# Supplementary material for: Causal relationship between gut microbiota and pathological scars: a two-sample Mendelian randomization study
Source: Front Med (Lausanne). 2024 Jul 2;11:1405097. doi: 10.3389/fmed.2024.1405097 (PMC11250559; doi:10.3389/fmed.2024.1405097)
Supplement: Supplementary file 1 [file Table_1.XLSX]

## Sheet: Inverse variance weighted
Table S1. MR analysis of gut microbiota on keloid
id.exposure	outcome	method	nsnp	b	se	p	FDR-adjusted p	OR	OR_lci95	OR_uci95
class.Actinobacteria.id.419	Keloid	Inverse variance weighted	15	-0.0405076	0.187467	0.828927	0.932228	1.27828	0.396916	4.11672
class.Alphaproteobacteria.id.2379	Keloid	Inverse variance weighted	7	0.0158013	0.242132	0.947968	0.516308	0.989275	0.603965	1.6204
class.Bacilli.id.1673	Keloid	Inverse variance weighted	18	-0.0228381	0.158784	0.885634	0.933612	0.960302	0.665016	1.3867
class.Bacteroidia.id.912	Keloid	Inverse variance weighted	14	0.139862	0.157132	0.373419	0.446078	0.897228	0.436888	1.84262
class.Betaproteobacteria.id.2867	Keloid	Inverse variance weighted	12	0.169102	0.302616	0.576297	0.938708	1.07885	0.58636	1.98498
class.Clostridia.id.1859	Keloid	Inverse variance weighted	12	0.0849062	0.243669	0.727503	0.937286	0.687646	0.0563784	8.38721
class.Coriobacteriia.id.809	Keloid	Inverse variance weighted	14	-0.208405	0.208233	0.316911	0.363648	0.938075	0.531083	1.65697
class.Deltaproteobacteria.id.3087	Keloid	Inverse variance weighted	13	-0.00170408	0.214121	0.99365	0.86042	1.01593	0.632056	1.63294
class.Erysipelotrichia.id.2147	Keloid	Inverse variance weighted	13	0.152629	0.221093	0.489982	0.94023	1.07937	0.445576	2.61467
class.Gammaproteobacteria.id.3303	Keloid	Inverse variance weighted	6	-0.541164	0.292535	0.0643258	0.936291	0.997864	0.415805	2.39471
class.Lentisphaeria.id.2250	Keloid	Inverse variance weighted	8	0.0326845	0.169914	0.847461	0.861045	0.872996	0.361715	2.10697
class.Melainabacteria.id.1589	Keloid	Inverse variance weighted	10	-0.338704	0.171696	0.0485297	0.905331	0.957993	0.617436	1.48639
class.Methanobacteria.id.119	Keloid	Inverse variance weighted	10	0.0116655	0.120589	0.922934	0.923502	0.977421	0.716014	1.33426
class.Mollicutes.id.3920	Keloid	Inverse variance weighted	12	0.0239988	0.192214	0.900639	0.840227	0.985307	0.501838	1.93455
class.Negativicutes.id.2164	Keloid	Inverse variance weighted	12	0.492047	0.218148	0.0240977	0.94282	0.968306	0.554938	1.68959
class.Verrucomicrobiae.id.4029	Keloid	Inverse variance weighted	11	-0.16747	0.187388	0.371478	0.890481	1.18033	0.606179	2.29831
family.Acidaminococcaceae.id.2166	Keloid	Inverse variance weighted	7	0.221426	0.227909	0.331272	1	1.00253	0.655208	1.53396
family.Actinomycetaceae.id.421	Keloid	Inverse variance weighted	5	0.0153102	0.253633	0.951866	1	1.15011	0.845254	1.56493
family.Alcaligenaceae.id.2875	Keloid	Inverse variance weighted	12	0.141083	0.258531	0.585265	1	1.06574	0.521203	2.1792
family.Bacteroidaceae.id.917	Keloid	Inverse variance weighted	9	-0.319173	0.310578	0.304103	1	1.03454	0.616341	1.73651
family.BacteroidalesS24.7group.id.11173	Keloid	Inverse variance weighted	8	0.104361	0.162806	0.521512	1	1.98628	0.213896	18.445
family.Bifidobacteriaceae.id.433	Keloid	Inverse variance weighted	12	0.00666415	0.192499	0.972383	1	1.05547	0.541211	2.05839
family.Christensenellaceae.id.1866	Keloid	Inverse variance weighted	11	0.0328228	0.147541	0.823951	1	1.18424	0.654408	2.14305
family.Clostridiaceae1.id.1869	Keloid	Inverse variance weighted	10	-0.320049	0.212483	0.132008	1	1.24057	0.355623	4.32766
family.ClostridialesvadinBB60group.id.11286	Keloid	Inverse variance weighted	15	-0.00285357	0.13477	0.983107	1	1.22312	0.395443	3.78313
family.Coriobacteriaceae.id.811	Keloid	Inverse variance weighted	14	-0.208405	0.208233	0.316911	1	2.60267	0.236937	28.5894
family.Defluviitaleaceae.id.1924	Keloid	Inverse variance weighted	11	0.00161053	0.162466	0.992091	1	1.19281	0.656736	2.16646
family.Desulfovibrionaceae.id.3169	Keloid	Inverse variance weighted	10	-0.120403	0.226492	0.595001	1	1.08861	0.675241	1.75505
family.Enterobacteriaceae.id.3469	Keloid	Inverse variance weighted	7	0.181759	0.24669	0.46125	1	1.17418	0.433152	3.18295
family.Erysipelotrichaceae.id.2149	Keloid	Inverse variance weighted	13	0.152629	0.221093	0.489982	1	1.05093	0.409237	2.69881
family.FamilyXI.id.1936	Keloid	Inverse variance weighted	8	-0.00862725	0.109004	0.936917	1	2.01456	0.402546	10.082
family.FamilyXIII.id.1957	Keloid	Inverse variance weighted	10	-0.565147	0.254598	0.0264347	1	0.989308	0.566222	1.72853
family.Lachnospiraceae.id.1987	Keloid	Inverse variance weighted	17	0.166843	0.18517	0.367574	1	0.811878	0.539807	1.22108
family.Lactobacillaceae.id.1836	Keloid	Inverse variance weighted	9	0.198136	0.163987	0.226954	1	0.961708	0.383861	2.40942
family.Methanobacteriaceae.id.121	Keloid	Inverse variance weighted	10	0.0116655	0.120589	0.922934	1	1.06032	0.409063	2.7484
family.Oxalobacteraceae.id.2966	Keloid	Inverse variance weighted	14	0.108897	0.12076	0.367181	1	1.11178	0.335217	3.68732
family.Pasteurellaceae.id.3689	Keloid	Inverse variance weighted	14	0.111451	0.161176	0.489261	1	1.33578	0.80519	2.21601
family.Peptococcaceae.id.2024	Keloid	Inverse variance weighted	9	-0.194669	0.191534	0.309455	1	0.998297	0.65614	1.51888
family.Peptostreptococcaceae.id.2042	Keloid	Inverse variance weighted	14	0.104796	0.186244	0.573652	1	1.30018	0.508669	3.3233
family.Porphyromonadaceae.id.943	Keloid	Inverse variance weighted	9	0.179385	0.375419	0.632774	1	1.39662	0.674815	2.8905
family.Prevotellaceae.id.960	Keloid	Inverse variance weighted	16	-0.0299682	0.182565	0.869612	1	2.12487	0.257241	17.5518
family.Rhodospirillaceae.id.2717	Keloid	Inverse variance weighted	15	-0.339101	0.178637	0.0576604	1	1.11079	0.615531	2.00454
family.Rikenellaceae.id.967	Keloid	Inverse variance weighted	19	-0.0985284	0.188282	0.600764	1	1.16489	0.755244	1.79674
family.Ruminococcaceae.id.2050	Keloid	Inverse variance weighted	10	0.0626514	0.222844	0.7786	1	0.865661	0.319378	2.34634
family.Streptococcaceae.id.1850	Keloid	Inverse variance weighted	14	0.260498	0.209438	0.213574	1	0.920965	0.349315	2.42811
family.Veillonellaceae.id.2172	Keloid	Inverse variance weighted	19	-0.127951	0.167302	0.444397	1	0.29033	0.0280667	3.00326
family.Verrucomicrobiaceae.id.4036	Keloid	Inverse variance weighted	11	-0.167752	0.187452	0.370838	1	0.54577	0.260345	1.14412
family.Victivallaceae.id.2255	Keloid	Inverse variance weighted	12	0.0857211	0.097992	0.381695	1	0.58207	0.328069	1.03273
genus.Clostridiuminnocuumgroup.id.14397	Keloid	Inverse variance weighted	9	-0.181893	0.142554	0.20197	1	0.566441	0.193674	1.65668
genus.Eubacteriumbrachygroup.id.11296	Keloid	Inverse variance weighted	10	-0.0427071	0.129987	0.742496	1	0.550922	0.174895	1.73541
genus.Eubacteriumcoprostanoligenesgroup.id.11375	Keloid	Inverse variance weighted	13	-0.0816792	0.228524	0.720777	1	0.449893	0.153835	1.31572
genus.Eubacteriumeligensgroup.id.14372	Keloid	Inverse variance weighted	7	-0.0999505	0.275958	0.717207	1	0.952076	0.655201	1.38347
genus.Eubacteriumfissicatenagroup.id.14373	Keloid	Inverse variance weighted	9	0.143731	0.114778	0.210476	1	1.03322	0.740561	1.44155
genus.Eubacteriumhalliigroup.id.11338	Keloid	Inverse variance weighted	16	0.0115936	0.171493	0.946101	1	0.952311	0.535516	1.6935
genus.Eubacteriumnodatumgroup.id.11297	Keloid	Inverse variance weighted	11	-0.00995811	0.102289	0.922446	1	0.863066	0.550438	1.35325
genus.Eubacteriumoxidoreducensgroup.id.11339	Keloid	Inverse variance weighted	5	0.0444112	0.164077	0.786643	1	1.28533	0.433316	3.8126
genus.Eubacteriumrectalegroup.id.14374	Keloid	Inverse variance weighted	8	-0.126029	0.282732	0.655775	1	0.680726	0.450805	1.02791
genus.Eubacteriumruminantiumgroup.id.11340	Keloid	Inverse variance weighted	18	0.0157788	0.112575	0.888532	1	0.712693	0.509041	0.997822
genus.Eubacteriumventriosumgroup.id.11341	Keloid	Inverse variance weighted	15	0.0432965	0.212277	0.838384	1	0.516259	0.270849	0.98403
genus.Eubacteriumxylanophilumgroup.id.14375	Keloid	Inverse variance weighted	9	-0.313358	0.227796	0.168943	1	0.628121	0.346163	1.13974
genus.Ruminococcusgauvreauiigroup.id.11342	Keloid	Inverse variance weighted	12	-0.0180242	0.185537	0.92261	1	0.946798	0.374064	2.39645
genus.Ruminococcusgnavusgroup.id.14376	Keloid	Inverse variance weighted	12	0.108038	0.126791	0.394159	1	1.0315	0.756429	1.40661
genus.Ruminococcustorquesgroup.id.14377	Keloid	Inverse variance weighted	9	0.0708641	0.191029	0.710667	1	1.01173	0.798765	1.28148
genus.Actinomyces.id.423	Keloid	Inverse variance weighted	7	-0.0726024	0.168672	0.666879	1	1.02524	0.639552	1.64351
genus.Adlercreutzia.id.812	Keloid	Inverse variance weighted	8	0.262588	0.191155	0.169538	1	1.04703	0.68325	1.60451
genus.Akkermansia.id.4037	Keloid	Inverse variance weighted	11	-0.167911	0.187448	0.370373	1	1.33946	0.278736	6.43676
genus.Alistipes.id.968	Keloid	Inverse variance weighted	14	0.103256	0.22238	0.642415	1	0.923943	0.571878	1.49275
genus.Allisonella.id.2174	Keloid	Inverse variance weighted	8	0.00275348	0.14994	0.985349	1	1.02429	0.702759	1.49293
genus.Alloprevotella.id.961	Keloid	Inverse variance weighted	6	0.127493	0.143614	0.374674	1	0.887091	0.354727	2.21841
genus.Anaerofilum.id.2053	Keloid	Inverse variance weighted	11	-0.00521142	0.124624	0.966645	1	0.680377	0.313733	1.4755
genus.Anaerostipes.id.1991	Keloid	Inverse variance weighted	13	-0.248816	0.22011	0.258301	1	0.62365	0.10732	3.62409
genus.Anaerotruncus.id.2054	Keloid	Inverse variance weighted	13	-0.212185	0.182096	0.243923	1	1.7775	1.01715	3.10624
genus.Bacteroides.id.918	Keloid	Inverse variance weighted	9	-0.319173	0.310578	0.304103	1	1.63566	1.0666	2.50833
genus.Barnesiella.id.944	Keloid	Inverse variance weighted	14	0.00660406	0.202335	0.973962	1	1.89615	0.817419	4.39846
genus.Bifidobacterium.id.436	Keloid	Inverse variance weighted	12	0.185421	0.167988	0.26969	1	1.83441	0.781458	4.30615
genus.Bilophila.id.3170	Keloid	Inverse variance weighted	13	0.0746264	0.170115	0.660891	1	0.40187	0.0763194	2.1161
genus.Blautia.id.1992	Keloid	Inverse variance weighted	13	0.241756	0.211043	0.25199	1	0.934497	0.573363	1.52309
genus.Butyricicoccus.id.2055	Keloid	Inverse variance weighted	8	0.29292	0.205327	0.153696	1	0.845802	0.585815	1.22117
genus.Butyricimonas.id.945	Keloid	Inverse variance weighted	13	0.00983376	0.187852	0.958251	1	0.977037	0.460781	2.0717
genus.Butyrivibrio.id.1993	Keloid	Inverse variance weighted	15	0.00602681	0.0830638	0.942159	1	0.990673	0.485016	2.0235
genus.CandidatusSoleaferrea.id.11350	Keloid	Inverse variance weighted	10	-0.155758	0.145662	0.284931	1	0.978848	0.292526	3.27541
genus.Catenibacterium.id.2153	Keloid	Inverse variance weighted	5	-0.0936679	0.216411	0.665142	1	0.966185	0.53648	1.74007
genus.ChristensenellaceaeR.7group.id.11283	Keloid	Inverse variance weighted	10	-0.0402263	0.287266	0.888635	1	1.24786	0.798296	1.95058
genus.Clostridiumsensustricto1.id.1873	Keloid	Inverse variance weighted	7	-0.106875	0.27374	0.696222	1	0.943387	0.415916	2.13981
genus.Collinsella.id.815	Keloid	Inverse variance weighted	9	0.151709	0.271291	0.576019	1	0.939617	0.482453	1.82998
genus.Coprobacter.id.949	Keloid	Inverse variance weighted	11	-0.160194	0.167544	0.339004	1	0.38368	0.108811	1.3529
genus.Coprococcus1.id.11301	Keloid	Inverse variance weighted	11	-0.199431	0.304869	0.513014	1	1.24971	0.690636	2.26136
genus.Coprococcus2.id.11302	Keloid	Inverse variance weighted	8	-0.478374	0.223114	0.0320267	1	1.01543	0.617664	1.66934
genus.Coprococcus3.id.11303	Keloid	Inverse variance weighted	9	-0.173209	0.247241	0.483572	1	1.35913	0.624413	2.95834
genus.DefluviitaleaceaeUCG011.id.11287	Keloid	Inverse variance weighted	9	0.0271188	0.174169	0.876266	1	1.3826	0.619254	3.08689
genus.Desulfovibrio.id.3173	Keloid	Inverse variance weighted	10	0.159712	0.167209	0.339494	1	1.34508	0.0939705	19.2532
genus.Dialister.id.2183	Keloid	Inverse variance weighted	11	-0.234884	0.208366	0.25963	1	1.15463	0.603218	2.2101
genus.Dorea.id.1997	Keloid	Inverse variance weighted	10	-0.00237246	0.239458	0.992095	1	1.15152	0.693754	1.91134
genus.Eggerthella.id.819	Keloid	Inverse variance weighted	11	-0.0159558	0.148425	0.914392	1	1.10158	0.383403	3.165
genus.Eisenbergiella.id.11304	Keloid	Inverse variance weighted	11	0.0217891	0.116476	0.851607	1	1.07758	0.413521	2.80801
genus.Enterorhabdus.id.820	Keloid	Inverse variance weighted	6	-0.286524	0.160638	0.0744786	1	0.0832457	0.00366966	1.88842
genus.Erysipelatoclostridium.id.11381	Keloid	Inverse variance weighted	15	-0.0588313	0.141712	0.678034	1	0.972778	0.467703	2.02329
genus.ErysipelotrichaceaeUCG003.id.11384	Keloid	Inverse variance weighted	16	-0.181543	0.158692	0.252624	1	0.72675	0.395381	1.33584
genus.Escherichia.Shigella.id.3504	Keloid	Inverse variance weighted	10	0.0467997	0.255598	0.85472	1	1.29583	0.376382	4.46135
genus.Faecalibacterium.id.2057	Keloid	Inverse variance weighted	10	-0.210046	0.207184	0.310671	1	1.29583	0.37331	4.49806
genus.FamilyXIIIAD3011group.id.11293	Keloid	Inverse variance weighted	13	0.266491	0.1694	0.115686	1	1.00944	0.334791	3.04362
genus.FamilyXIIIUCG001.id.11294	Keloid	Inverse variance weighted	8	-0.0712179	0.207048	0.730871	1	0.951234	0.630306	1.43557
genus.Flavonifractor.id.2059	Keloid	Inverse variance weighted	5	-0.295756	0.364293	0.41687	1	1.11	0.806753	1.52724
genus.Fusicatenibacter.id.11305	Keloid	Inverse variance weighted	18	0.237335	0.178007	0.182435	1	0.957327	0.526505	1.74068
genus.Gordonibacter.id.821	Keloid	Inverse variance weighted	12	-0.146226	0.102125	0.152193	1	0.93975	0.582419	1.51631
genus.Haemophilus.id.3698	Keloid	Inverse variance weighted	9	0.07613	0.166277	0.64706	1	1.61684	0.464026	5.6337
genus.Holdemanella.id.11393	Keloid	Inverse variance weighted	11	-0.199746	0.152267	0.189582	1	1.25871	0.763601	2.07485
genus.Holdemania.id.2157	Keloid	Inverse variance weighted	15	0.0711574	0.19071	0.70906	1	1.00669	0.690296	1.46809
genus.Howardella.id.2000	Keloid	Inverse variance weighted	10	0.087237	0.118639	0.462146	1	1.38209	0.652584	2.92709
genus.Hungatella.id.11306	Keloid	Inverse variance weighted	5	0.0400013	0.18305	0.827019	1	1.33374	0.731298	2.43249
genus.Intestinibacter.id.11345	Keloid	Inverse variance weighted	15	-0.106282	0.157175	0.498914	1	1.46957	0.837592	2.57837
genus.Intestinimonas.id.2062	Keloid	Inverse variance weighted	17	-0.161649	0.132367	0.222002	1	1.2215	0.842315	1.77138
genus.Lachnoclostridium.id.11308	Keloid	Inverse variance weighted	13	-0.197812	0.260694	0.447979	1	1.03337	0.773866	1.37989
genus.Lachnospira.id.2004	Keloid	Inverse variance weighted	6	0.148104	0.308013	0.630632	1	1.14473	0.625178	2.09607
genus.LachnospiraceaeFCS020group.id.11314	Keloid	Inverse variance weighted	12	-0.163698	0.154561	0.289546	1	1.18771	0.806737	1.74859
genus.LachnospiraceaeNC2004group.id.11316	Keloid	Inverse variance weighted	9	0.0695821	0.146313	0.634381	1	0.176819	0.0445779	0.701353
genus.LachnospiraceaeND3007group.id.11317	Keloid	Inverse variance weighted	3	-0.0224553	0.406081	0.955901	1	0.758674	0.429603	1.33981
genus.LachnospiraceaeNK4A136group.id.11319	Keloid	Inverse variance weighted	15	-0.199046	0.160476	0.214846	1	0.726113	0.478779	1.10122
genus.LachnospiraceaeUCG001.id.11321	Keloid	Inverse variance weighted	13	-0.0479257	0.158012	0.761658	1	0.898982	0.337208	2.39665
genus.LachnospiraceaeUCG004.id.11324	Keloid	Inverse variance weighted	12	-0.373172	0.205112	0.0688567	1	0.822072	0.339599	1.99
genus.LachnospiraceaeUCG008.id.11328	Keloid	Inverse variance weighted	11	0.0922267	0.165653	0.5777	1	1.43311	0.643773	3.19028
genus.LachnospiraceaeUCG010.id.11330	Keloid	Inverse variance weighted	10	-0.240772	0.194898	0.21669	1	0.983892	0.676261	1.43146
genus.Lactobacillus.id.1837	Keloid	Inverse variance weighted	10	0.192704	0.144839	0.183364	1	0.99715	0.765671	1.29861
genus.Lactococcus.id.1851	Keloid	Inverse variance weighted	9	0.0969286	0.148538	0.514044	1	0.758729	0.374357	1.53776
genus.Marvinbryantia.id.2005	Keloid	Inverse variance weighted	10	0.249219	0.221514	0.260559	1	1.22724	0.713483	2.11093
genus.Methanobrevibacter.id.123	Keloid	Inverse variance weighted	6	-0.114729	0.138115	0.406158	1	2.01456	0.402546	10.082
genus.Odoribacter.id.952	Keloid	Inverse variance weighted	7	0.0631476	0.417396	0.879747	1	0.989308	0.567402	1.72493
genus.Olsenella.id.822	Keloid	Inverse variance weighted	11	-0.102336	0.129081	0.427891	1	0.811878	0.539807	1.22108
genus.Oscillibacter.id.2063	Keloid	Inverse variance weighted	14	-0.178319	0.148515	0.229874	1	0.961708	0.368483	2.50998
genus.Oscillospira.id.2064	Keloid	Inverse variance weighted	8	-0.280033	0.293222	0.339568	1	1.06032	0.419932	2.67726
genus.Oxalobacter.id.2978	Keloid	Inverse variance weighted	11	0.140163	0.131006	0.284667	1	0.455808	0.141946	1.46366
genus.Parabacteroides.id.954	Keloid	Inverse variance weighted	6	0.213719	0.336685	0.525576	1	1.02271	0.674069	1.55169
genus.Paraprevotella.id.962	Keloid	Inverse variance weighted	13	0.123964	0.125946	0.324987	1	1.00161	0.72846	1.37719
genus.Parasutterella.id.2892	Keloid	Inverse variance weighted	15	-0.172324	0.145099	0.234979	1	1.04474	0.571967	1.90828
genus.Peptococcus.id.2037	Keloid	Inverse variance weighted	12	0.17178	0.127041	0.176324	1	1.03929	0.564254	1.91426
genus.Phascolarctobacterium.id.2168	Keloid	Inverse variance weighted	9	-0.00660928	0.211029	0.975015	0.633596	1.1961	0.369496	3.87189
genus.Prevotella7.id.11182	Keloid	Inverse variance weighted	11	0.00901193	0.148862	0.951727	0.46835	1.28654	0.741738	2.23148
genus.Prevotella9.id.11183	Keloid	Inverse variance weighted	15	-0.0923857	0.1526	0.544906	0.466997	0.886563	0.568743	1.38198
genus.RikenellaceaeRC9gutgroup.id.11191	Keloid	Inverse variance weighted	11	0.075953	0.122484	0.535188	0.638479	1.3526	0.496943	3.68157
genus.Romboutsia.id.11347	Keloid	Inverse variance weighted	13	-0.106603	0.172986	0.537731	0.430948	1.42433	0.690097	2.93974
genus.Roseburia.id.2012	Keloid	Inverse variance weighted	13	-0.126859	0.203581	0.533194	0.466451	1.04042	0.0483785	22.375
genus.Ruminiclostridium5.id.11355	Keloid	Inverse variance weighted	11	0.235923	0.193948	0.223825	0.464129	1.16125	0.644105	2.09361
genus.Ruminiclostridium6.id.11356	Keloid	Inverse variance weighted	15	0.12096	0.197238	0.5397	0.46963	1.19932	0.73952	1.94502
genus.Ruminiclostridium9.id.11357	Keloid	Inverse variance weighted	9	0.228073	0.238784	0.339505	0.4701	1.1885	0.503933	2.803
genus.RuminococcaceaeNK4A214group.id.11358	Keloid	Inverse variance weighted	13	-0.194426	0.181818	0.284915	0.47088	1.13672	0.506271	2.55224
genus.RuminococcaceaeUCG002.id.11360	Keloid	Inverse variance weighted	22	-0.0883043	0.138813	0.524687	0.456794	2.12487	0.257241	17.5518
genus.RuminococcaceaeUCG003.id.11361	Keloid	Inverse variance weighted	12	0.0614588	0.210103	0.769891	0.593522	1.11079	0.633614	1.94734
genus.RuminococcaceaeUCG004.id.11362	Keloid	Inverse variance weighted	11	0.164244	0.165121	0.319887	0.626347	1.16489	0.755244	1.79674
genus.RuminococcaceaeUCG005.id.11363	Keloid	Inverse variance weighted	14	0.191476	0.168417	0.255574	0.470544	0.865661	0.319204	2.34762
genus.RuminococcaceaeUCG009.id.11366	Keloid	Inverse variance weighted	12	-0.133804	0.141584	0.344632	0.59452	0.920965	0.349675	2.42561
genus.RuminococcaceaeUCG010.id.11367	Keloid	Inverse variance weighted	6	0.0642595	0.258908	0.803984	0.470862	2.01662	0.486842	8.35336
genus.RuminococcaceaeUCG011.id.11368	Keloid	Inverse variance weighted	8	0.0225756	0.121086	0.852097	0.432402	1.08725	0.823435	1.43558
genus.RuminococcaceaeUCG013.id.11370	Keloid	Inverse variance weighted	12	0.155269	0.27869	0.577433	0.310821	0.99141	0.800694	1.22755
genus.RuminococcaceaeUCG014.id.11371	Keloid	Inverse variance weighted	11	-0.0521892	0.21269	0.806165	0.466913	1.20115	0.793399	1.81847
genus.Ruminococcus1.id.11373	Keloid	Inverse variance weighted	10	-0.280261	0.22642	0.215792	0.606176	1.14588	0.756037	1.73673
genus.Ruminococcus2.id.11374	Keloid	Inverse variance weighted	15	-0.0712163	0.165003	0.666027	1	2.40027	0.259934	22.1645
genus.Sellimonas.id.14369	Keloid	Inverse variance weighted	9	-0.00195157	0.118199	0.986827	1	0.793682	0.38494	1.63644
genus.Senegalimassilia.id.11160	Keloid	Inverse variance weighted	5	-0.0674227	0.203473	0.740373	1	0.568276	0.345018	0.936004
genus.Slackia.id.825	Keloid	Inverse variance weighted	6	-0.0708527	0.160449	0.658785	1	1.04127	0.30784	3.52213
genus.Streptococcus.id.1853	Keloid	Inverse variance weighted	15	0.0656037	0.200835	0.74393	1	1.06317	0.328296	3.44304
genus.Subdoligranulum.id.2070	Keloid	Inverse variance weighted	11	0.16405	0.208204	0.430738	1	1.0114	0.356787	2.86705
genus.Sutterella.id.2896	Keloid	Inverse variance weighted	12	0.0792704	0.228804	0.729001	1	1.19567	0.713632	2.0033
genus.Terrisporobacter.id.11348	Keloid	Inverse variance weighted	5	0.0482926	0.188736	0.798048	1	1.18157	0.821938	1.69855
genus.Turicibacter.id.2162	Keloid	Inverse variance weighted	10	0.314101	0.202411	0.12071	1	1.21147	0.492049	2.98273
genus.Tyzzerella3.id.11335	Keloid	Inverse variance weighted	13	0.167447	0.10672	0.11664	1	1.18179	0.55682	2.50824
genus.Veillonella.id.2198	Keloid	Inverse variance weighted	8	-0.243105	0.22378	0.277322	1	2.05417	0.931631	4.52929
genus.Victivallis.id.2256	Keloid	Inverse variance weighted	10	0.0791321	0.0999835	0.42868	1	1.35791	0.914107	2.01719
order.Actinomycetales.id.420	Keloid	Inverse variance weighted	5	0.0152605	0.253967	0.952085	1	1.21913	0.884017	1.68127
order.Bacillales.id.1674	Keloid	Inverse variance weighted	9	0.11633	0.140405	0.407367	1	1.49563	0.942643	2.37301
order.Bacteroidales.id.913	Keloid	Inverse variance weighted	14	0.139862	0.157132	0.373419	1	1.39121	0.904937	2.13878
order.Bifidobacteriales.id.432	Keloid	Inverse variance weighted	12	0.00666415	0.192499	0.972383	1	0.946798	0.374064	2.39645
order.Burkholderiales.id.2874	Keloid	Inverse variance weighted	11	0.39886	0.249148	0.109401	1	1.0315	0.743861	1.43037
order.Clostridiales.id.1863	Keloid	Inverse variance weighted	13	0.186761	0.204546	0.361215	1	1.01173	0.798765	1.28148
order.Coriobacteriales.id.810	Keloid	Inverse variance weighted	14	-0.208405	0.208233	0.316911	1	1.02524	0.624702	1.68258
order.Desulfovibrionales.id.3156	Keloid	Inverse variance weighted	12	-0.148709	0.194904	0.44547	1	1.04703	0.686756	1.59632
order.Enterobacteriales.id.3468	Keloid	Inverse variance weighted	7	0.181759	0.24669	0.46125	1	1.16063	0.42262	3.1874
order.Erysipelotrichales.id.2148	Keloid	Inverse variance weighted	13	0.152629	0.221093	0.489982	1	1.13607	0.797851	1.61767
order.Gastranaerophilales.id.1591	Keloid	Inverse variance weighted	9	-0.201013	0.166414	0.227083	1	1.11505	0.880036	1.41282
order.Lactobacillales.id.1800	Keloid	Inverse variance weighted	15	-0.0449589	0.181101	0.803938	1	1.39883	0.721359	2.71254
order.Methanobacteriales.id.120	Keloid	Inverse variance weighted	10	0.0116655	0.120589	0.922934	1	0.919535	0.477227	1.77179
order.MollicutesRF9.id.11579	Keloid	Inverse variance weighted	13	0.124792	0.175558	0.47719	1	1.40553	0.682928	2.8927
order.NB1n.id.3953	Keloid	Inverse variance weighted	13	-0.0306882	0.1258	0.807275	1	1.08452	0.736536	1.59691
order.Pasteurellales.id.3688	Keloid	Inverse variance weighted	14	0.111451	0.161176	0.489261	1	1.1179	0.815092	1.5332
order.Rhodospirillales.id.2667	Keloid	Inverse variance weighted	14	-0.263419	0.166154	0.112877	1	1.13859	0.652679	1.98626
order.Selenomonadales.id.2165	Keloid	Inverse variance weighted	12	0.492047	0.218148	0.0240977	1	1.1071	0.713447	1.71795
order.Verrucomicrobiales.id.4030	Keloid	Inverse variance weighted	11	-0.16747	0.187388	0.371478	1	0.459209	0.129253	1.63148
order.Victivallales.id.2254	Keloid	Inverse variance weighted	8	0.0326845	0.169914	0.847461	1	0.897099	0.548577	1.46704
phylum.Actinobacteria.id.400	Keloid	Inverse variance weighted	15	-0.0298613	0.217448	0.890773	1	0.823107	0.565483	1.1981
phylum.Bacteroidetes.id.905	Keloid	Inverse variance weighted	12	0.188653	0.171469	0.271238	1	0.572179	0.267305	1.22477
phylum.Cyanobacteria.id.1500	Keloid	Inverse variance weighted	8	0.0609003	0.18299	0.73928	1	1.02563	0.490285	2.14553
phylum.Euryarchaeota.id.55	Keloid	Inverse variance weighted	12	0.013589	0.0994757	0.891342	1	1.06655	0.394095	2.88644
phylum.Firmicutes.id.1672	Keloid	Inverse variance weighted	16	0.155403	0.18298	0.395719	1	1.22306	0.745377	2.00689
phylum.Lentisphaerae.id.2238	Keloid	Inverse variance weighted	9	0.113496	0.150822	0.451738	1	1.11048	0.770865	1.59973
phylum.Proteobacteria.id.2375	Keloid	Inverse variance weighted	12	-0.00214146	0.223933	0.99237	1	1.15749	0.509084	2.63176
phylum.Tenericutes.id.3919	Keloid	Inverse variance weighted	12	0.0239988	0.192214	0.900639	1	1.19314	0.592692	2.40191
phylum.Verrucomicrobia.id.3982	Keloid	Inverse variance weighted	12	0.0506826	0.15131	0.737657	1	1.57337	0.0227682	108.726

## Sheet: MR Egger
id.exposure	outcome	method	nsnp	b	se	p	OR	OR_lci95	OR_uci95
class.Actinobacteria.id.419	Keloid || id:ebi-a-GCST90018874	MR Egger	15	0.245513	0.596706	0.687448	1.12422	0.537207	2.35266
class.Alphaproteobacteria.id.2379	Keloid || id:ebi-a-GCST90018874	MR Egger	7	-0.374481	1.27612	0.780966	1.19648	0.573248	2.49729
class.Bacilli.id.1673	Keloid || id:ebi-a-GCST90018874	MR Egger	18	-0.135825	0.449528	0.766431	1.33659	0.390745	4.57198
class.Bacteroidia.id.912	Keloid || id:ebi-a-GCST90018874	MR Egger	14	0.165797	0.339988	0.634582	1.15761	0.370269	3.61917
class.Betaproteobacteria.id.2867	Keloid || id:ebi-a-GCST90018874	MR Egger	12	0.686262	1.137	0.559571	0.308141	0.1409	0.673888
class.Clostridia.id.1859	Keloid || id:ebi-a-GCST90018874	MR Egger	12	0.956538	1.2227	0.452157	1.02878	0.647781	1.63387
class.Coriobacteriia.id.809	Keloid || id:ebi-a-GCST90018874	MR Egger	14	0.700403	0.821607	0.41064	0.970476	0.678551	1.38799
class.Deltaproteobacteria.id.3087	Keloid || id:ebi-a-GCST90018874	MR Egger	13	0.105961	0.611704	0.865622	1.65998	0.648059	4.25197
class.Erysipelotrichia.id.2147	Keloid || id:ebi-a-GCST90018874	MR Egger	13	0.753709	1.07727	0.498676	0.496524	0.242058	1.0185
class.Gammaproteobacteria.id.3303	Keloid || id:ebi-a-GCST90018874	MR Egger	6	-1.23674	1.19206	0.358109	2.07772	0.314262	13.7367
class.Lentisphaeria.id.2250	Keloid || id:ebi-a-GCST90018874	MR Egger	8	-0.798746	0.547516	0.194887	0.638771	0.431653	0.945269
class.Melainabacteria.id.1589	Keloid || id:ebi-a-GCST90018874	MR Egger	10	0.251012	0.554745	0.66294	0.71241	0.501963	1.01109
class.Methanobacteria.id.119	Keloid || id:ebi-a-GCST90018874	MR Egger	10	-0.0546695	0.473806	0.910985	0.641674	0.310242	1.32718
class.Mollicutes.id.3920	Keloid || id:ebi-a-GCST90018874	MR Egger	12	0.292267	0.800897	0.722767	0.63035	0.349547	1.13673
class.Negativicutes.id.2164	Keloid || id:ebi-a-GCST90018874	MR Egger	12	-0.472167	0.897842	0.610427	0.766768	0.198764	2.95794
class.Verrucomicrobiae.id.4029	Keloid || id:ebi-a-GCST90018874	MR Egger	11	-0.911628	0.847552	0.310093	1.25635	0.79161	1.99394
family.Acidaminococcaceae.id.2166	Keloid || id:ebi-a-GCST90018874	MR Egger	7	-0.0213786	0.616236	0.973667	0.90617	0.626528	1.31063
family.Actinomycetaceae.id.421	Keloid || id:ebi-a-GCST90018874	MR Egger	5	-0.957947	0.642959	0.233021	1.30412	0.668707	2.54329
family.Alcaligenaceae.id.2875	Keloid || id:ebi-a-GCST90018874	MR Egger	12	0.296453	1.35777	0.831557	1.28897	0.745747	2.22789
family.Bacteroidaceae.id.917	Keloid || id:ebi-a-GCST90018874	MR Egger	9	-2.48596	1.5927	0.162529	1.15462	0.462009	2.88554
family.BacteroidalesS24.7group.id.11173	Keloid || id:ebi-a-GCST90018874	MR Egger	8	0.00939947	0.563087	0.987223	1.04184	0.623097	1.74199
family.Bifidobacteriaceae.id.433	Keloid || id:ebi-a-GCST90018874	MR Egger	12	0.480476	0.636883	0.467992	1.06466	0.687892	1.64778
family.Christensenellaceae.id.1866	Keloid || id:ebi-a-GCST90018874	MR Egger	11	0.384967	0.286832	0.212426	0.681594	0.310425	1.49656
family.Clostridiaceae1.id.1869	Keloid || id:ebi-a-GCST90018874	MR Egger	10	-1.73263	0.703003	0.0390371	0.950124	0.548257	1.64656
family.ClostridialesvadinBB60group.id.11286	Keloid || id:ebi-a-GCST90018874	MR Egger	15	0.35985	0.408296	0.394133	2.49964	0.375327	16.6473
family.Coriobacteriaceae.id.811	Keloid || id:ebi-a-GCST90018874	MR Egger	14	0.700403	0.821607	0.41064	1.56054	0.961599	2.53253
family.Defluviitaleaceae.id.1924	Keloid || id:ebi-a-GCST90018874	MR Egger	11	-0.785684	0.595216	0.219421	1.29758	0.860708	1.95619
family.Desulfovibrionaceae.id.3169	Keloid || id:ebi-a-GCST90018874	MR Egger	10	0.179063	0.599326	0.772726	1.66942	0.745178	3.73998
family.Enterobacteriaceae.id.3469	Keloid || id:ebi-a-GCST90018874	MR Egger	7	0.0396229	1.56547	0.980786	1.69788	0.9723	2.96494
family.Erysipelotrichaceae.id.2149	Keloid || id:ebi-a-GCST90018874	MR Egger	13	0.753709	1.07727	0.498676	0.938957	0.475457	1.8543
family.FamilyXI.id.1936	Keloid || id:ebi-a-GCST90018874	MR Egger	8	0.701424	0.725122	0.370742	0.922149	0.59794	1.42215
family.FamilyXIII.id.1957	Keloid || id:ebi-a-GCST90018874	MR Egger	10	0.875583	1.13414	0.462294	0.879896	0.6339	1.22136
family.Lachnospiraceae.id.1987	Keloid || id:ebi-a-GCST90018874	MR Egger	17	0.0113342	0.531608	0.983271	1.07425	0.536939	2.14926
family.Lactobacillaceae.id.1836	Keloid || id:ebi-a-GCST90018874	MR Egger	9	0.719873	0.403414	0.117528	0.946561	0.613399	1.46068
family.Methanobacteriaceae.id.121	Keloid || id:ebi-a-GCST90018874	MR Egger	10	-0.0546695	0.473806	0.910985	0.400026	0.075949	2.10696
family.Oxalobacteraceae.id.2966	Keloid || id:ebi-a-GCST90018874	MR Egger	14	0.148961	0.515431	0.777511	0.934315	0.579534	1.50629
family.Pasteurellaceae.id.3689	Keloid || id:ebi-a-GCST90018874	MR Egger	14	0.340413	0.368255	0.373496	0.845564	0.585577	1.22098
family.Peptococcaceae.id.2024	Keloid || id:ebi-a-GCST90018874	MR Egger	9	-0.778249	0.646804	0.268	0.977083	0.435041	2.19448
family.Peptostreptococcaceae.id.2042	Keloid || id:ebi-a-GCST90018874	MR Egger	14	0.0644308	0.507956	0.901165	0.990723	0.466572	2.10371
family.Porphyromonadaceae.id.943	Keloid || id:ebi-a-GCST90018874	MR Egger	9	0.453219	2.16102	0.839856	1.07164	0.433013	2.65213
family.Prevotellaceae.id.960	Keloid || id:ebi-a-GCST90018874	MR Egger	16	-1.1772	0.399237	0.0105748	1.07848	0.831334	1.39911
family.Rhodospirillaceae.id.2717	Keloid || id:ebi-a-GCST90018874	MR Egger	15	0.731271	0.963673	0.461488	1.0895	0.899116	1.3202
family.Rikenellaceae.id.967	Keloid || id:ebi-a-GCST90018874	MR Egger	19	-0.265571	0.688809	0.704611	1.15827	0.761848	1.76097
family.Ruminococcaceae.id.2050	Keloid || id:ebi-a-GCST90018874	MR Egger	10	0.143771	0.467317	0.766205	1.04871	0.739871	1.48646
family.Streptococcaceae.id.1850	Keloid || id:ebi-a-GCST90018874	MR Egger	14	0.916145	0.9674	0.36231	1.08591	0.265223	4.44607
family.Veillonellaceae.id.2172	Keloid || id:ebi-a-GCST90018874	MR Egger	19	-0.0629851	0.347191	0.858188	0.782524	0.550703	1.11193
family.Verrucomicrobiaceae.id.4036	Keloid || id:ebi-a-GCST90018874	MR Egger	11	-0.916225	0.847688	0.307874	0.833691	0.630465	1.10243
family.Victivallaceae.id.2255	Keloid || id:ebi-a-GCST90018874	MR Egger	12	0.0691873	0.462335	0.884018	1.14916	0.6355	2.07799
genus.Clostridiuminnocuumgroup.id.14397	Keloid || id:ebi-a-GCST90018874	MR Egger	9	0.0824189	0.719185	0.91198	0.639188	0.348321	1.17295
genus.Eubacteriumbrachygroup.id.11296	Keloid || id:ebi-a-GCST90018874	MR Egger	10	-0.467322	0.61473	0.46894	0.626678	0.187835	2.09081
genus.Eubacteriumcoprostanoligenesgroup.id.11375	Keloid || id:ebi-a-GCST90018874	MR Egger	13	-1.68627	0.879747	0.0815996	0.976698	0.712441	1.33897
genus.Eubacteriumeligensgroup.id.14372	Keloid || id:ebi-a-GCST90018874	MR Egger	7	-0.83149	1.34545	0.563634	0.958192	0.742686	1.23623
genus.Eubacteriumfissicatenagroup.id.14373	Keloid || id:ebi-a-GCST90018874	MR Egger	9	0.00679965	0.562218	0.990688	1.07188	0.65758	1.7472
genus.Eubacteriumhalliigroup.id.11338	Keloid || id:ebi-a-GCST90018874	MR Egger	16	-0.114262	0.347235	0.746979	1.01551	0.634798	1.62455
genus.Eubacteriumnodatumgroup.id.11297	Keloid || id:ebi-a-GCST90018874	MR Egger	11	0.547208	0.472222	0.276362	0.18521	0.0330224	1.03877
genus.Eubacteriumoxidoreducensgroup.id.11339	Keloid || id:ebi-a-GCST90018874	MR Egger	5	0.193139	0.54437	0.74622	0.837089	0.477947	1.4661
genus.Eubacteriumrectalegroup.id.14374	Keloid || id:ebi-a-GCST90018874	MR Egger	8	-1.58262	0.860636	0.115556	0.921568	0.588848	1.44228
genus.Eubacteriumruminantiumgroup.id.11340	Keloid || id:ebi-a-GCST90018874	MR Egger	18	-0.100017	0.401303	0.806353	0.724579	0.299365	1.75376
genus.Eubacteriumventriosumgroup.id.11341	Keloid || id:ebi-a-GCST90018874	MR Egger	15	0.0588403	1.03332	0.955456	0.757177	0.354449	1.61749
genus.Eubacteriumxylanophilumgroup.id.14375	Keloid || id:ebi-a-GCST90018874	MR Egger	9	0.373975	0.81578	0.660539	0.4354	0.0311613	6.08361
genus.Ruminococcusgauvreauiigroup.id.11342	Keloid || id:ebi-a-GCST90018874	MR Egger	12	-0.0709384	0.885479	0.937728	0.983067	0.490983	1.96834
genus.Ruminococcusgnavusgroup.id.14376	Keloid || id:ebi-a-GCST90018874	MR Egger	12	0.0656153	0.662235	0.923031	0.904882	0.526856	1.55415
genus.Ruminococcustorquesgroup.id.14377	Keloid || id:ebi-a-GCST90018874	MR Egger	9	-0.152919	0.410759	0.720697	0.658112	0.241377	1.79434
genus.Actinomyces.id.423	Keloid || id:ebi-a-GCST90018874	MR Egger	7	-0.105297	0.480675	0.835264	1.09888	0.458657	2.63275
genus.Adlercreutzia.id.812	Keloid || id:ebi-a-GCST90018874	MR Egger	8	1.16206	0.854961	0.22295	1.00682	0.33449	3.03056
genus.Akkermansia.id.4037	Keloid || id:ebi-a-GCST90018874	MR Egger	11	-0.91708	0.846451	0.306783	1.19179	0.897418	1.58272
genus.Alistipes.id.968	Keloid || id:ebi-a-GCST90018874	MR Egger	14	0.759707	1.13642	0.516463	1.15457	0.921979	1.44585
genus.Allisonella.id.2174	Keloid || id:ebi-a-GCST90018874	MR Egger	8	0.0198739	1.10057	0.986178	1.158	0.731975	1.83197
genus.Alloprevotella.id.961	Keloid || id:ebi-a-GCST90018874	MR Egger	6	2.15375	1.10094	0.122073	1.22855	0.783706	1.92588
genus.Anaerofilum.id.2053	Keloid || id:ebi-a-GCST90018874	MR Egger	11	0.258169	0.718784	0.727747	0.892024	0.451653	1.76177
genus.Anaerostipes.id.1991	Keloid || id:ebi-a-GCST90018874	MR Egger	13	0.0488992	0.82667	0.953892	0.987196	0.621155	1.56894
genus.Anaerotruncus.id.2054	Keloid || id:ebi-a-GCST90018874	MR Egger	13	-0.845413	0.500804	0.119504	1.01166	0.722865	1.41584
genus.Bacteroides.id.918	Keloid || id:ebi-a-GCST90018874	MR Egger	9	-2.48596	1.5927	0.162529	0.788023	0.360299	1.72351
genus.Barnesiella.id.944	Keloid || id:ebi-a-GCST90018874	MR Egger	14	-0.435478	0.745	0.569688	0.961807	0.595824	1.5526
genus.Bifidobacterium.id.436	Keloid || id:ebi-a-GCST90018874	MR Egger	12	0.330225	0.499109	0.523161	1.72842	0.684993	4.36127
genus.Bilophila.id.3170	Keloid || id:ebi-a-GCST90018874	MR Egger	13	-0.96413	0.947447	0.330724	1.06477	0.806072	1.40648
genus.Blautia.id.1992	Keloid || id:ebi-a-GCST90018874	MR Egger	13	-0.247753	0.701127	0.730495	0.990091	0.810224	1.20989
genus.Butyricicoccus.id.2055	Keloid || id:ebi-a-GCST90018874	MR Egger	8	-0.0503401	0.372603	0.896948	1.0555	0.703984	1.58255
genus.Butyricimonas.id.945	Keloid || id:ebi-a-GCST90018874	MR Egger	13	-0.627923	0.637624	0.345895	1.08127	0.744772	1.5698
genus.Butyrivibrio.id.1993	Keloid || id:ebi-a-GCST90018874	MR Egger	15	0.173478	0.360701	0.638547	1.21305	0.417351	3.52579
genus.CandidatusSoleaferrea.id.11350	Keloid || id:ebi-a-GCST90018874	MR Egger	10	-0.415614	1.60443	0.802144	1.07088	0.724135	1.58366
genus.Catenibacterium.id.2153	Keloid || id:ebi-a-GCST90018874	MR Egger	5	1.88788	2.26462	0.46565	1.04541	0.757918	1.44196
genus.ChristensenellaceaeR.7group.id.11283	Keloid || id:ebi-a-GCST90018874	MR Egger	10	0.546401	0.927608	0.572086	1.12794	0.657844	1.93395
genus.Clostridiumsensustricto1.id.1873	Keloid || id:ebi-a-GCST90018874	MR Egger	7	0.139647	0.779719	0.864891	1.14477	0.692459	1.89253
genus.Collinsella.id.815	Keloid || id:ebi-a-GCST90018874	MR Egger	9	0.262361	1.14996	0.826052	0.205437	0.0380269	1.10986
genus.Coprobacter.id.949	Keloid || id:ebi-a-GCST90018874	MR Egger	11	-0.220868	0.824204	0.794758	0.595195	0.294627	1.20239
genus.Coprococcus1.id.11301	Keloid || id:ebi-a-GCST90018874	MR Egger	11	-0.1541	0.971674	0.877492	0.881589	0.506524	1.53438
genus.Coprococcus2.id.11302	Keloid || id:ebi-a-GCST90018874	MR Egger	8	-0.240491	1.79234	0.89765	0.581341	0.180554	1.87178
genus.Coprococcus3.id.11303	Keloid || id:ebi-a-GCST90018874	MR Egger	9	1.14788	0.978953	0.279325	0.55256	0.201529	1.51504
genus.DefluviitaleaceaeUCG011.id.11287	Keloid || id:ebi-a-GCST90018874	MR Egger	9	-0.464507	0.688056	0.521279	0.904822	0.412066	1.98682
genus.Desulfovibrio.id.3173	Keloid || id:ebi-a-GCST90018874	MR Egger	10	0.639169	0.526973	0.259762	1.20152	0.893048	1.61655
genus.Dialister.id.2183	Keloid || id:ebi-a-GCST90018874	MR Egger	11	-1.24854	1.03874	0.260045	1.0159	0.814754	1.26671
genus.Dorea.id.1997	Keloid || id:ebi-a-GCST90018874	MR Egger	10	-0.0539458	0.643973	0.935297	1.31	0.75922	2.26034
genus.Eggerthella.id.819	Keloid || id:ebi-a-GCST90018874	MR Egger	11	0.591087	0.899682	0.527625	1.32414	0.799349	2.19346
genus.Eisenbergiella.id.11304	Keloid || id:ebi-a-GCST90018874	MR Egger	11	0.648401	0.819986	0.449427	1.06061	0.139952	8.03768
genus.Enterorhabdus.id.820	Keloid || id:ebi-a-GCST90018874	MR Egger	6	0.206223	0.39404	0.628381	0.860486	0.499406	1.48263
genus.Erysipelatoclostridium.id.11381	Keloid || id:ebi-a-GCST90018874	MR Egger	15	-0.0738566	0.53028	0.891365	1.04425	0.688825	1.58306
genus.ErysipelotrichaceaeUCG003.id.11384	Keloid || id:ebi-a-GCST90018874	MR Egger	16	-0.196619	0.425424	0.651058	0.812134	0.323733	2.03736
genus.Escherichia.Shigella.id.3504	Keloid || id:ebi-a-GCST90018874	MR Egger	10	-1.35762	0.773638	0.117362	0.781726	0.387404	1.57741
genus.Faecalibacterium.id.2057	Keloid || id:ebi-a-GCST90018874	MR Egger	10	0.0369026	0.394791	0.927826	1.4535	0.293772	7.19152
genus.FamilyXIIIAD3011group.id.11293	Keloid || id:ebi-a-GCST90018874	MR Egger	13	-0.12152	0.855199	0.889573	0.70165	0.38809	1.26855
genus.FamilyXIIIUCG001.id.11294	Keloid || id:ebi-a-GCST90018874	MR Egger	8	-0.408704	0.647869	0.5514	0.730988	0.467742	1.14239
genus.Flavonifractor.id.2059	Keloid || id:ebi-a-GCST90018874	MR Egger	5	-0.676472	1.8922	0.744385	0.656547	0.247268	1.74327
genus.Fusicatenibacter.id.11305	Keloid || id:ebi-a-GCST90018874	MR Egger	18	0.786848	0.628076	0.228283	0.729865	0.298408	1.78515
genus.Gordonibacter.id.821	Keloid || id:ebi-a-GCST90018874	MR Egger	12	-0.0229888	0.413556	0.956765	0.931519	0.164232	5.28357
genus.Haemophilus.id.3698	Keloid || id:ebi-a-GCST90018874	MR Egger	9	0.304769	0.400217	0.471224	1.08283	0.653256	1.7949
genus.Holdemanella.id.11393	Keloid || id:ebi-a-GCST90018874	MR Egger	11	0.712688	0.555528	0.231578	0.982137	0.682715	1.41288
genus.Holdemania.id.2157	Keloid || id:ebi-a-GCST90018874	MR Egger	15	-0.168052	0.624199	0.791979	0.961106	0.444878	2.07635
genus.Howardella.id.2000	Keloid || id:ebi-a-GCST90018874	MR Egger	10	0.713418	0.411093	0.120883	1.07128	0.515406	2.22667
genus.Hungatella.id.11306	Keloid || id:ebi-a-GCST90018874	MR Egger	5	-1.20296	1.13921	0.368504	1.06782	0.291602	3.91023
genus.Intestinibacter.id.11345	Keloid || id:ebi-a-GCST90018874	MR Egger	15	0.234069	0.581738	0.693956	1.19595	0.856978	1.66901
genus.Intestinimonas.id.2062	Keloid || id:ebi-a-GCST90018874	MR Egger	17	-0.14137	0.337679	0.681404	1.11409	0.868948	1.42839
genus.Lachnoclostridium.id.11308	Keloid || id:ebi-a-GCST90018874	MR Egger	13	-0.226944	1.04412	0.831912	1.27552	0.691064	2.35425
genus.Lachnospira.id.2004	Keloid || id:ebi-a-GCST90018874	MR Egger	6	-0.634301	1.8575	0.749926	1.2933	0.759028	2.20364
genus.LachnospiraceaeFCS020group.id.11314	Keloid || id:ebi-a-GCST90018874	MR Egger	12	0.0927547	0.329022	0.78376	0.8582	0.383657	1.9197
genus.LachnospiraceaeNC2004group.id.11316	Keloid || id:ebi-a-GCST90018874	MR Egger	9	-0.553411	0.588829	0.378585	1.00991	0.605901	1.68332
genus.LachnospiraceaeND3007group.id.11317	Keloid || id:ebi-a-GCST90018874	MR Egger	3	2.14007	7.10692	0.813796	1.07344	0.738191	1.56093
genus.LachnospiraceaeNK4A136group.id.11319	Keloid || id:ebi-a-GCST90018874	MR Egger	15	-0.323928	0.339112	0.356891	1.53046	0.610761	3.83504
genus.LachnospiraceaeUCG001.id.11321	Keloid || id:ebi-a-GCST90018874	MR Egger	13	0.263986	0.767773	0.737454	0.963676	0.599134	1.55002
genus.LachnospiraceaeUCG004.id.11324	Keloid || id:ebi-a-GCST90018874	MR Egger	12	-1.40503	1.05038	0.210641	0.900057	0.350842	2.30903
genus.LachnospiraceaeUCG008.id.11328	Keloid || id:ebi-a-GCST90018874	MR Egger	11	-0.504645	1.05912	0.64509	1.10881	0.710925	1.72938
genus.LachnospiraceaeUCG010.id.11330	Keloid || id:ebi-a-GCST90018874	MR Egger	10	0.681325	0.543008	0.244993	0.929971	0.668178	1.29433
genus.Lactobacillus.id.1837	Keloid || id:ebi-a-GCST90018874	MR Egger	10	0.793559	0.390089	0.0763457	1.14693	0.590585	2.22735
genus.Lactococcus.id.1851	Keloid || id:ebi-a-GCST90018874	MR Egger	9	0.522419	0.629394	0.433911	1.15721	0.693434	1.93117
genus.Marvinbryantia.id.2005	Keloid || id:ebi-a-GCST90018874	MR Egger	10	1.25744	0.98475	0.237448	3.19651	0.5983	17.0779
genus.Methanobrevibacter.id.123	Keloid || id:ebi-a-GCST90018874	MR Egger	6	-0.255945	0.502862	0.63756	1.35496	0.856905	2.14249
genus.Odoribacter.id.952	Keloid || id:ebi-a-GCST90018874	MR Egger	7	0.665949	1.61444	0.697067	1.30029	0.893976	1.89128
genus.Olsenella.id.822	Keloid || id:ebi-a-GCST90018874	MR Egger	11	1.08536	0.487831	0.0531394	1.42564	0.728025	2.79174
genus.Oscillibacter.id.2063	Keloid || id:ebi-a-GCST90018874	MR Egger	14	-0.725928	0.62126	0.265304	1.40475	0.777662	2.53749
genus.Oscillospira.id.2064	Keloid || id:ebi-a-GCST90018874	MR Egger	8	2.12195	1.02163	0.0830769	0.399684	0.0760683	2.10005
genus.Oxalobacter.id.2978	Keloid || id:ebi-a-GCST90018874	MR Egger	11	-0.255225	0.697824	0.723005	0.933968	0.569695	1.53116
genus.Parabacteroides.id.954	Keloid || id:ebi-a-GCST90018874	MR Egger	6	1.72306	1.55265	0.329324	0.845429	0.585489	1.22078
genus.Paraprevotella.id.962	Keloid || id:ebi-a-GCST90018874	MR Egger	13	-0.388198	0.513731	0.465736	0.976276	0.424185	2.24693
genus.Parasutterella.id.2892	Keloid || id:ebi-a-GCST90018874	MR Egger	15	0.170572	0.453754	0.713045	0.989892	0.492816	1.98834
genus.Peptococcus.id.2037	Keloid || id:ebi-a-GCST90018874	MR Egger	12	0.094989	0.489843	0.850123	2.13765	0.23046	19.828
genus.Phascolarctobacterium.id.2168	Keloid || id:ebi-a-GCST90018874	MR Egger	9	-0.352921	1.10119	0.757952	1.33198	0.72855	2.43522
genus.Prevotella7.id.11182	Keloid || id:ebi-a-GCST90018874	MR Egger	11	0.333849	1.04911	0.757578	1.10878	0.717051	1.7145
genus.Prevotella9.id.11183	Keloid || id:ebi-a-GCST90018874	MR Egger	15	-0.144222	0.554888	0.799002	1.61291	0.550054	4.72952
genus.RikenellaceaeRC9gutgroup.id.11191	Keloid || id:ebi-a-GCST90018874	MR Egger	11	0.0690585	0.819288	0.93467	1.65918	0.683253	4.02905
genus.Romboutsia.id.11347	Keloid || id:ebi-a-GCST90018874	MR Egger	13	0.321813	0.515032	0.544819	1.02007	0.11798	8.8197
genus.Roseburia.id.2012	Keloid || id:ebi-a-GCST90018874	MR Egger	13	1.26545	0.698058	0.0972122	0.980206	0.745681	1.28849
genus.Ruminiclostridium5.id.11355	Keloid || id:ebi-a-GCST90018874	MR Egger	11	-0.584413	0.746288	0.453685	1.00276	0.747419	1.34533
genus.Ruminiclostridium6.id.11356	Keloid || id:ebi-a-GCST90018874	MR Egger	15	0.586993	0.53366	0.29131	0.939067	0.605401	1.45663
genus.Ruminiclostridium9.id.11357	Keloid || id:ebi-a-GCST90018874	MR Egger	9	-0.456897	1.01471	0.666128	0.943853	0.649698	1.37119
genus.RuminococcaceaeNK4A214group.id.11358	Keloid || id:ebi-a-GCST90018874	MR Egger	13	-0.121337	0.66122	0.857741	8.61709	0.995922	74.5583
genus.RuminococcaceaeUCG002.id.11360	Keloid || id:ebi-a-GCST90018874	MR Egger	22	-0.289203	0.378647	0.453915	1.19966	0.875366	1.64409
genus.RuminococcaceaeUCG003.id.11361	Keloid || id:ebi-a-GCST90018874	MR Egger	12	0.130815	0.628102	0.839198	1.13598	0.857281	1.50528
genus.RuminococcaceaeUCG004.id.11362	Keloid || id:ebi-a-GCST90018874	MR Egger	11	0.272513	0.99269	0.789882	1.26904	0.763425	2.10952
genus.RuminococcaceaeUCG005.id.11363	Keloid || id:ebi-a-GCST90018874	MR Egger	14	-0.0885616	0.530748	0.870257	1.3476	0.847241	2.14345
genus.RuminococcaceaeUCG009.id.11366	Keloid || id:ebi-a-GCST90018874	MR Egger	12	-0.0367173	0.688058	0.958493	1.29456	0.316432	5.29618
genus.RuminococcaceaeUCG010.id.11367	Keloid || id:ebi-a-GCST90018874	MR Egger	6	0.611556	1.00622	0.576154	1.0256	0.746703	1.40866
genus.RuminococcaceaeUCG011.id.11368	Keloid || id:ebi-a-GCST90018874	MR Egger	8	0.159452	0.586838	0.794949	0.994802	0.77921	1.27004
genus.RuminococcaceaeUCG013.id.11370	Keloid || id:ebi-a-GCST90018874	MR Egger	12	-0.400522	0.908072	0.668546	1.10704	0.71578	1.71218
genus.RuminococcaceaeUCG014.id.11371	Keloid || id:ebi-a-GCST90018874	MR Egger	11	0.353586	0.606774	0.574382	1.07289	0.713029	1.61437
genus.Ruminococcus1.id.11373	Keloid || id:ebi-a-GCST90018874	MR Egger	10	-0.509307	0.598171	0.41928	1.05011	0.20776	5.30777
genus.Ruminococcus2.id.11374	Keloid || id:ebi-a-GCST90018874	MR Egger	15	-0.522681	0.340027	0.148226	0.756722	0.42769	1.33889
genus.Sellimonas.id.14369	Keloid || id:ebi-a-GCST90018874	MR Egger	9	1.06746	0.823151	0.235809	0.779723	0.506499	1.20033
genus.Senegalimassilia.id.11160	Keloid || id:ebi-a-GCST90018874	MR Egger	5	0.207692	0.716695	0.79085	0.848489	0.321142	2.24179
genus.Slackia.id.825	Keloid || id:ebi-a-GCST90018874	MR Egger	6	0.259405	0.821794	0.768046	0.64475	0.278188	1.49433
genus.Streptococcus.id.1853	Keloid || id:ebi-a-GCST90018874	MR Egger	15	0.877859	0.773068	0.276646	0.42938	0.160897	1.14587
genus.Subdoligranulum.id.2070	Keloid || id:ebi-a-GCST90018874	MR Egger	11	0.415175	0.510135	0.436732	0.772907	0.452182	1.32112
genus.Sutterella.id.2896	Keloid || id:ebi-a-GCST90018874	MR Egger	12	-1.36726	1.28633	0.312813	0.808815	0.566039	1.15572
genus.Terrisporobacter.id.11348	Keloid || id:ebi-a-GCST90018874	MR Egger	5	-0.446843	0.463221	0.405882	0.499849	0.192172	1.30013
genus.Turicibacter.id.2162	Keloid || id:ebi-a-GCST90018874	MR Egger	10	2.5034	0.7892	0.0131535	0.503534	0.212301	1.19428
genus.Tyzzerella3.id.11335	Keloid || id:ebi-a-GCST90018874	MR Egger	13	0.766805	0.619231	0.241375	0.0832457	0.00366966	1.88842
genus.Veillonella.id.2198	Keloid || id:ebi-a-GCST90018874	MR Egger	8	3.27081	1.76121	0.112671	0.972778	0.467851	2.02264
genus.Victivallis.id.2256	Keloid || id:ebi-a-GCST90018874	MR Egger	10	0.345515	0.726441	0.647056	0.72675	0.395381	1.33584
order.Actinomycetales.id.420	Keloid || id:ebi-a-GCST90018874	MR Egger	5	-0.960474	0.644013	0.232661	1.29583	0.366278	4.58442
order.Bacillales.id.1674	Keloid || id:ebi-a-GCST90018874	MR Egger	9	0.0517742	0.601515	0.933819	1.29583	0.392655	4.27645
order.Bacteroidales.id.913	Keloid || id:ebi-a-GCST90018874	MR Egger	14	0.165797	0.339988	0.634582	0.646956	0.150217	2.78632
order.Bifidobacteriales.id.432	Keloid || id:ebi-a-GCST90018874	MR Egger	12	0.480476	0.636883	0.467992	1.0108	0.60697	1.68331
order.Burkholderiales.id.2874	Keloid || id:ebi-a-GCST90018874	MR Egger	11	0.636425	0.92191	0.507395	1.00663	0.677075	1.49658
order.Clostridiales.id.1863	Keloid || id:ebi-a-GCST90018874	MR Egger	13	0.793107	0.971912	0.431801	0.843154	0.359743	1.97616
order.Coriobacteriales.id.810	Keloid || id:ebi-a-GCST90018874	MR Egger	14	0.700403	0.821607	0.41064	0.952972	0.466011	1.94878
order.Desulfovibrionales.id.3156	Keloid || id:ebi-a-GCST90018874	MR Egger	12	0.226371	0.523222	0.674452	1.39128	0.523076	3.70054
order.Enterobacteriales.id.3468	Keloid || id:ebi-a-GCST90018874	MR Egger	7	0.0396229	1.56547	0.980786	1.21237	0.783263	1.87656
order.Erysipelotrichales.id.2148	Keloid || id:ebi-a-GCST90018874	MR Egger	13	0.753709	1.07727	0.498676	1.20372	0.866031	1.6731
order.Gastranaerophilales.id.1591	Keloid || id:ebi-a-GCST90018874	MR Egger	9	-0.0324759	0.581491	0.957023	1.26192	0.677579	2.35021
order.Lactobacillales.id.1800	Keloid || id:ebi-a-GCST90018874	MR Egger	15	0.0513528	0.487915	0.917784	1.25768	0.691027	2.28899
order.Methanobacteriales.id.120	Keloid || id:ebi-a-GCST90018874	MR Egger	10	-0.0546695	0.473806	0.910985	0.381315	0.0595388	2.44212
order.MollicutesRF9.id.11579	Keloid || id:ebi-a-GCST90018874	MR Egger	13	0.501373	0.652362	0.458343	1.07942	0.666869	1.74719
order.NB1n.id.3953	Keloid || id:ebi-a-GCST90018874	MR Egger	13	-0.445697	0.442779	0.335761	1.07748	0.771979	1.50388
order.Pasteurellales.id.3688	Keloid || id:ebi-a-GCST90018874	MR Egger	14	0.340413	0.368255	0.373496	1.04281	0.48639	2.23576
order.Rhodospirillales.id.2667	Keloid || id:ebi-a-GCST90018874	MR Egger	14	0.389856	0.902203	0.67332	1.12505	0.552339	2.29158
order.Selenomonadales.id.2165	Keloid || id:ebi-a-GCST90018874	MR Egger	12	-0.472167	0.897842	0.610427	0.780553	0.197511	3.0847
order.Verrucomicrobiales.id.4030	Keloid || id:ebi-a-GCST90018874	MR Egger	11	-0.911628	0.847552	0.310093	1.52708	0.885287	2.63416
order.Victivallales.id.2254	Keloid || id:ebi-a-GCST90018874	MR Egger	8	-0.798746	0.547516	0.194887	1.27348	0.842073	1.92592
phylum.Actinobacteria.id.400	Keloid || id:ebi-a-GCST90018874	MR Egger	15	0.00167883	1.08943	0.998794	1.64125	0.739678	3.64173
phylum.Bacteroidetes.id.905	Keloid || id:ebi-a-GCST90018874	MR Egger	12	-0.0320785	0.358843	0.930534	1.58688	0.728825	3.45516
phylum.Cyanobacteria.id.1500	Keloid || id:ebi-a-GCST90018874	MR Egger	8	-0.456418	0.682897	0.528765	0.950906	0.458112	1.9738
phylum.Euryarchaeota.id.55	Keloid || id:ebi-a-GCST90018874	MR Egger	12	-0.540282	0.417055	0.224264	1.28635	0.761123	2.174
phylum.Firmicutes.id.1672	Keloid || id:ebi-a-GCST90018874	MR Egger	16	0.0385564	0.499528	0.939568	1.34033	0.896263	2.00443
phylum.Lentisphaerae.id.2238	Keloid || id:ebi-a-GCST90018874	MR Egger	9	-0.631058	0.574811	0.308591	1.48189	0.607867	3.61262
phylum.Proteobacteria.id.2375	Keloid || id:ebi-a-GCST90018874	MR Egger	12	-0.734747	0.760227	0.356594	1.19579	0.695534	2.05584
phylum.Tenericutes.id.3919	Keloid || id:ebi-a-GCST90018874	MR Egger	12	0.292267	0.800897	0.722767	0.533699	0.152947	1.86231
phylum.Verrucomicrobia.id.3982	Keloid || id:ebi-a-GCST90018874	MR Egger	12	0.208338	0.380179	0.595712	1.02694	0.623117	1.69248

## Sheet: Simple Mode
id.exposure	outcome	method	nsnp	b	se	p	OR	OR_lci95	OR_uci95
class.Actinobacteria.id.419	Keloid || id:ebi-a-GCST90018874	Simple mode	15	-0.108445	0.367159	0.772052	1.00988	0.698825	1.4594
class.Alphaproteobacteria.id.2379	Keloid || id:ebi-a-GCST90018874	Simple mode	7	0.0763744	0.451409	0.871206	0.804292	0.347385	1.86216
class.Bacilli.id.1673	Keloid || id:ebi-a-GCST90018874	Simple mode	18	-0.0148015	0.344222	0.966203	1.34016	0.628783	2.85636
class.Bacteroidia.id.912	Keloid || id:ebi-a-GCST90018874	Simple mode	14	0.0636701	0.364942	0.864187	1.18943	0.586551	2.41199
class.Betaproteobacteria.id.2867	Keloid || id:ebi-a-GCST90018874	Simple mode	12	0.215571	0.637477	0.741607	1.08662	0.870438	1.35648
class.Clostridia.id.1859	Keloid || id:ebi-a-GCST90018874	Simple mode	12	0.160571	0.508795	0.758219	1.00605	0.854894	1.18392
class.Coriobacteriia.id.809	Keloid || id:ebi-a-GCST90018874	Simple mode	14	-0.0390441	0.468587	0.934864	1.08087	0.741326	1.57595
class.Deltaproteobacteria.id.3087	Keloid || id:ebi-a-GCST90018874	Simple mode	13	0.2625	0.478805	0.59358	1.10863	0.775641	1.58457
class.Erysipelotrichia.id.2147	Keloid || id:ebi-a-GCST90018874	Simple mode	13	-0.144262	0.508734	0.781572	0.659935	0.0284305	15.3185
class.Gammaproteobacteria.id.3303	Keloid || id:ebi-a-GCST90018874	Simple mode	6	-0.568382	0.54755	0.346819	0.976277	0.681384	1.39879
class.Lentisphaeria.id.2250	Keloid || id:ebi-a-GCST90018874	Simple mode	8	-0.0488638	0.293705	0.872569	0.855767	0.643229	1.13853
class.Melainabacteria.id.1589	Keloid || id:ebi-a-GCST90018874	Simple mode	10	-0.661146	0.329105	0.0754596	1.01852	0.589914	1.75852
class.Methanobacteria.id.119	Keloid || id:ebi-a-GCST90018874	Simple mode	10	0.0249228	0.24077	0.919826	1.01852	0.605646	1.71284
class.Mollicutes.id.3920	Keloid || id:ebi-a-GCST90018874	Simple mode	12	-0.119808	0.467652	0.802531	6.60536	0.0780206	559.221
class.Negativicutes.id.2164	Keloid || id:ebi-a-GCST90018874	Simple mode	12	0.639826	0.429301	0.164228	0.938254	0.60615	1.45231
class.Verrucomicrobiae.id.4029	Keloid || id:ebi-a-GCST90018874	Simple mode	11	-0.0232307	0.38347	0.952887	0.910585	0.59581	1.39166
family.Acidaminococcaceae.id.2166	Keloid || id:ebi-a-GCST90018874	Simple mode	7	-0.0582784	0.417854	0.893642	0.744411	0.357934	1.54818
family.Actinomycetaceae.id.421	Keloid || id:ebi-a-GCST90018874	Simple mode	5	0.306842	0.396829	0.482538	1.02896	0.558295	1.89643
family.Alcaligenaceae.id.2875	Keloid || id:ebi-a-GCST90018874	Simple mode	12	0.0967423	0.538475	0.860686	1.72703	0.280351	10.6389
family.Bacteroidaceae.id.917	Keloid || id:ebi-a-GCST90018874	Simple mode	9	0.25915	0.630766	0.691967	0.733869	0.393728	1.36786
family.BacteroidalesS24.7group.id.11173	Keloid || id:ebi-a-GCST90018874	Simple mode	8	-0.0436104	0.305043	0.890346	0.960572	0.547022	1.68677
family.Bifidobacteriaceae.id.433	Keloid || id:ebi-a-GCST90018874	Simple mode	12	0.323598	0.382864	0.416003	0.702103	0.277802	1.77446
family.Christensenellaceae.id.1866	Keloid || id:ebi-a-GCST90018874	Simple mode	11	0.135173	0.308618	0.670701	0.714958	0.355301	1.43868
family.Clostridiaceae1.id.1869	Keloid || id:ebi-a-GCST90018874	Simple mode	10	-0.106493	0.500288	0.836177	1.14987	0.249423	5.30101
family.ClostridialesvadinBB60group.id.11286	Keloid || id:ebi-a-GCST90018874	Simple mode	15	-0.27611	0.360426	0.45636	0.817705	0.473391	1.41245
family.Coriobacteriaceae.id.811	Keloid || id:ebi-a-GCST90018874	Simple mode	14	-0.0390441	0.489448	0.937634	0.898638	0.525499	1.53673
family.Defluviitaleaceae.id.1924	Keloid || id:ebi-a-GCST90018874	Simple mode	11	0.0437642	0.307366	0.889604	0.863251	0.434208	1.71624
family.Desulfovibrionaceae.id.3169	Keloid || id:ebi-a-GCST90018874	Simple mode	10	0.302029	0.510872	0.568934	0.834874	0.481954	1.44623
family.Enterobacteriaceae.id.3469	Keloid || id:ebi-a-GCST90018874	Simple mode	7	0.172689	0.437755	0.706861	1.3	0.136483	12.3824
family.Erysipelotrichaceae.id.2149	Keloid || id:ebi-a-GCST90018874	Simple mode	13	-0.144262	0.509012	0.781688	1.5557	0.813689	2.97437
family.FamilyXI.id.1936	Keloid || id:ebi-a-GCST90018874	Simple mode	8	0.183282	0.211587	0.415068	1.16382	0.683846	1.98068
family.FamilyXIII.id.1957	Keloid || id:ebi-a-GCST90018874	Simple mode	10	0.0404454	0.621745	0.949555	2.26353	0.706965	7.24727
family.Lachnospiraceae.id.1987	Keloid || id:ebi-a-GCST90018874	Simple mode	17	0.191831	0.459698	0.682007	1.97946	0.636747	6.15357
family.Lactobacillaceae.id.1836	Keloid || id:ebi-a-GCST90018874	Simple mode	9	0.402545	0.235516	0.125788	0.801823	0.159405	4.03325
family.Methanobacteriaceae.id.121	Keloid || id:ebi-a-GCST90018874	Simple mode	10	0.0249228	0.252757	0.923614	0.893252	0.601412	1.32671
family.Oxalobacteraceae.id.2966	Keloid || id:ebi-a-GCST90018874	Simple mode	14	0.335634	0.337884	0.338674	0.851978	0.613497	1.18316
family.Pasteurellaceae.id.3689	Keloid || id:ebi-a-GCST90018874	Simple mode	14	0.129792	0.283909	0.655102	1.07055	0.534807	2.14296
family.Peptococcaceae.id.2024	Keloid || id:ebi-a-GCST90018874	Simple mode	9	-0.558304	0.388296	0.188424	0.978105	0.486168	1.96782
family.Peptostreptococcaceae.id.2042	Keloid || id:ebi-a-GCST90018874	Simple mode	14	0.146255	0.419081	0.732684	0.857186	0.127635	5.75679
family.Porphyromonadaceae.id.943	Keloid || id:ebi-a-GCST90018874	Simple mode	9	0.290123	0.627461	0.656127	0.604841	0.309756	1.18104
family.Prevotellaceae.id.960	Keloid || id:ebi-a-GCST90018874	Simple mode	16	0.506805	0.479886	0.307639	0.819197	0.450691	1.48901
family.Rhodospirillaceae.id.2717	Keloid || id:ebi-a-GCST90018874	Simple mode	15	-0.443675	0.370779	0.251334	0.424459	0.108744	1.65678
family.Rikenellaceae.id.967	Keloid || id:ebi-a-GCST90018874	Simple mode	19	0.265525	0.340783	0.446008	0.400403	0.0961438	1.66753
family.Ruminococcaceae.id.2050	Keloid || id:ebi-a-GCST90018874	Simple mode	10	-0.383322	0.401271	0.364395	0.786242	0.0234359	26.3773
family.Streptococcaceae.id.1850	Keloid || id:ebi-a-GCST90018874	Simple mode	14	0.512474	0.411534	0.235009	0.664249	0.382077	1.15481
family.Veillonellaceae.id.2172	Keloid || id:ebi-a-GCST90018874	Simple mode	19	0.0716271	0.353825	0.841846	0.61979	0.400245	0.959762
family.Verrucomicrobiaceae.id.4036	Keloid || id:ebi-a-GCST90018874	Simple mode	11	-0.023184	0.412822	0.956321	0.648842	0.28332	1.48594
family.Victivallaceae.id.2255	Keloid || id:ebi-a-GCST90018874	Simple mode	12	0.146927	0.213743	0.506064	0.641873	0.29958	1.37526
genus.Clostridiuminnocuumgroup.id.14397	Keloid || id:ebi-a-GCST90018874	Simple mode	9	0.139029	0.302231	0.657753	3.15152	0.462613	21.4695
genus.Eubacteriumbrachygroup.id.11296	Keloid || id:ebi-a-GCST90018874	Simple mode	10	0.0694125	0.249287	0.786963	0.702244	0.365074	1.35082
genus.Eubacteriumcoprostanoligenesgroup.id.11375	Keloid || id:ebi-a-GCST90018874	Simple mode	13	-0.322164	0.450984	0.488669	0.840962	0.517989	1.36531
genus.Eubacteriumeligensgroup.id.14372	Keloid || id:ebi-a-GCST90018874	Simple mode	7	-0.41838	0.511743	0.444854	0.629904	0.211025	1.88025
genus.Eubacteriumfissicatenagroup.id.14373	Keloid || id:ebi-a-GCST90018874	Simple mode	9	0.14669	0.23403	0.548256	0.600955	0.22523	1.60346
genus.Eubacteriumhalliigroup.id.11338	Keloid || id:ebi-a-GCST90018874	Simple mode	16	-0.238227	0.399282	0.559646	0.628445	0.163148	2.42076
genus.Eubacteriumnodatumgroup.id.11297	Keloid || id:ebi-a-GCST90018874	Simple mode	11	0.0540185	0.206642	0.799081	0.992142	0.645676	1.52452
genus.Eubacteriumoxidoreducensgroup.id.11339	Keloid || id:ebi-a-GCST90018874	Simple mode	5	0.120389	0.27509	0.684245	1.02749	0.730334	1.44555
genus.Eubacteriumrectalegroup.id.14374	Keloid || id:ebi-a-GCST90018874	Simple mode	8	-0.542417	0.596586	0.393471	1.04811	0.568821	1.93126
genus.Eubacteriumruminantiumgroup.id.11340	Keloid || id:ebi-a-GCST90018874	Simple mode	18	0.270025	0.278311	0.345535	1.03119	0.5782	1.83906
genus.Eubacteriumventriosumgroup.id.11341	Keloid || id:ebi-a-GCST90018874	Simple mode	15	-0.20809	0.469259	0.664221	1.89491	0.674558	5.323
genus.Eubacteriumxylanophilumgroup.id.14375	Keloid || id:ebi-a-GCST90018874	Simple mode	9	-0.420762	0.498226	0.422914	1.04844	0.67834	1.62047
genus.Ruminococcusgauvreauiigroup.id.11342	Keloid || id:ebi-a-GCST90018874	Simple mode	12	-0.0396707	0.393002	0.921412	1.17317	0.845339	1.62814
genus.Ruminococcusgnavusgroup.id.14376	Keloid || id:ebi-a-GCST90018874	Simple mode	12	0.243351	0.31269	0.452838	1.00963	0.550222	1.85261
genus.Ruminococcustorquesgroup.id.14377	Keloid || id:ebi-a-GCST90018874	Simple mode	9	0.425565	0.468681	0.390407	1.00038	0.55831	1.79249
genus.Actinomyces.id.423	Keloid || id:ebi-a-GCST90018874	Simple mode	7	0.137086	0.338636	0.699649	0.286924	0.0374604	2.19766
genus.Adlercreutzia.id.812	Keloid || id:ebi-a-GCST90018874	Simple mode	8	0.354622	0.342879	0.335423	0.818028	0.471683	1.41868
genus.Akkermansia.id.4037	Keloid || id:ebi-a-GCST90018874	Simple mode	11	-0.0240098	0.425294	0.956092	0.790662	0.525565	1.18948
genus.Alistipes.id.968	Keloid || id:ebi-a-GCST90018874	Simple mode	14	0.478043	0.548868	0.399573	0.735987	0.286515	1.89057
genus.Allisonella.id.2174	Keloid || id:ebi-a-GCST90018874	Simple mode	8	-0.0628683	0.223977	0.787062	0.877594	0.353962	2.17586
genus.Alloprevotella.id.961	Keloid || id:ebi-a-GCST90018874	Simple mode	6	0.23826	0.259286	0.400302	0.947483	0.26817	3.34759
genus.Anaerofilum.id.2053	Keloid || id:ebi-a-GCST90018874	Simple mode	11	0.101692	0.222487	0.657389	1.16219	0.60715	2.22462
genus.Anaerostipes.id.1991	Keloid || id:ebi-a-GCST90018874	Simple mode	13	-0.164298	0.495701	0.746024	0.99763	0.623935	1.59514
genus.Anaerotruncus.id.2054	Keloid || id:ebi-a-GCST90018874	Simple mode	13	-0.69345	0.48771	0.180537	1.31983	0.461807	3.77201
genus.Bacteroides.id.918	Keloid || id:ebi-a-GCST90018874	Simple mode	9	0.25915	0.64465	0.698209	1.2945	0.581845	2.88003
genus.Barnesiella.id.944	Keloid || id:ebi-a-GCST90018874	Simple mode	14	-0.170606	0.434571	0.700988	1.80595	0.309657	10.5325
genus.Bifidobacterium.id.436	Keloid || id:ebi-a-GCST90018874	Simple mode	12	0.232638	0.317279	0.478755	1.00857	0.691931	1.47011
genus.Bilophila.id.3170	Keloid || id:ebi-a-GCST90018874	Simple mode	13	0.0419187	0.389114	0.915991	0.984171	0.735746	1.31648
genus.Blautia.id.1992	Keloid || id:ebi-a-GCST90018874	Simple mode	13	0.495459	0.406633	0.246468	0.827483	0.434437	1.57613
genus.Butyricicoccus.id.2055	Keloid || id:ebi-a-GCST90018874	Simple mode	8	0.393317	0.454651	0.415647	0.841004	0.475622	1.48708
genus.Butyricimonas.id.945	Keloid || id:ebi-a-GCST90018874	Simple mode	13	-0.217793	0.428331	0.620343	1.91248	0.383363	9.54076
genus.Butyrivibrio.id.1993	Keloid || id:ebi-a-GCST90018874	Simple mode	15	0.0777708	0.192391	0.692148	0.944204	0.6842	1.30301
genus.CandidatusSoleaferrea.id.11350	Keloid || id:ebi-a-GCST90018874	Simple mode	10	0.0183481	0.278636	0.948937	1.02203	0.813422	1.28413
genus.Catenibacterium.id.2153	Keloid || id:ebi-a-GCST90018874	Simple mode	5	-0.295162	0.373594	0.473692	0.951825	0.555383	1.63125
genus.ChristensenellaceaeR.7group.id.11283	Keloid || id:ebi-a-GCST90018874	Simple mode	10	-0.353675	0.473048	0.473752	0.941928	0.587644	1.5098
genus.Clostridiumsensustricto1.id.1873	Keloid || id:ebi-a-GCST90018874	Simple mode	7	-0.147049	0.350604	0.689514	1.22903	0.567738	2.66058
genus.Collinsella.id.815	Keloid || id:ebi-a-GCST90018874	Simple mode	9	0.816925	0.593724	0.206129	0.690592	0.455868	1.04617
genus.Coprobacter.id.949	Keloid || id:ebi-a-GCST90018874	Simple mode	11	0.0681692	0.354091	0.851189	0.750869	0.548057	1.02873
genus.Coprococcus1.id.11301	Keloid || id:ebi-a-GCST90018874	Simple mode	11	-0.85694	0.694803	0.245647	0.613604	0.335332	1.1228
genus.Coprococcus2.id.11302	Keloid || id:ebi-a-GCST90018874	Simple mode	8	-0.432566	0.422761	0.34027	0.99028	0.6541	1.49924
genus.Coprococcus3.id.11303	Keloid || id:ebi-a-GCST90018874	Simple mode	9	-0.462187	0.557955	0.431484	0.928805	0.328504	2.62608
genus.DefluviitaleaceaeUCG011.id.11287	Keloid || id:ebi-a-GCST90018874	Simple mode	9	0.0469904	0.311827	0.883948	1.09168	0.74957	1.58993
genus.Desulfovibrio.id.3173	Keloid || id:ebi-a-GCST90018874	Simple mode	10	0.00958017	0.3097	0.975998	0.942866	0.714204	1.24474
genus.Dialister.id.2183	Keloid || id:ebi-a-GCST90018874	Simple mode	11	-0.306543	0.481337	0.538523	1.07177	0.630841	1.82088
genus.Dorea.id.1997	Keloid || id:ebi-a-GCST90018874	Simple mode	10	0.2775	0.535769	0.616986	1.13927	0.719021	1.80514
genus.Eggerthella.id.819	Keloid || id:ebi-a-GCST90018874	Simple mode	11	-0.189366	0.328744	0.577329	0.821503	0.356846	1.8912
genus.Eisenbergiella.id.11304	Keloid || id:ebi-a-GCST90018874	Simple mode	11	-0.0493746	0.274859	0.861026	0.807343	0.522075	1.24849
genus.Enterorhabdus.id.820	Keloid || id:ebi-a-GCST90018874	Simple mode	6	-0.488406	0.30828	0.17398	0.833982	0.611049	1.13825
genus.Erysipelatoclostridium.id.11381	Keloid || id:ebi-a-GCST90018874	Simple mode	15	0.0693083	0.270413	0.801443	1.26287	0.515865	3.0916
genus.ErysipelotrichaceaeUCG003.id.11384	Keloid || id:ebi-a-GCST90018874	Simple mode	16	0.23339	0.456785	0.616831	1.30673	0.619766	2.75516
genus.Escherichia.Shigella.id.3504	Keloid || id:ebi-a-GCST90018874	Simple mode	10	0.00932154	0.495715	0.985408	0.257272	0.0564752	1.17199
genus.Faecalibacterium.id.2057	Keloid || id:ebi-a-GCST90018874	Simple mode	10	-0.184237	0.397753	0.654222	0.956004	0.511419	1.78707
genus.FamilyXIIIAD3011group.id.11293	Keloid || id:ebi-a-GCST90018874	Simple mode	13	0.551618	0.406756	0.200024	1.04791	0.634973	1.7294
genus.FamilyXIIIUCG001.id.11294	Keloid || id:ebi-a-GCST90018874	Simple mode	8	-0.362837	0.401836	0.396561	1.00937	0.382021	2.66692
genus.Flavonifractor.id.2059	Keloid || id:ebi-a-GCST90018874	Simple mode	5	-0.692313	0.515965	0.250773	0.99948	0.381988	2.61516
genus.Fusicatenibacter.id.11305	Keloid || id:ebi-a-GCST90018874	Simple mode	18	0.2271	0.435153	0.608484	1.03759	0.478601	2.24946
genus.Gordonibacter.id.821	Keloid || id:ebi-a-GCST90018874	Simple mode	12	-0.197794	0.230812	0.409755	0.789022	0.463333	1.34365
genus.Haemophilus.id.3698	Keloid || id:ebi-a-GCST90018874	Simple mode	9	-0.0341376	0.243949	0.892168	0.810547	0.540032	1.21657
genus.Holdemanella.id.11393	Keloid || id:ebi-a-GCST90018874	Simple mode	11	-0.108894	0.319339	0.740161	0.831739	0.381428	1.81368
genus.Holdemania.id.2157	Keloid || id:ebi-a-GCST90018874	Simple mode	15	0.257983	0.429547	0.55771	0.778317	0.402547	1.50486
genus.Howardella.id.2000	Keloid || id:ebi-a-GCST90018874	Simple mode	10	-0.121794	0.251942	0.640341	0.885573	0.165678	4.73353
genus.Hungatella.id.11306	Keloid || id:ebi-a-GCST90018874	Simple mode	5	0.361461	0.33184	0.337266	1.39318	0.876278	2.215
genus.Intestinibacter.id.11345	Keloid || id:ebi-a-GCST90018874	Simple mode	15	0.0400208	0.344696	0.909218	1.30538	0.936567	1.81942
genus.Intestinimonas.id.2062	Keloid || id:ebi-a-GCST90018874	Simple mode	17	-0.165204	0.284295	0.56927	1.73606	0.782217	3.85303
genus.Lachnoclostridium.id.11308	Keloid || id:ebi-a-GCST90018874	Simple mode	13	0.0712879	0.535604	0.896322	1.57571	0.755176	3.28781
genus.Lachnospira.id.2004	Keloid || id:ebi-a-GCST90018874	Simple mode	6	0.0712231	0.601923	0.910416	0.664511	0.186649	2.36581
genus.LachnospiraceaeFCS020group.id.11314	Keloid || id:ebi-a-GCST90018874	Simple mode	12	-0.0919555	0.358485	0.80229	0.866025	0.511988	1.46488
genus.LachnospiraceaeNC2004group.id.11316	Keloid || id:ebi-a-GCST90018874	Simple mode	9	-0.0421941	0.291891	0.888638	0.931259	0.620622	1.39738
genus.LachnospiraceaeND3007group.id.11317	Keloid || id:ebi-a-GCST90018874	Simple mode	3	0.193865	0.588975	0.77331	0.6957	0.316499	1.52923
genus.LachnospiraceaeNK4A136group.id.11319	Keloid || id:ebi-a-GCST90018874	Simple mode	15	-0.314856	0.33359	0.361255	0.734278	0.36414	1.48065
genus.LachnospiraceaeUCG001.id.11321	Keloid || id:ebi-a-GCST90018874	Simple mode	13	-0.154067	0.343813	0.662055	0.508407	0.0124605	20.7438
genus.LachnospiraceaeUCG004.id.11324	Keloid || id:ebi-a-GCST90018874	Simple mode	12	-0.299358	0.405233	0.475538	0.645737	0.29998	1.39002
genus.LachnospiraceaeUCG008.id.11328	Keloid || id:ebi-a-GCST90018874	Simple mode	11	-0.161627	0.284039	0.581889	0.743969	0.364303	1.51931
genus.LachnospiraceaeUCG010.id.11330	Keloid || id:ebi-a-GCST90018874	Simple mode	10	-0.367705	0.427256	0.411786	0.500417	0.182026	1.37572
genus.Lactobacillus.id.1837	Keloid || id:ebi-a-GCST90018874	Simple mode	10	0.300548	0.250953	0.261651	0.548925	0.219185	1.37472
genus.Lactococcus.id.1851	Keloid || id:ebi-a-GCST90018874	Simple mode	9	0.311703	0.16167	0.0899947	2.19646	0.641349	7.52234
genus.Marvinbryantia.id.2005	Keloid || id:ebi-a-GCST90018874	Simple mode	10	0.661807	0.526721	0.240579	1.10206	0.6917	1.75589
genus.Methanobrevibacter.id.123	Keloid || id:ebi-a-GCST90018874	Simple mode	6	0.0278936	0.254415	0.916961	1.26787	0.89444	1.7972
genus.Odoribacter.id.952	Keloid || id:ebi-a-GCST90018874	Simple mode	7	0.00980781	0.684232	0.989028	1.25496	0.534833	2.94468
genus.Olsenella.id.822	Keloid || id:ebi-a-GCST90018874	Simple mode	11	0.249253	0.305212	0.433148	1.08712	0.481348	2.45525
genus.Oscillibacter.id.2063	Keloid || id:ebi-a-GCST90018874	Simple mode	14	-0.417575	0.335552	0.235307	0.977273	0.434501	2.19807
genus.Oscillospira.id.2064	Keloid || id:ebi-a-GCST90018874	Simple mode	8	-0.420488	0.55329	0.472083	0.852916	0.638074	1.1401
genus.Oxalobacter.id.2978	Keloid || id:ebi-a-GCST90018874	Simple mode	11	0.194827	0.309675	0.543365	0.863963	0.707236	1.05542
genus.Parabacteroides.id.954	Keloid || id:ebi-a-GCST90018874	Simple mode	6	0.640097	0.602233	0.336456	0.820539	0.521949	1.28994
genus.Paraprevotella.id.962	Keloid || id:ebi-a-GCST90018874	Simple mode	13	0.368413	0.265184	0.18999	0.885104	0.607556	1.28944
genus.Parasutterella.id.2892	Keloid || id:ebi-a-GCST90018874	Simple mode	15	0.00180489	0.299539	0.995277	1.35631	0.618996	2.97188
genus.Peptococcus.id.2037	Keloid || id:ebi-a-GCST90018874	Simple mode	12	0.341657	0.277975	0.24468	1.02397	0.694188	1.51041
genus.Phascolarctobacterium.id.2168	Keloid || id:ebi-a-GCST90018874	Simple mode	9	-0.132649	0.328054	0.696549	1.0791	0.778978	1.49486
genus.Prevotella7.id.11182	Keloid || id:ebi-a-GCST90018874	Simple mode	11	0.040423	0.261794	0.88036	0.966439	0.59913	1.55893
genus.Prevotella9.id.11183	Keloid || id:ebi-a-GCST90018874	Simple mode	15	0.112048	0.36346	0.762408	1.00494	0.640849	1.57588
genus.RikenellaceaeRC9gutgroup.id.11191	Keloid || id:ebi-a-GCST90018874	Simple mode	11	-0.217828	0.292638	0.473787	2.03947	0.686502	6.05886
genus.Romboutsia.id.11347	Keloid || id:ebi-a-GCST90018874	Simple mode	13	-0.115766	0.383081	0.767675	0.859196	0.579225	1.27449
genus.Roseburia.id.2012	Keloid || id:ebi-a-GCST90018874	Simple mode	13	-0.7877	0.529273	0.162482	0.818939	0.60763	1.10373
genus.Ruminiclostridium5.id.11355	Keloid || id:ebi-a-GCST90018874	Simple mode	11	0.585578	0.419221	0.192691	0.896825	0.479602	1.67701
genus.Ruminiclostridium6.id.11356	Keloid || id:ebi-a-GCST90018874	Simple mode	15	0.476765	0.535206	0.388086	0.909127	0.503294	1.6422
genus.Ruminiclostridium9.id.11357	Keloid || id:ebi-a-GCST90018874	Simple mode	9	-0.00503802	0.461638	0.99156	0.84531	0.248706	2.87306
genus.RuminococcaceaeNK4A214group.id.11358	Keloid || id:ebi-a-GCST90018874	Simple mode	13	-0.482249	0.374307	0.221902	1.24469	0.797107	1.94358
genus.RuminococcaceaeUCG002.id.11360	Keloid || id:ebi-a-GCST90018874	Simple mode	22	-0.408153	0.311788	0.204654	1.07375	0.73887	1.56041
genus.RuminococcaceaeUCG003.id.11361	Keloid || id:ebi-a-GCST90018874	Simple mode	12	-0.2886	0.468339	0.550289	1.29432	0.557703	3.00385
genus.RuminococcaceaeUCG004.id.11362	Keloid || id:ebi-a-GCST90018874	Simple mode	11	0.332165	0.326495	0.332961	1.51546	0.768585	2.98809
genus.RuminococcaceaeUCG005.id.11363	Keloid || id:ebi-a-GCST90018874	Simple mode	14	-0.0395242	0.398931	0.92259	2.04095	0.911809	4.56839
genus.RuminococcaceaeUCG009.id.11366	Keloid || id:ebi-a-GCST90018874	Simple mode	12	0.0810202	0.284392	0.781021	1.01883	0.757234	1.3708
genus.RuminococcaceaeUCG010.id.11367	Keloid || id:ebi-a-GCST90018874	Simple mode	6	0.0227555	0.434644	0.960274	1.09116	0.864768	1.37681
genus.RuminococcaceaeUCG011.id.11368	Keloid || id:ebi-a-GCST90018874	Simple mode	8	-0.0696091	0.264706	0.800148	0.885331	0.540317	1.45065
genus.RuminococcaceaeUCG013.id.11370	Keloid || id:ebi-a-GCST90018874	Simple mode	12	-0.00694641	0.460916	0.988246	0.966799	0.624927	1.4957
genus.RuminococcaceaeUCG014.id.11371	Keloid || id:ebi-a-GCST90018874	Simple mode	11	-0.329453	0.406104	0.436104	0.300303	0.0321989	2.80077
genus.Ruminococcus1.id.11373	Keloid || id:ebi-a-GCST90018874	Simple mode	10	-0.302762	0.46227	0.528885	1.08302	0.685749	1.71045
genus.Ruminococcus2.id.11374	Keloid || id:ebi-a-GCST90018874	Simple mode	15	-0.409776	0.32955	0.234125	1.04081	0.727037	1.49001
genus.Sellimonas.id.14369	Keloid || id:ebi-a-GCST90018874	Simple mode	9	-0.0814072	0.204298	0.700705	1.43542	0.749053	2.75073
genus.Senegalimassilia.id.11160	Keloid || id:ebi-a-GCST90018874	Simple mode	5	0.0214419	0.295087	0.945563	1.40498	0.716803	2.75386
genus.Slackia.id.825	Keloid || id:ebi-a-GCST90018874	Simple mode	6	0.0482859	0.339253	0.892377	1.26373	0.404082	3.95221
genus.Streptococcus.id.1853	Keloid || id:ebi-a-GCST90018874	Simple mode	15	0.00188883	0.483026	0.996935	0.990323	0.668374	1.46735
genus.Subdoligranulum.id.2070	Keloid || id:ebi-a-GCST90018874	Simple mode	11	0.432781	0.437946	0.346359	0.899171	0.660773	1.22358
genus.Sutterella.id.2896	Keloid || id:ebi-a-GCST90018874	Simple mode	12	-0.163313	0.442522	0.719096	1.04083	0.529627	2.04546
genus.Terrisporobacter.id.11348	Keloid || id:ebi-a-GCST90018874	Simple mode	5	0.398127	0.364472	0.336064	1.01033	0.564905	1.80697
genus.Turicibacter.id.2162	Keloid || id:ebi-a-GCST90018874	Simple mode	10	0.413492	0.40988	0.339417	0.868168	0.447884	1.68284
genus.Tyzzerella3.id.11335	Keloid || id:ebi-a-GCST90018874	Simple mode	13	0.203195	0.207456	0.346686	1.03082	0.704726	1.50782
genus.Veillonella.id.2198	Keloid || id:ebi-a-GCST90018874	Simple mode	8	-0.49783	0.420536	0.275129	0.850739	0.656332	1.10273
genus.Victivallis.id.2256	Keloid || id:ebi-a-GCST90018874	Simple mode	10	0.269161	0.222447	0.2571	0.847721	0.485575	1.47996
order.Actinomycetales.id.420	Keloid || id:ebi-a-GCST90018874	Simple mode	5	0.304415	0.412893	0.501865	0.973773	0.65302	1.45207
order.Bacillales.id.1674	Keloid || id:ebi-a-GCST90018874	Simple mode	9	0.364331	0.228131	0.148926	0.796966	0.102959	6.169
order.Bacteroidales.id.913	Keloid || id:ebi-a-GCST90018874	Simple mode	14	0.0636701	0.331746	0.850767	0.903693	0.493455	1.65499
order.Bifidobacteriales.id.432	Keloid || id:ebi-a-GCST90018874	Simple mode	12	0.323598	0.373288	0.404518	0.820524	0.492248	1.36773
order.Burkholderiales.id.2874	Keloid || id:ebi-a-GCST90018874	Simple mode	11	0.0769179	0.513132	0.883825	1.07389	0.375876	3.06814
order.Clostridiales.id.1863	Keloid || id:ebi-a-GCST90018874	Simple mode	13	0.226846	0.459261	0.630268	1.25361	0.412491	3.80987
order.Coriobacteriales.id.810	Keloid || id:ebi-a-GCST90018874	Simple mode	14	-0.0390441	0.508181	0.939928	0.530306	0.013912	20.2145
order.Desulfovibrionales.id.3156	Keloid || id:ebi-a-GCST90018874	Simple mode	12	0.170328	0.518157	0.748541	0.99414	0.450286	2.19486
order.Enterobacteriales.id.3468	Keloid || id:ebi-a-GCST90018874	Simple mode	7	0.172689	0.423056	0.697298	1.15963	0.634066	2.12084
order.Erysipelotrichales.id.2148	Keloid || id:ebi-a-GCST90018874	Simple mode	13	-0.144262	0.516477	0.784755	1.07382	0.330039	3.49381
order.Gastranaerophilales.id.1591	Keloid || id:ebi-a-GCST90018874	Simple mode	9	-0.101344	0.342087	0.774583	1.01957	0.321736	3.23099
order.Lactobacillales.id.1800	Keloid || id:ebi-a-GCST90018874	Simple mode	15	0.0293162	0.362447	0.936679	1.09719	0.575724	2.09099
order.Methanobacteriales.id.120	Keloid || id:ebi-a-GCST90018874	Simple mode	10	0.0249228	0.251237	0.923153	0.946755	0.616605	1.45368
order.MollicutesRF9.id.11579	Keloid || id:ebi-a-GCST90018874	Simple mode	13	0.152594	0.416434	0.720424	0.848998	0.627107	1.1494
order.NB1n.id.3953	Keloid || id:ebi-a-GCST90018874	Simple mode	13	0.367954	0.335405	0.294148	0.912146	0.451768	1.84167
order.Pasteurellales.id.3688	Keloid || id:ebi-a-GCST90018874	Simple mode	14	0.129792	0.279215	0.649732	1.0029	0.63344	1.58785
order.Rhodospirillales.id.2667	Keloid || id:ebi-a-GCST90018874	Simple mode	14	-0.256539	0.303925	0.413885	0.574985	0.181315	1.82338
order.Selenomonadales.id.2165	Keloid || id:ebi-a-GCST90018874	Simple mode	12	0.639826	0.442204	0.175814	1.01491	0.674063	1.52809
order.Verrucomicrobiales.id.4030	Keloid || id:ebi-a-GCST90018874	Simple mode	11	-0.0232307	0.372656	0.951522	1.07206	0.804776	1.42812
order.Victivallales.id.2254	Keloid || id:ebi-a-GCST90018874	Simple mode	8	-0.0488638	0.287141	0.869687	0.958684	0.54102	1.69878
phylum.Actinobacteria.id.400	Keloid || id:ebi-a-GCST90018874	Simple mode	15	0.26573	0.473645	0.583644	0.991382	0.614803	1.59862
phylum.Bacteroidetes.id.905	Keloid || id:ebi-a-GCST90018874	Simple mode	12	0.114747	0.374486	0.765012	8.5	7.58e-06	9.52684e+06
phylum.Cyanobacteria.id.1500	Keloid || id:ebi-a-GCST90018874	Simple mode	8	0.275335	0.351772	0.459453	1.05583	0.41047	2.71588
phylum.Euryarchaeota.id.55	Keloid || id:ebi-a-GCST90018874	Simple mode	12	0.0681351	0.216747	0.759134	0.977795	0.441149	2.16726
phylum.Firmicutes.id.1672	Keloid || id:ebi-a-GCST90018874	Simple mode	16	0.237517	0.408526	0.569605	1.21393	0.382691	3.85071
phylum.Lentisphaerae.id.2238	Keloid || id:ebi-a-GCST90018874	Simple mode	9	0.125174	0.293358	0.680853	1.22739	0.385829	3.90455
phylum.Proteobacteria.id.2375	Keloid || id:ebi-a-GCST90018874	Simple mode	12	-0.294867	0.515828	0.579061	0.723302	0.372101	1.40598
phylum.Tenericutes.id.3919	Keloid || id:ebi-a-GCST90018874	Simple mode	12	-0.119808	0.474307	0.805238	0.797495	0.521106	1.22048
phylum.Verrucomicrobia.id.3982	Keloid || id:ebi-a-GCST90018874	Simple mode	12	-0.14988	0.328828	0.6574	0.819512	0.598351	1.12242

## Sheet: Weighted Mode
id.exposure	outcome	method	nsnp	b	se	p	OR	OR_lci95	OR_uci95
class.Actinobacteria.id.419	Keloid || id:ebi-a-GCST90018874	Weighted mode	15	0.0758942	0.311079	0.810792	0.909089	0.595221	1.38847
class.Alphaproteobacteria.id.2379	Keloid || id:ebi-a-GCST90018874	Weighted mode	7	-0.00213833	0.446633	0.996335	1.23083	0.30209	5.0149
class.Bacilli.id.1673	Keloid || id:ebi-a-GCST90018874	Weighted mode	18	-0.0322067	0.284026	0.911047	1.00919	0.618963	1.64544
class.Bacteroidia.id.912	Keloid || id:ebi-a-GCST90018874	Weighted mode	14	0.0339603	0.264242	0.899705	0.9348	0.627363	1.3929
class.Betaproteobacteria.id.2867	Keloid || id:ebi-a-GCST90018874	Weighted mode	12	0.201401	0.576097	0.733243	1.02167	0.572966	1.82178
class.Clostridia.id.1859	Keloid || id:ebi-a-GCST90018874	Weighted mode	12	0.0496742	0.481191	0.919637	1.02279	0.556332	1.88034
class.Coriobacteriia.id.809	Keloid || id:ebi-a-GCST90018874	Weighted mode	14	0.0585664	0.485946	0.905914	1.29616	0.258901	6.48908
class.Deltaproteobacteria.id.3087	Keloid || id:ebi-a-GCST90018874	Weighted mode	13	0.334057	0.371109	0.385744	0.961905	0.643475	1.43791
class.Erysipelotrichia.id.2147	Keloid || id:ebi-a-GCST90018874	Weighted mode	13	-0.082333	0.494616	0.870568	0.931599	0.680224	1.27587
class.Gammaproteobacteria.id.3303	Keloid || id:ebi-a-GCST90018874	Weighted mode	6	-0.596163	0.58541	0.355222	1.04947	0.53975	2.04055
class.Lentisphaeria.id.2250	Keloid || id:ebi-a-GCST90018874	Weighted mode	8	-0.147264	0.229478	0.541481	1.06851	0.596128	1.91522
class.Melainabacteria.id.1589	Keloid || id:ebi-a-GCST90018874	Weighted mode	10	-0.465022	0.303991	0.16044	2.40574	0.52869	10.9471
class.Methanobacteria.id.119	Keloid || id:ebi-a-GCST90018874	Weighted mode	10	0.0459617	0.217784	0.837555	1.46779	0.87706	2.4564
class.Mollicutes.id.3920	Keloid || id:ebi-a-GCST90018874	Weighted mode	12	-0.385108	0.394952	0.350478	1.0678	0.720339	1.58287
class.Negativicutes.id.2164	Keloid || id:ebi-a-GCST90018874	Weighted mode	12	0.606725	0.435367	0.190956	1.00189	0.388741	2.58214
class.Verrucomicrobiae.id.4029	Keloid || id:ebi-a-GCST90018874	Weighted mode	11	-0.00937079	0.364389	0.979989	1.53097	0.857109	2.73463
family.Acidaminococcaceae.id.2166	Keloid || id:ebi-a-GCST90018874	Weighted mode	7	-0.0622831	0.340096	0.860725	1.51464	0.557278	4.11665
family.Actinomycetaceae.id.421	Keloid || id:ebi-a-GCST90018874	Weighted mode	5	0.323962	0.409797	0.473441	1.22006	0.701344	2.12241
family.Alcaligenaceae.id.2875	Keloid || id:ebi-a-GCST90018874	Weighted mode	12	0.074715	0.488654	0.881246	1.17827	0.783464	1.77204
family.Bacteroidaceae.id.917	Keloid || id:ebi-a-GCST90018874	Weighted mode	9	0.25915	0.634947	0.693873	1.54154	0.653382	3.63699
family.BacteroidalesS24.7group.id.11173	Keloid || id:ebi-a-GCST90018874	Weighted mode	8	-0.062141	0.244094	0.806366	1.44871	0.672429	3.12115
family.Bifidobacteriaceae.id.433	Keloid || id:ebi-a-GCST90018874	Weighted mode	12	0.287991	0.306594	0.367734	0.254803	0.0204766	3.17068
family.Christensenellaceae.id.1866	Keloid || id:ebi-a-GCST90018874	Weighted mode	11	0.172026	0.197338	0.4038	0.909447	0.532731	1.55255
family.Clostridiaceae1.id.1869	Keloid || id:ebi-a-GCST90018874	Weighted mode	10	-0.195928	0.451052	0.674241	1.0825	0.691297	1.69507
family.ClostridialesvadinBB60group.id.11286	Keloid || id:ebi-a-GCST90018874	Weighted mode	15	0.204765	0.276715	0.471536	0.849326	0.356773	2.02189
family.Coriobacteriaceae.id.811	Keloid || id:ebi-a-GCST90018874	Weighted mode	14	0.0585664	0.472565	0.903264	0.933281	0.430143	2.02494
family.Defluviitaleaceae.id.1924	Keloid || id:ebi-a-GCST90018874	Weighted mode	11	0.03854	0.311628	0.904025	0.639645	0.25801	1.58577
family.Desulfovibrionaceae.id.3169	Keloid || id:ebi-a-GCST90018874	Weighted mode	10	0.353699	0.369705	0.363707	0.865548	0.544844	1.37502
family.Enterobacteriaceae.id.3469	Keloid || id:ebi-a-GCST90018874	Weighted mode	7	0.128144	0.412667	0.766665	1.04948	0.724966	1.51925
family.Erysipelotrichaceae.id.2149	Keloid || id:ebi-a-GCST90018874	Weighted mode	13	-0.082333	0.49409	0.870432	1.48903	0.728885	3.04193
family.FamilyXI.id.1936	Keloid || id:ebi-a-GCST90018874	Weighted mode	8	0.136169	0.21216	0.541429	0.83747	0.504853	1.38923
family.FamilyXIII.id.1957	Keloid || id:ebi-a-GCST90018874	Weighted mode	10	0.0612569	0.59954	0.920859	12.224	2.60275	57.4107
family.Lachnospiraceae.id.1987	Keloid || id:ebi-a-GCST90018874	Weighted mode	17	0.167034	0.383952	0.669346	1.33506	0.798076	2.23336
family.Lactobacillaceae.id.1836	Keloid || id:ebi-a-GCST90018874	Weighted mode	9	0.330173	0.21942	0.170802	1.36903	0.920697	2.03567
family.Methanobacteriaceae.id.121	Keloid || id:ebi-a-GCST90018874	Weighted mode	10	0.0459617	0.215173	0.835617	1.51209	0.677142	3.37656
family.Oxalobacteraceae.id.2966	Keloid || id:ebi-a-GCST90018874	Weighted mode	14	-0.0838871	0.33463	0.805975	1.47932	0.713644	3.06651
family.Pasteurellaceae.id.3689	Keloid || id:ebi-a-GCST90018874	Weighted mode	14	0.101741	0.224178	0.657427	2.15288	0.639616	7.24634
family.Peptococcaceae.id.2024	Keloid || id:ebi-a-GCST90018874	Weighted mode	9	0.02531	0.376571	0.948062	1.21675	0.917824	1.61302
family.Peptostreptococcaceae.id.2042	Keloid || id:ebi-a-GCST90018874	Weighted mode	14	0.176592	0.356975	0.629074	1.18228	0.959134	1.45735
family.Porphyromonadaceae.id.943	Keloid || id:ebi-a-GCST90018874	Weighted mode	9	0.146359	0.581574	0.807648	1.22531	0.815937	1.84008
family.Prevotellaceae.id.960	Keloid || id:ebi-a-GCST90018874	Weighted mode	16	-0.700123	0.366559	0.0754467	1.19632	0.830724	1.72282
family.Rhodospirillaceae.id.2717	Keloid || id:ebi-a-GCST90018874	Weighted mode	15	-0.461479	0.300836	0.147316	26.3326	0.834292	831.13
family.Rikenellaceae.id.967	Keloid || id:ebi-a-GCST90018874	Weighted mode	19	0.253843	0.279189	0.375251	0.694542	0.392841	1.22795
family.Ruminococcaceae.id.2050	Keloid || id:ebi-a-GCST90018874	Weighted mode	10	-0.0511625	0.280535	0.859331	0.784189	0.505749	1.21592
family.Streptococcaceae.id.1850	Keloid || id:ebi-a-GCST90018874	Weighted mode	14	0.529383	0.284425	0.0854715	0.607848	0.26658	1.386
family.Veillonellaceae.id.2172	Keloid || id:ebi-a-GCST90018874	Weighted mode	19	-0.05492	0.221337	0.806844	0.62791	0.319919	1.23241
family.Verrucomicrobiaceae.id.4036	Keloid || id:ebi-a-GCST90018874	Weighted mode	11	-0.00932002	0.384195	0.981124	1.41272	0.34017	5.86697
family.Victivallaceae.id.2255	Keloid || id:ebi-a-GCST90018874	Weighted mode	12	0.0475582	0.177979	0.794249	1.14246	0.86878	1.50235
genus.Clostridiuminnocuumgroup.id.14397	Keloid || id:ebi-a-GCST90018874	Weighted mode	9	-0.447556	0.309732	0.186468	1.08235	0.889732	1.31666
genus.Eubacteriumbrachygroup.id.11296	Keloid || id:ebi-a-GCST90018874	Weighted mode	10	0.0153926	0.239715	0.950205	1.30887	0.846338	2.02417
genus.Eubacteriumcoprostanoligenesgroup.id.11375	Keloid || id:ebi-a-GCST90018874	Weighted mode	13	-0.278158	0.387261	0.486341	1.30455	0.853472	1.99403
genus.Eubacteriumeligensgroup.id.14372	Keloid || id:ebi-a-GCST90018874	Weighted mode	7	0.0942882	0.445786	0.839491	0.382712	0.108312	1.35228
genus.Eubacteriumfissicatenagroup.id.14373	Keloid || id:ebi-a-GCST90018874	Weighted mode	9	0.205832	0.229364	0.395707	1.24876	0.68149	2.28823
genus.Eubacteriumhalliigroup.id.11338	Keloid || id:ebi-a-GCST90018874	Weighted mode	16	-0.038941	0.244321	0.875492	1.01538	0.617229	1.67035
genus.Eubacteriumnodatumgroup.id.11297	Keloid || id:ebi-a-GCST90018874	Weighted mode	11	0.0781366	0.190211	0.689892	1.35583	0.603593	3.04556
genus.Eubacteriumoxidoreducensgroup.id.11339	Keloid || id:ebi-a-GCST90018874	Weighted mode	5	0.135205	0.256486	0.625976	1.38732	0.592967	3.24581
genus.Eubacteriumrectalegroup.id.14374	Keloid || id:ebi-a-GCST90018874	Weighted mode	8	-0.593193	0.514608	0.28687	1.05314	0.32394	3.42378
genus.Eubacteriumruminantiumgroup.id.11340	Keloid || id:ebi-a-GCST90018874	Weighted mode	18	0.280761	0.257509	0.290797	1.14421	0.839511	1.5595
genus.Eubacteriumventriosumgroup.id.11341	Keloid || id:ebi-a-GCST90018874	Weighted mode	15	-0.246251	0.358182	0.502998	1.12337	0.853113	1.47923
genus.Eubacteriumxylanophilumgroup.id.14375	Keloid || id:ebi-a-GCST90018874	Weighted mode	9	-0.314896	0.456326	0.509671	1.43955	0.920531	2.25121
genus.Ruminococcusgauvreauiigroup.id.11342	Keloid || id:ebi-a-GCST90018874	Weighted mode	12	0.0688536	0.373293	0.857018	1.25656	0.80399	1.96388
genus.Ruminococcusgnavusgroup.id.14376	Keloid || id:ebi-a-GCST90018874	Weighted mode	12	0.257197	0.271895	0.364493	1.18033	0.606179	2.29831
genus.Ruminococcustorquesgroup.id.14377	Keloid || id:ebi-a-GCST90018874	Weighted mode	9	-0.0369999	0.242485	0.882503	1.00253	0.64857	1.54966
genus.Actinomyces.id.423	Keloid || id:ebi-a-GCST90018874	Weighted mode	7	0.146013	0.261281	0.5965	1.15011	0.845254	1.56493
genus.Adlercreutzia.id.812	Keloid || id:ebi-a-GCST90018874	Weighted mode	8	0.339856	0.301693	0.297088	1.06574	0.556242	2.04192
genus.Akkermansia.id.4037	Keloid || id:ebi-a-GCST90018874	Weighted mode	11	-0.0101599	0.355847	0.977784	1.03454	0.625674	1.7106
genus.Alistipes.id.968	Keloid || id:ebi-a-GCST90018874	Weighted mode	14	0.506321	0.452659	0.283576	1.61684	0.464026	5.6337
genus.Allisonella.id.2174	Keloid || id:ebi-a-GCST90018874	Weighted mode	8	-0.0577846	0.190542	0.770503	1.25871	0.755595	2.09683
genus.Alloprevotella.id.961	Keloid || id:ebi-a-GCST90018874	Weighted mode	6	0.298324	0.236783	0.263308	1.00669	0.690296	1.46809
genus.Anaerofilum.id.2053	Keloid || id:ebi-a-GCST90018874	Weighted mode	11	0.0703555	0.208464	0.742721	1.38209	0.664948	2.87267
genus.Anaerostipes.id.1991	Keloid || id:ebi-a-GCST90018874	Weighted mode	13	-0.438892	0.428861	0.326312	1.33374	0.75367	2.36028
genus.Anaerotruncus.id.2054	Keloid || id:ebi-a-GCST90018874	Weighted mode	13	-0.686104	0.440636	0.145421	1.88971	0.310206	11.5117
genus.Bacteroides.id.918	Keloid || id:ebi-a-GCST90018874	Weighted mode	9	0.25915	0.609171	0.681747	1.1903	0.643719	2.20097
genus.Barnesiella.id.944	Keloid || id:ebi-a-GCST90018874	Weighted mode	14	-0.04817	0.364987	0.897023	1.49012	0.914415	2.4283
genus.Bifidobacterium.id.436	Keloid || id:ebi-a-GCST90018874	Weighted mode	12	0.229267	0.305532	0.46877	1.07995	0.395019	2.95251
genus.Bilophila.id.3170	Keloid || id:ebi-a-GCST90018874	Weighted mode	13	0.117825	0.362968	0.751062	1.10665	0.465604	2.63028
genus.Blautia.id.1992	Keloid || id:ebi-a-GCST90018874	Weighted mode	13	0.461773	0.396987	0.26736	2.21025	0.328953	14.8508
genus.Butyricicoccus.id.2055	Keloid || id:ebi-a-GCST90018874	Weighted mode	8	0.178804	0.276469	0.53842	1.24301	0.70651	2.1869
genus.Butyricimonas.id.945	Keloid || id:ebi-a-GCST90018874	Weighted mode	13	0.29279	0.386101	0.462891	1.20534	0.807228	1.79979
genus.Butyrivibrio.id.1993	Keloid || id:ebi-a-GCST90018874	Weighted mode	15	0.103123	0.182239	0.58044	1.25464	0.51002	3.08638
genus.CandidatusSoleaferrea.id.11350	Keloid || id:ebi-a-GCST90018874	Weighted mode	10	0.0183481	0.265208	0.946356	1.24286	0.573385	2.69402
genus.Catenibacterium.id.2153	Keloid || id:ebi-a-GCST90018874	Weighted mode	5	0.0285525	0.311949	0.931473	2.01456	0.402546	10.082
genus.ChristensenellaceaeR.7group.id.11283	Keloid || id:ebi-a-GCST90018874	Weighted mode	10	-0.335532	0.356764	0.371524	0.989308	0.566424	1.72791
genus.Clostridiumsensustricto1.id.1873	Keloid || id:ebi-a-GCST90018874	Weighted mode	7	-0.180474	0.280323	0.543509	0.811878	0.539807	1.22108
genus.Collinsella.id.815	Keloid || id:ebi-a-GCST90018874	Weighted mode	9	0.682825	0.578677	0.271905	0.961708	0.355199	2.60385
genus.Coprobacter.id.949	Keloid || id:ebi-a-GCST90018874	Weighted mode	11	-0.0221378	0.356664	0.951731	1.06032	0.415971	2.70276
genus.Coprococcus1.id.11301	Keloid || id:ebi-a-GCST90018874	Weighted mode	11	-0.915283	0.727871	0.237153	1.25404	0.449714	3.49693
genus.Coprococcus2.id.11302	Keloid || id:ebi-a-GCST90018874	Weighted mode	8	-0.443364	0.388781	0.291632	1.04517	0.630333	1.73302
genus.Coprococcus3.id.11303	Keloid || id:ebi-a-GCST90018874	Weighted mode	9	-0.509234	0.500715	0.338914	0.86182	0.588181	1.26276
genus.DefluviitaleaceaeUCG011.id.11287	Keloid || id:ebi-a-GCST90018874	Weighted mode	9	0.0307094	0.295176	0.9197	1.18569	0.429446	3.27368
genus.Desulfovibrio.id.3173	Keloid || id:ebi-a-GCST90018874	Weighted mode	10	0.000381462	0.297563	0.999005	1.38166	0.650314	2.93546
genus.Dialister.id.2183	Keloid || id:ebi-a-GCST90018874	Weighted mode	11	-0.130571	0.463263	0.783804	1.04042	0.0483785	22.375
genus.Dorea.id.1997	Keloid || id:ebi-a-GCST90018874	Weighted mode	10	0.258126	0.407998	0.542691	1.16125	0.6326	2.13168
genus.Eggerthella.id.819	Keloid || id:ebi-a-GCST90018874	Weighted mode	11	-0.173159	0.290802	0.564772	1.19932	0.73952	1.94502
genus.Eisenbergiella.id.11304	Keloid || id:ebi-a-GCST90018874	Weighted mode	11	-0.0598265	0.240718	0.808751	1.1885	0.518664	2.72339
genus.Enterorhabdus.id.820	Keloid || id:ebi-a-GCST90018874	Weighted mode	6	-0.00976757	0.211595	0.964968	1.13672	0.504098	2.56324
genus.Erysipelatoclostridium.id.11381	Keloid || id:ebi-a-GCST90018874	Weighted mode	15	0.130387	0.234822	0.58748	2.12487	0.257241	17.5518
genus.ErysipelotrichaceaeUCG003.id.11384	Keloid || id:ebi-a-GCST90018874	Weighted mode	16	0.267531	0.380584	0.492853	1.11079	0.624473	1.97584
genus.Escherichia.Shigella.id.3504	Keloid || id:ebi-a-GCST90018874	Weighted mode	10	-0.000519979	0.490738	0.999178	1.16489	0.755244	1.79674
genus.Faecalibacterium.id.2057	Keloid || id:ebi-a-GCST90018874	Weighted mode	10	-0.250622	0.336388	0.475255	0.865661	0.314567	2.38222
genus.FamilyXIIIAD3011group.id.11293	Keloid || id:ebi-a-GCST90018874	Weighted mode	13	0.454709	0.375262	0.248943	0.920965	0.3634	2.33401
genus.FamilyXIIIUCG001.id.11294	Keloid || id:ebi-a-GCST90018874	Weighted mode	8	-0.308867	0.357831	0.416638	0.968046	0.309686	3.02601
genus.Flavonifractor.id.2059	Keloid || id:ebi-a-GCST90018874	Weighted mode	5	-0.599793	0.46839	0.269565	0.781651	0.5269	1.15957
genus.Fusicatenibacter.id.11305	Keloid || id:ebi-a-GCST90018874	Weighted mode	18	0.0835314	0.415661	0.843114	0.817902	0.590264	1.13333
genus.Gordonibacter.id.821	Keloid || id:ebi-a-GCST90018874	Weighted mode	12	-0.12205	0.19197	0.537923	0.903622	0.462165	1.76676
genus.Haemophilus.id.3698	Keloid || id:ebi-a-GCST90018874	Weighted mode	9	0.00492498	0.229534	0.983407	0.77646	0.434759	1.38672
genus.Holdemanella.id.11393	Keloid || id:ebi-a-GCST90018874	Weighted mode	11	-0.0952704	0.301689	0.758654	1.05269	0.404558	2.7392
genus.Holdemania.id.2157	Keloid || id:ebi-a-GCST90018874	Weighted mode	15	0.415716	0.346388	0.249998	0.939486	0.587208	1.5031
genus.Howardella.id.2000	Keloid || id:ebi-a-GCST90018874	Weighted mode	10	-0.0337645	0.222631	0.882799	0.956037	0.670376	1.36342
genus.Hungatella.id.11306	Keloid || id:ebi-a-GCST90018874	Weighted mode	5	0.340025	0.343357	0.378087	1.02975	0.50607	2.09533
genus.Intestinibacter.id.11345	Keloid || id:ebi-a-GCST90018874	Weighted mode	15	0.0102775	0.29662	0.972849	0.953322	0.497923	1.82523
genus.Intestinimonas.id.2062	Keloid || id:ebi-a-GCST90018874	Weighted mode	17	-0.0265774	0.203862	0.897899	0.946798	0.374064	2.39645
genus.Lachnoclostridium.id.11308	Keloid || id:ebi-a-GCST90018874	Weighted mode	13	0.226027	0.567127	0.697227	1.0315	0.753483	1.41211
genus.Lachnospira.id.2004	Keloid || id:ebi-a-GCST90018874	Weighted mode	6	0.0193823	0.588472	0.975	1.01173	0.798765	1.28148
genus.LachnospiraceaeFCS020group.id.11314	Keloid || id:ebi-a-GCST90018874	Weighted mode	12	0.00289481	0.234431	0.990369	1.02524	0.626566	1.67757
genus.LachnospiraceaeNC2004group.id.11316	Keloid || id:ebi-a-GCST90018874	Weighted mode	9	-0.00865551	0.243775	0.972546	1.04703	0.679541	1.61327
genus.LachnospiraceaeND3007group.id.11317	Keloid || id:ebi-a-GCST90018874	Weighted mode	3	0.204891	0.590434	0.761691	1.65099	0.459665	5.92988
genus.LachnospiraceaeNK4A136group.id.11319	Keloid || id:ebi-a-GCST90018874	Weighted mode	15	-0.229687	0.271591	0.411936	1.05367	0.648695	1.71146
genus.LachnospiraceaeUCG001.id.11321	Keloid || id:ebi-a-GCST90018874	Weighted mode	13	-0.125533	0.304717	0.687629	1.13291	0.80308	1.59821
genus.LachnospiraceaeUCG004.id.11324	Keloid || id:ebi-a-GCST90018874	Weighted mode	12	-0.279237	0.361203	0.45577	1.16485	0.514985	2.63479
genus.LachnospiraceaeUCG008.id.11328	Keloid || id:ebi-a-GCST90018874	Weighted mode	11	-0.179696	0.268887	0.519071	1.19974	0.536623	2.68228
genus.LachnospiraceaeUCG010.id.11330	Keloid || id:ebi-a-GCST90018874	Weighted mode	10	-0.403602	0.365274	0.297852	0.640378	0.268865	1.52524
genus.Lactobacillus.id.1837	Keloid || id:ebi-a-GCST90018874	Weighted mode	10	0.289164	0.223625	0.228189	0.940373	0.690854	1.28001
genus.Lactococcus.id.1851	Keloid || id:ebi-a-GCST90018874	Weighted mode	9	0.216867	0.161273	0.215594	0.969778	0.75786	1.24095
genus.Marvinbryantia.id.2005	Keloid || id:ebi-a-GCST90018874	Weighted mode	10	0.617792	0.490173	0.239237	1.44478	0.748683	2.78807
genus.Methanobrevibacter.id.123	Keloid || id:ebi-a-GCST90018874	Weighted mode	6	-0.21411	0.228372	0.391518	0.709927	0.369707	1.36323
genus.Odoribacter.id.952	Keloid || id:ebi-a-GCST90018874	Weighted mode	7	0.173428	0.487298	0.734097	1.40553	0.682928	2.8927
genus.Olsenella.id.822	Keloid || id:ebi-a-GCST90018874	Weighted mode	11	-0.412183	0.282876	0.175758	1.08452	0.740397	1.58859
genus.Oscillibacter.id.2063	Keloid || id:ebi-a-GCST90018874	Weighted mode	14	-0.286204	0.287714	0.338013	1.1179	0.815092	1.5332
genus.Oscillospira.id.2064	Keloid || id:ebi-a-GCST90018874	Weighted mode	8	-0.560436	0.453225	0.256129	1.13859	0.658711	1.96807
genus.Oxalobacter.id.2978	Keloid || id:ebi-a-GCST90018874	Weighted mode	11	0.165253	0.289029	0.580113	1.1071	0.717177	1.70901
genus.Parabacteroides.id.954	Keloid || id:ebi-a-GCST90018874	Weighted mode	6	-0.131746	0.544892	0.81855	1.47677	0.251966	8.65531
genus.Paraprevotella.id.962	Keloid || id:ebi-a-GCST90018874	Weighted mode	13	0.272177	0.229085	0.257776	0.757512	0.519801	1.10393
genus.Parasutterella.id.2892	Keloid || id:ebi-a-GCST90018874	Weighted mode	15	-0.00480855	0.271609	0.986125	0.76842	0.554837	1.06422
genus.Peptococcus.id.2037	Keloid || id:ebi-a-GCST90018874	Weighted mode	12	0.327113	0.216807	0.15953	0.773725	0.426462	1.40376
genus.Phascolarctobacterium.id.2168	Keloid || id:ebi-a-GCST90018874	Weighted mode	9	-0.111371	0.335487	0.748444	0.714828	0.410946	1.24342
genus.Prevotella7.id.11182	Keloid || id:ebi-a-GCST90018874	Weighted mode	11	0.0285579	0.231788	0.904384	0.62365	0.10732	3.62409
genus.Prevotella9.id.11183	Keloid || id:ebi-a-GCST90018874	Weighted mode	15	0.112048	0.379446	0.772105	1.7775	1.02287	3.08887
genus.RikenellaceaeRC9gutgroup.id.11191	Keloid || id:ebi-a-GCST90018874	Weighted mode	11	-0.109451	0.242424	0.661272	1.63566	1.0666	2.50833
genus.Romboutsia.id.11347	Keloid || id:ebi-a-GCST90018874	Weighted mode	13	0.074643	0.376591	0.846201	1.89615	0.797006	4.51112
genus.Roseburia.id.2012	Keloid || id:ebi-a-GCST90018874	Weighted mode	13	0.371868	0.430275	0.404391	1.83441	0.760725	4.42351
genus.Ruminiclostridium5.id.11355	Keloid || id:ebi-a-GCST90018874	Weighted mode	11	0.533918	0.445001	0.257865	0.40187	0.0763194	2.1161
genus.Ruminiclostridium6.id.11356	Keloid || id:ebi-a-GCST90018874	Weighted mode	15	0.476765	0.365466	0.213088	0.934497	0.570019	1.53203
genus.Ruminiclostridium9.id.11357	Keloid || id:ebi-a-GCST90018874	Weighted mode	9	0.145904	0.376839	0.70872	0.845802	0.585815	1.22117
genus.RuminococcaceaeNK4A214group.id.11358	Keloid || id:ebi-a-GCST90018874	Weighted mode	13	-0.472851	0.349968	0.201579	0.977037	0.470652	2.02826
genus.RuminococcaceaeUCG002.id.11360	Keloid || id:ebi-a-GCST90018874	Weighted mode	22	-0.129018	0.234386	0.587819	0.990673	0.529609	1.85313
genus.RuminococcaceaeUCG003.id.11361	Keloid || id:ebi-a-GCST90018874	Weighted mode	12	-0.00122325	0.345638	0.99724	0.449893	0.153835	1.31572
genus.RuminococcaceaeUCG004.id.11362	Keloid || id:ebi-a-GCST90018874	Weighted mode	11	0.337213	0.321146	0.318418	0.952076	0.652569	1.38905
genus.RuminococcaceaeUCG005.id.11363	Keloid || id:ebi-a-GCST90018874	Weighted mode	14	-0.0100196	0.347857	0.977459	1.03322	0.740561	1.44155
genus.RuminococcaceaeUCG009.id.11366	Keloid || id:ebi-a-GCST90018874	Weighted mode	12	0.0994972	0.274867	0.724223	0.952311	0.54245	1.67185
genus.RuminococcaceaeUCG010.id.11367	Keloid || id:ebi-a-GCST90018874	Weighted mode	6	0.0186711	0.436725	0.967554	0.863066	0.546416	1.36322
genus.RuminococcaceaeUCG011.id.11368	Keloid || id:ebi-a-GCST90018874	Weighted mode	8	0.0259545	0.251316	0.920642	1.00168	0.118409	8.47369
genus.RuminococcaceaeUCG013.id.11370	Keloid || id:ebi-a-GCST90018874	Weighted mode	12	-0.0330457	0.446409	0.942319	1.10906	0.615746	1.99759
genus.RuminococcaceaeUCG014.id.11371	Keloid || id:ebi-a-GCST90018874	Weighted mode	11	-0.254002	0.324281	0.451616	0.97058	0.633776	1.48637
genus.Ruminococcus1.id.11373	Keloid || id:ebi-a-GCST90018874	Weighted mode	10	-0.346777	0.396464	0.404487	1.30438	0.515502	3.3005
genus.Ruminococcus2.id.11374	Keloid || id:ebi-a-GCST90018874	Weighted mode	15	-0.206527	0.239822	0.403655	1.28658	0.581454	2.84681
genus.Sellimonas.id.14369	Keloid || id:ebi-a-GCST90018874	Weighted mode	9	-0.0953118	0.216077	0.670818	0.968431	0.479308	1.95669
genus.Senegalimassilia.id.11160	Keloid || id:ebi-a-GCST90018874	Weighted mode	5	0.0225305	0.310673	0.945669	1.01205	0.63844	1.60428
genus.Slackia.id.825	Keloid || id:ebi-a-GCST90018874	Weighted mode	6	0.0662676	0.297738	0.832677	1.20762	0.862926	1.69001
genus.Streptococcus.id.1853	Keloid || id:ebi-a-GCST90018874	Weighted mode	15	0.425902	0.295965	0.172124	1.12159	0.538351	2.3367
genus.Subdoligranulum.id.2070	Keloid || id:ebi-a-GCST90018874	Weighted mode	11	0.370671	0.391597	0.366173	0.992492	0.597223	1.64937
genus.Sutterella.id.2896	Keloid || id:ebi-a-GCST90018874	Weighted mode	12	-0.0690494	0.395198	0.864473	0.633549	0.166145	2.41587
genus.Terrisporobacter.id.11348	Keloid || id:ebi-a-GCST90018874	Weighted mode	5	-0.17737	0.258223	0.529905	1.17214	0.739623	1.85758
genus.Turicibacter.id.2162	Keloid || id:ebi-a-GCST90018874	Weighted mode	10	0.391584	0.371916	0.31984	1.06279	0.742479	1.52129
genus.Tyzzerella3.id.11335	Keloid || id:ebi-a-GCST90018874	Weighted mode	13	0.179251	0.186076	0.354397	1.31697	0.66091	2.62428
genus.Veillonella.id.2198	Keloid || id:ebi-a-GCST90018874	Weighted mode	8	-0.465358	0.344045	0.218243	1.24671	0.666501	2.33202
genus.Victivallis.id.2256	Keloid || id:ebi-a-GCST90018874	Weighted mode	10	0.265858	0.21648	0.250558	0.582584	0.257249	1.31936
order.Actinomycetales.id.420	Keloid || id:ebi-a-GCST90018874	Weighted mode	5	0.327374	0.433669	0.492323	1.03454	0.791597	1.35203
order.Bacillales.id.1674	Keloid || id:ebi-a-GCST90018874	Weighted mode	9	0.228377	0.227829	0.3455	1.01368	0.834115	1.2319
order.Bacteroidales.id.913	Keloid || id:ebi-a-GCST90018874	Weighted mode	14	0.0339603	0.256574	0.896726	1.07051	0.699991	1.63715
order.Bifidobacteriales.id.432	Keloid || id:ebi-a-GCST90018874	Weighted mode	12	0.287991	0.29122	0.343961	1.04937	0.722955	1.52315
order.Burkholderiales.id.2874	Keloid || id:ebi-a-GCST90018874	Weighted mode	11	0.101335	0.441712	0.823171	1.03931	0.390425	2.76663
order.Clostridiales.id.1863	Keloid || id:ebi-a-GCST90018874	Weighted mode	13	0.217417	0.394702	0.591851	1.1506	0.710809	1.8625
order.Coriobacteriales.id.810	Keloid || id:ebi-a-GCST90018874	Weighted mode	14	0.0585664	0.477401	0.904239	1.16813	0.816085	1.67204
order.Desulfovibrionales.id.3156	Keloid || id:ebi-a-GCST90018874	Weighted mode	12	0.323283	0.384481	0.418347	1.2681	0.569388	2.82421
order.Enterobacteriales.id.3468	Keloid || id:ebi-a-GCST90018874	Weighted mode	7	0.128144	0.414862	0.767855	1.14888	0.602142	2.19206
order.Erysipelotrichales.id.2148	Keloid || id:ebi-a-GCST90018874	Weighted mode	13	-0.082333	0.474449	0.865125	0.532029	0.172443	1.64144
order.Gastranaerophilales.id.1591	Keloid || id:ebi-a-GCST90018874	Weighted mode	9	-0.253011	0.295894	0.417382	1.00428	0.710511	1.41952
order.Lactobacillales.id.1800	Keloid || id:ebi-a-GCST90018874	Weighted mode	15	-0.0478028	0.331381	0.887356	1.12019	0.833506	1.50547
order.Methanobacteriales.id.120	Keloid || id:ebi-a-GCST90018874	Weighted mode	10	0.0459617	0.220561	0.839568	1.13335	0.637751	2.01407
order.MollicutesRF9.id.11579	Keloid || id:ebi-a-GCST90018874	Weighted mode	13	0.182104	0.410491	0.665207	0.926117	0.523554	1.63821
order.NB1n.id.3953	Keloid || id:ebi-a-GCST90018874	Weighted mode	13	-0.342593	0.332884	0.3237	0.479627	0.10809	2.12825
order.Pasteurellales.id.3688	Keloid || id:ebi-a-GCST90018874	Weighted mode	14	0.101741	0.221517	0.653611	0.784112	0.430091	1.42954
order.Rhodospirillales.id.2667	Keloid || id:ebi-a-GCST90018874	Weighted mode	14	-0.335713	0.282439	0.255849	0.997861	0.64336	1.5477
order.Selenomonadales.id.2165	Keloid || id:ebi-a-GCST90018874	Weighted mode	12	0.606725	0.449086	0.203823	0.744631	0.270931	2.04655
order.Verrucomicrobiales.id.4030	Keloid || id:ebi-a-GCST90018874	Weighted mode	11	-0.00937079	0.319513	0.97718	0.752041	0.271194	2.08547
order.Victivallales.id.2254	Keloid || id:ebi-a-GCST90018874	Weighted mode	8	-0.147264	0.23322	0.547812	1.33946	0.278736	6.43676
phylum.Actinobacteria.id.400	Keloid || id:ebi-a-GCST90018874	Weighted mode	15	0.251987	0.40521	0.544023	0.923943	0.564033	1.51351
phylum.Bacteroidetes.id.905	Keloid || id:ebi-a-GCST90018874	Weighted mode	12	-0.00753654	0.259147	0.97732	1.02429	0.702759	1.49293
phylum.Cyanobacteria.id.1500	Keloid || id:ebi-a-GCST90018874	Weighted mode	8	0.220512	0.319503	0.512311	0.887091	0.35013	2.24753
phylum.Euryarchaeota.id.55	Keloid || id:ebi-a-GCST90018874	Weighted mode	12	0.0481871	0.1901	0.80457	0.680377	0.338361	1.3681
phylum.Firmicutes.id.1672	Keloid || id:ebi-a-GCST90018874	Weighted mode	16	0.138789	0.329618	0.679683	1.23163	0.584609	2.59474
phylum.Lentisphaerae.id.2238	Keloid || id:ebi-a-GCST90018874	Weighted mode	9	-0.0767547	0.291	0.798631	1.12189	0.742733	1.69461
phylum.Proteobacteria.id.2375	Keloid || id:ebi-a-GCST90018874	Weighted mode	12	-0.284965	0.520386	0.594901	1.05199	0.782012	1.41517
phylum.Tenericutes.id.3919	Keloid || id:ebi-a-GCST90018874	Weighted mode	12	-0.385108	0.356394	0.303011	0.860811	0.45186	1.63988
phylum.Verrucomicrobia.id.3982	Keloid || id:ebi-a-GCST90018874	Weighted mode	12	0.167431	0.226385	0.47504	1.18226	0.758598	1.84254

## Sheet: Weighted Median
id.exposure	outcome	method	nsnp	b	se	p	OR	OR_lci95	OR_uci95
class.Actinobacteria.id.419	Keloid || id:ebi-a-GCST90018874	Weighted median	15	-0.0107826	0.251764	0.965838	0.729894	0.379579	1.40352
class.Alphaproteobacteria.id.2379	Keloid || id:ebi-a-GCST90018874	Weighted median	7	-0.063925	0.290262	0.82569	0.794782	0.466729	1.35342
class.Bacilli.id.1673	Keloid || id:ebi-a-GCST90018874	Weighted median	18	-0.0429146	0.224115	0.848146	1.30211	0.289139	5.86393
class.Bacteroidia.id.912	Keloid || id:ebi-a-GCST90018874	Weighted median	14	0.00252374	0.217003	0.990721	0.930212	0.604583	1.43122
class.Betaproteobacteria.id.2867	Keloid || id:ebi-a-GCST90018874	Weighted median	12	0.0539894	0.340783	0.87412	0.953205	0.699333	1.29924
class.Clostridia.id.1859	Keloid || id:ebi-a-GCST90018874	Weighted median	12	0.176311	0.304481	0.562553	0.857214	0.436948	1.6817
class.Coriobacteriia.id.809	Keloid || id:ebi-a-GCST90018874	Weighted median	14	-0.0107497	0.284704	0.969881	0.882027	0.485402	1.60274
class.Deltaproteobacteria.id.3087	Keloid || id:ebi-a-GCST90018874	Weighted median	13	0.289515	0.258261	0.26228	0.245361	0.0313115	1.92268
class.Erysipelotrichia.id.2147	Keloid || id:ebi-a-GCST90018874	Weighted median	13	0.105074	0.301196	0.727198	0.753601	0.448301	1.26681
class.Gammaproteobacteria.id.3303	Keloid || id:ebi-a-GCST90018874	Weighted median	6	-0.605557	0.377648	0.108825	0.688547	0.460616	1.02927
class.Lentisphaeria.id.2250	Keloid || id:ebi-a-GCST90018874	Weighted median	8	-0.0491106	0.190665	0.796735	0.741294	0.335003	1.64033
class.Melainabacteria.id.1589	Keloid || id:ebi-a-GCST90018874	Weighted median	10	-0.384595	0.210268	0.0673886	0.756361	0.372621	1.53529
class.Methanobacteria.id.119	Keloid || id:ebi-a-GCST90018874	Weighted median	10	0.0310175	0.158247	0.844604	0.60372	0.075735	4.81254
class.Mollicutes.id.3920	Keloid || id:ebi-a-GCST90018874	Weighted median	12	-0.0791053	0.244757	0.746544	0.859327	0.594268	1.24261
class.Negativicutes.id.2164	Keloid || id:ebi-a-GCST90018874	Weighted median	12	0.575209	0.284798	0.0434137	1.09661	0.792587	1.51726
class.Verrucomicrobiae.id.4029	Keloid || id:ebi-a-GCST90018874	Weighted median	11	-0.0677471	0.24923	0.785756	0.850758	0.487559	1.48452
family.Acidaminococcaceae.id.2166	Keloid || id:ebi-a-GCST90018874	Weighted median	7	-0.0344004	0.300167	0.908759	0.835524	0.493262	1.41527
family.Actinomycetaceae.id.421	Keloid || id:ebi-a-GCST90018874	Weighted median	5	0.222913	0.302579	0.461299	1.9765	0.681833	5.72946
family.Alcaligenaceae.id.2875	Keloid || id:ebi-a-GCST90018874	Weighted median	12	0.14378	0.331253	0.664252	0.690219	0.400959	1.18816
family.Bacteroidaceae.id.917	Keloid || id:ebi-a-GCST90018874	Weighted median	9	-0.0275998	0.373634	0.941115	0.786021	0.536455	1.15169
family.BacteroidalesS24.7group.id.11173	Keloid || id:ebi-a-GCST90018874	Weighted median	8	-0.0499954	0.209977	0.811804	0.692321	0.299654	1.59954
family.Bifidobacteriaceae.id.433	Keloid || id:ebi-a-GCST90018874	Weighted median	12	0.23009	0.254999	0.36689	0.66791	0.32643	1.36661
family.Christensenellaceae.id.1866	Keloid || id:ebi-a-GCST90018874	Weighted median	11	0.20008	0.189633	0.291384	2.21125	1.02941	4.74995
family.Clostridiaceae1.id.1869	Keloid || id:ebi-a-GCST90018874	Weighted median	10	-0.276183	0.290158	0.34118	1.30095	0.908607	1.86272
family.ClostridialesvadinBB60group.id.11286	Keloid || id:ebi-a-GCST90018874	Weighted median	15	-0.0162396	0.191294	0.932346	1.21252	0.912853	1.61057
family.Coriobacteriaceae.id.811	Keloid || id:ebi-a-GCST90018874	Weighted median	14	-0.0107497	0.283641	0.969768	1.3506	0.825868	2.20873
family.Defluviitaleaceae.id.1924	Keloid || id:ebi-a-GCST90018874	Weighted median	11	0.0224599	0.212695	0.915903	1.33531	0.861448	2.06984
family.Desulfovibrionaceae.id.3169	Keloid || id:ebi-a-GCST90018874	Weighted median	10	0.251953	0.280976	0.369875	1.6861	0.491057	5.78942
family.Enterobacteriaceae.id.3469	Keloid || id:ebi-a-GCST90018874	Weighted median	7	0.149498	0.30071	0.619084	1.15635	0.883727	1.51308
family.Erysipelotrichaceae.id.2149	Keloid || id:ebi-a-GCST90018874	Weighted median	13	0.105074	0.286423	0.713732	1.10178	0.823489	1.47412
family.FamilyXI.id.1936	Keloid || id:ebi-a-GCST90018874	Weighted median	8	0.0836491	0.141796	0.555239	1.36575	0.994844	1.87494
family.FamilyXIII.id.1957	Keloid || id:ebi-a-GCST90018874	Weighted median	10	-0.231072	0.369182	0.531378	1.24218	0.905536	1.70397
family.Lachnospiraceae.id.1987	Keloid || id:ebi-a-GCST90018874	Weighted median	17	0.178704	0.263312	0.497342	3.51639	0.510342	24.2289
family.Lactobacillaceae.id.1836	Keloid || id:ebi-a-GCST90018874	Weighted median	9	0.30595	0.201917	0.129715	1.479	0.815205	2.68332
family.Methanobacteriaceae.id.121	Keloid || id:ebi-a-GCST90018874	Weighted median	10	0.0310175	0.166795	0.852475	1.28302	0.831147	1.98057
family.Oxalobacteraceae.id.2966	Keloid || id:ebi-a-GCST90018874	Weighted median	14	0.127578	0.180312	0.47923	1.93829	0.690344	5.44217
family.Pasteurellaceae.id.3689	Keloid || id:ebi-a-GCST90018874	Weighted median	14	0.0811379	0.197416	0.681073	1.85483	0.709676	4.84783
family.Peptococcaceae.id.2024	Keloid || id:ebi-a-GCST90018874	Weighted median	9	-0.108589	0.250938	0.665209	0.774185	0.288935	2.07438
family.Peptostreptococcaceae.id.2042	Keloid || id:ebi-a-GCST90018874	Weighted median	14	0.201359	0.252666	0.425486	0.859752	0.613397	1.20505
family.Porphyromonadaceae.id.943	Keloid || id:ebi-a-GCST90018874	Weighted median	9	0.117087	0.376765	0.755977	0.891608	0.680155	1.1688
family.Prevotellaceae.id.960	Keloid || id:ebi-a-GCST90018874	Weighted median	16	0.0283749	0.236009	0.904303	1.02829	0.624527	1.69308
family.Rhodospirillaceae.id.2717	Keloid || id:ebi-a-GCST90018874	Weighted median	15	-0.44821	0.199961	0.0249947	0.80726	0.515963	1.26301
family.Rikenellaceae.id.967	Keloid || id:ebi-a-GCST90018874	Weighted median	19	0.228212	0.235663	0.332852	1.94634	0.08222	46.0743
family.Ruminococcaceae.id.2050	Keloid || id:ebi-a-GCST90018874	Weighted median	10	0.0409868	0.262265	0.875812	1.09227	0.51016	2.3386
family.Streptococcaceae.id.1850	Keloid || id:ebi-a-GCST90018874	Weighted median	14	0.445031	0.247035	0.0716257	1.06518	0.470035	2.4139
family.Veillonellaceae.id.2172	Keloid || id:ebi-a-GCST90018874	Weighted median	19	-0.0810489	0.221028	0.71385	1.00986	0.264137	3.8609
family.Verrucomicrobiaceae.id.4036	Keloid || id:ebi-a-GCST90018874	Weighted median	11	-0.0679418	0.243668	0.780376	1.18937	0.457638	3.09112
family.Victivallaceae.id.2255	Keloid || id:ebi-a-GCST90018874	Weighted median	12	0.0755561	0.132796	0.569381	2.96052	1.13794	7.70227
genus.Clostridiuminnocuumgroup.id.14397	Keloid || id:ebi-a-GCST90018874	Weighted median	9	-0.24523	0.179249	0.171282	0.949303	0.669887	1.34527
genus.Eubacteriumbrachygroup.id.11296	Keloid || id:ebi-a-GCST90018874	Weighted median	10	-0.0235774	0.16096	0.883542	0.902726	0.700939	1.1626
genus.Eubacteriumcoprostanoligenesgroup.id.11375	Keloid || id:ebi-a-GCST90018874	Weighted median	13	-0.177825	0.285934	0.534001	1.28307	0.70542	2.33373
genus.Eubacteriumeligensgroup.id.14372	Keloid || id:ebi-a-GCST90018874	Weighted median	7	-0.0170782	0.354218	0.961546	0.662203	0.380367	1.15287
genus.Eubacteriumfissicatenagroup.id.14373	Keloid || id:ebi-a-GCST90018874	Weighted median	9	0.175457	0.14474	0.225429	0.483875	0.143188	1.63516
genus.Eubacteriumhalliigroup.id.11338	Keloid || id:ebi-a-GCST90018874	Weighted median	16	-0.0128864	0.236371	0.956523	0.81356	0.54285	1.21927
genus.Eubacteriumnodatumgroup.id.11297	Keloid || id:ebi-a-GCST90018874	Weighted median	11	0.0627555	0.142009	0.658553	0.836675	0.625372	1.11937
genus.Eubacteriumoxidoreducensgroup.id.11339	Keloid || id:ebi-a-GCST90018874	Weighted median	5	0.0684797	0.199621	0.731562	0.658642	0.34121	1.27139
genus.Eubacteriumrectalegroup.id.14374	Keloid || id:ebi-a-GCST90018874	Weighted median	8	-0.518867	0.358765	0.148104	0.751109	0.427362	1.32011
genus.Eubacteriumruminantiumgroup.id.11340	Keloid || id:ebi-a-GCST90018874	Weighted median	18	0.183589	0.15138	0.225217	8.34741	1.12699	61.8278
genus.Eubacteriumventriosumgroup.id.11341	Keloid || id:ebi-a-GCST90018874	Weighted median	15	-0.150258	0.277591	0.588306	0.643939	0.332051	1.24878
genus.Eubacteriumxylanophilumgroup.id.14375	Keloid || id:ebi-a-GCST90018874	Weighted median	9	-0.354321	0.302141	0.240916	0.755759	0.42539	1.3427
genus.Ruminococcusgauvreauiigroup.id.11342	Keloid || id:ebi-a-GCST90018874	Weighted median	12	0.0795821	0.257841	0.757589	0.656726	0.222031	1.94247
genus.Ruminococcusgnavusgroup.id.14376	Keloid || id:ebi-a-GCST90018874	Weighted median	12	0.178943	0.170044	0.292647	0.57096	0.234862	1.38803
genus.Ruminococcustorquesgroup.id.14377	Keloid || id:ebi-a-GCST90018874	Weighted median	9	0.00986576	0.260665	0.969809	0.774742	0.197314	3.04199
genus.Actinomyces.id.423	Keloid || id:ebi-a-GCST90018874	Weighted median	7	0.103288	0.226773	0.648774	1.15177	0.825616	1.60677
genus.Adlercreutzia.id.812	Keloid || id:ebi-a-GCST90018874	Weighted median	8	0.30377	0.233775	0.193802	1.15046	0.889933	1.48726
genus.Akkermansia.id.4037	Keloid || id:ebi-a-GCST90018874	Weighted median	11	-0.0683136	0.252214	0.786502	1.2151	0.662234	2.22953
genus.Alistipes.id.968	Keloid || id:ebi-a-GCST90018874	Weighted median	14	0.286669	0.307841	0.351738	1.17969	0.669487	2.07871
genus.Allisonella.id.2174	Keloid || id:ebi-a-GCST90018874	Weighted median	8	-0.0199928	0.139523	0.886058	5.60164	0.267101	117.478
genus.Alloprevotella.id.961	Keloid || id:ebi-a-GCST90018874	Weighted median	6	0.182036	0.16079	0.257578	1.13838	0.511005	2.53602
genus.Anaerofilum.id.2053	Keloid || id:ebi-a-GCST90018874	Weighted median	11	0.0252766	0.161921	0.875951	1.23827	0.640066	2.39557
genus.Anaerostipes.id.1991	Keloid || id:ebi-a-GCST90018874	Weighted median	13	-0.278759	0.291121	0.338296	1.89666	0.582585	6.17479
genus.Anaerotruncus.id.2054	Keloid || id:ebi-a-GCST90018874	Weighted median	13	-0.257597	0.273507	0.34628	0.876563	0.301274	2.55038
genus.Bacteroides.id.918	Keloid || id:ebi-a-GCST90018874	Weighted median	9	-0.0275998	0.373472	0.94109	0.678278	0.247806	1.85654
genus.Barnesiella.id.944	Keloid || id:ebi-a-GCST90018874	Weighted median	14	0.0107447	0.260214	0.967063	1.24452	0.893217	1.73398
genus.Bifidobacterium.id.436	Keloid || id:ebi-a-GCST90018874	Weighted median	12	0.192576	0.222889	0.387589	1.13197	0.884361	1.44892
genus.Bilophila.id.3170	Keloid || id:ebi-a-GCST90018874	Weighted median	13	0.0764236	0.245707	0.755774	1.44544	0.859549	2.43068
genus.Blautia.id.1992	Keloid || id:ebi-a-GCST90018874	Weighted median	13	0.42336	0.278165	0.128016	1.31282	0.837922	2.05687
genus.Butyricicoccus.id.2055	Keloid || id:ebi-a-GCST90018874	Weighted median	8	0.251805	0.267737	0.346965	1.18598	0.487343	2.88617
genus.Butyricimonas.id.945	Keloid || id:ebi-a-GCST90018874	Weighted median	13	0.0265867	0.254902	0.91693	0.923959	0.629767	1.35558
genus.Butyrivibrio.id.1993	Keloid || id:ebi-a-GCST90018874	Weighted median	15	0.0830683	0.113177	0.462968	0.841707	0.63336	1.11859
genus.CandidatusSoleaferrea.id.11350	Keloid || id:ebi-a-GCST90018874	Weighted median	10	-0.0240094	0.18348	0.895889	1.00181	0.556943	1.80201
genus.Catenibacterium.id.2153	Keloid || id:ebi-a-GCST90018874	Weighted median	5	-0.0637347	0.222904	0.774933	0.995203	0.584405	1.69477
genus.ChristensenellaceaeR.7group.id.11283	Keloid || id:ebi-a-GCST90018874	Weighted median	10	-0.309425	0.317688	0.330062	1.09965	0.421008	2.87221
genus.Clostridiumsensustricto1.id.1873	Keloid || id:ebi-a-GCST90018874	Weighted median	7	-0.201254	0.278867	0.470489	1.29556	0.937218	1.79091
genus.Collinsella.id.815	Keloid || id:ebi-a-GCST90018874	Weighted median	9	0.441928	0.330666	0.181393	1.18742	0.925685	1.52315
genus.Coprobacter.id.949	Keloid || id:ebi-a-GCST90018874	Weighted median	11	-0.112886	0.201831	0.575948	1.40728	0.816137	2.42659
genus.Coprococcus1.id.11301	Keloid || id:ebi-a-GCST90018874	Weighted median	11	-0.502789	0.341419	0.140847	1.38696	0.906805	2.12135
genus.Coprococcus2.id.11302	Keloid || id:ebi-a-GCST90018874	Weighted median	8	-0.409098	0.282161	0.147094	0.702633	0.0811666	6.08246
genus.Coprococcus3.id.11303	Keloid || id:ebi-a-GCST90018874	Weighted median	9	-0.353474	0.333766	0.289579	0.956767	0.572912	1.59781
genus.DefluviitaleaceaeUCG011.id.11287	Keloid || id:ebi-a-GCST90018874	Weighted median	9	-0.00788853	0.219168	0.971288	0.993413	0.656898	1.50232
genus.Desulfovibrio.id.3173	Keloid || id:ebi-a-GCST90018874	Weighted median	10	0.0473056	0.222149	0.83137	0.875772	0.460412	1.66585
genus.Dialister.id.2183	Keloid || id:ebi-a-GCST90018874	Weighted median	11	-0.200859	0.280913	0.474596	0.894607	0.463511	1.72665
genus.Dorea.id.1997	Keloid || id:ebi-a-GCST90018874	Weighted median	10	0.150303	0.331267	0.650028	1.39633	0.178635	10.9147
genus.Eggerthella.id.819	Keloid || id:ebi-a-GCST90018874	Weighted median	11	0.00853486	0.192247	0.964589	1.03958	0.782391	1.38132
genus.Eisenbergiella.id.11304	Keloid || id:ebi-a-GCST90018874	Weighted median	11	-0.0574128	0.164333	0.726812	1.00905	0.753702	1.35091
genus.Enterorhabdus.id.820	Keloid || id:ebi-a-GCST90018874	Weighted median	6	-0.370205	0.211911	0.0806401	1.04125	0.623322	1.7394
genus.Erysipelatoclostridium.id.11381	Keloid || id:ebi-a-GCST90018874	Weighted median	15	0.0877167	0.191823	0.64747	1.02897	0.653282	1.62071
genus.ErysipelotrichaceaeUCG003.id.11384	Keloid || id:ebi-a-GCST90018874	Weighted median	16	-0.214006	0.222417	0.335958	0.865695	0.291766	2.56859
genus.Escherichia.Shigella.id.3504	Keloid || id:ebi-a-GCST90018874	Weighted median	10	-0.0449936	0.31917	0.887893	1.04246	0.678228	1.6023
genus.Faecalibacterium.id.2057	Keloid || id:ebi-a-GCST90018874	Weighted median	10	-0.236962	0.271606	0.382966	0.911753	0.676055	1.22963
genus.FamilyXIIIAD3011group.id.11293	Keloid || id:ebi-a-GCST90018874	Weighted median	13	0.33159	0.236562	0.161004	1.11857	0.548629	2.28058
genus.FamilyXIIIUCG001.id.11294	Keloid || id:ebi-a-GCST90018874	Weighted median	8	-0.143841	0.268169	0.591694	1.11857	0.531705	2.35317
genus.Flavonifractor.id.2059	Keloid || id:ebi-a-GCST90018874	Weighted median	5	-0.437363	0.391162	0.263519	1.0715	0.21508	5.33806
genus.Fusicatenibacter.id.11305	Keloid || id:ebi-a-GCST90018874	Weighted median	18	0.0971853	0.237647	0.682578	1.03557	0.759195	1.41255
genus.Gordonibacter.id.821	Keloid || id:ebi-a-GCST90018874	Weighted median	12	-0.159095	0.148065	0.282601	1.07891	0.848644	1.37166
genus.Haemophilus.id.3698	Keloid || id:ebi-a-GCST90018874	Weighted median	9	0.0236839	0.198315	0.904938	0.804264	0.453211	1.42724
genus.Holdemanella.id.11393	Keloid || id:ebi-a-GCST90018874	Weighted median	11	-0.151758	0.201177	0.450637	0.896326	0.557327	1.44152
genus.Holdemania.id.2157	Keloid || id:ebi-a-GCST90018874	Weighted median	15	0.218883	0.227372	0.335716	1.37963	0.502756	3.78587
genus.Howardella.id.2000	Keloid || id:ebi-a-GCST90018874	Weighted median	10	0.0186552	0.151397	0.901933	0.781122	0.502696	1.21376
genus.Hungatella.id.11306	Keloid || id:ebi-a-GCST90018874	Weighted median	5	0.0797562	0.233163	0.732304	0.898883	0.640404	1.26169
genus.Intestinibacter.id.11345	Keloid || id:ebi-a-GCST90018874	Weighted median	15	-0.00972428	0.200603	0.961338	0.890683	0.420376	1.88716
genus.Intestinimonas.id.2062	Keloid || id:ebi-a-GCST90018874	Weighted median	17	0.0303577	0.194033	0.875673	1.0775	0.515059	2.25412
genus.Lachnoclostridium.id.11308	Keloid || id:ebi-a-GCST90018874	Weighted median	13	-0.101265	0.308703	0.742886	3.5447	0.90236	13.9245
genus.Lachnospira.id.2004	Keloid || id:ebi-a-GCST90018874	Weighted median	6	-0.00587759	0.404079	0.988395	0.985717	0.571709	1.69953
genus.LachnospiraceaeFCS020group.id.11314	Keloid || id:ebi-a-GCST90018874	Weighted median	12	-0.054715	0.218782	0.802518	0.880858	0.591037	1.3128
genus.LachnospiraceaeNC2004group.id.11316	Keloid || id:ebi-a-GCST90018874	Weighted median	9	0.0147952	0.208789	0.943508	0.45489	0.161206	1.28361
genus.LachnospiraceaeND3007group.id.11317	Keloid || id:ebi-a-GCST90018874	Weighted median	3	0.054331	0.482033	0.910259	1.45044	0.624084	3.37099
genus.LachnospiraceaeNK4A136group.id.11319	Keloid || id:ebi-a-GCST90018874	Weighted median	15	-0.226279	0.217103	0.297289	0.557433	0.129104	2.40683
genus.LachnospiraceaeUCG001.id.11321	Keloid || id:ebi-a-GCST90018874	Weighted median	13	-0.0723428	0.219833	0.742095	1.4881	0.886291	2.49855
genus.LachnospiraceaeUCG004.id.11324	Keloid || id:ebi-a-GCST90018874	Weighted median	12	-0.282892	0.264999	0.285736	1.26608	0.865701	1.85162
genus.LachnospiraceaeUCG008.id.11328	Keloid || id:ebi-a-GCST90018874	Weighted median	11	-0.151605	0.188173	0.420434	1.79603	0.789706	4.08471
genus.LachnospiraceaeUCG010.id.11330	Keloid || id:ebi-a-GCST90018874	Weighted median	10	-0.370747	0.277117	0.180939	1.7056	0.712993	4.08009
genus.Lactobacillus.id.1837	Keloid || id:ebi-a-GCST90018874	Weighted median	10	0.263097	0.183132	0.150817	1.79857	0.631928	5.11904
genus.Lactococcus.id.1851	Keloid || id:ebi-a-GCST90018874	Weighted median	9	0.145269	0.137182	0.289621	1.4705	0.924978	2.33777
genus.Marvinbryantia.id.2005	Keloid || id:ebi-a-GCST90018874	Weighted median	10	0.391369	0.303921	0.197838	1.12858	0.766725	1.66121
genus.Methanobrevibacter.id.123	Keloid || id:ebi-a-GCST90018874	Weighted median	6	-0.151112	0.172261	0.380364	1.61085	0.56426	4.59868
genus.Odoribacter.id.952	Keloid || id:ebi-a-GCST90018874	Weighted median	7	0.0882602	0.388414	0.820243	1.61085	0.786983	3.29721
genus.Olsenella.id.822	Keloid || id:ebi-a-GCST90018874	Weighted median	11	-0.0520277	0.177867	0.769897	0.633246	0.0866627	4.62714
genus.Oscillibacter.id.2063	Keloid || id:ebi-a-GCST90018874	Weighted median	14	-0.206336	0.206422	0.317511	1.18097	0.637371	2.18818
genus.Oscillospira.id.2064	Keloid || id:ebi-a-GCST90018874	Weighted median	8	-0.440152	0.337916	0.19273	1.25618	0.786672	2.00589
genus.Oxalobacter.id.2978	Keloid || id:ebi-a-GCST90018874	Weighted median	11	0.1413	0.16986	0.405487	0.994975	0.402585	2.45904
genus.Parabacteroides.id.954	Keloid || id:ebi-a-GCST90018874	Weighted median	6	0.129609	0.408666	0.751129	1.15709	0.552833	2.42179
genus.Paraprevotella.id.962	Keloid || id:ebi-a-GCST90018874	Weighted median	13	0.218747	0.169221	0.196125	0.885735	0.242361	3.23702
genus.Parasutterella.id.2892	Keloid || id:ebi-a-GCST90018874	Weighted median	15	-0.0790878	0.19557	0.685921	0.814671	0.512158	1.29587
genus.Peptococcus.id.2037	Keloid || id:ebi-a-GCST90018874	Weighted median	12	0.258943	0.165195	0.116999	0.823307	0.576494	1.17579
genus.Phascolarctobacterium.id.2168	Keloid || id:ebi-a-GCST90018874	Weighted median	9	-0.0441954	0.261647	0.865866	0.617394	0.296446	1.28581
genus.Prevotella7.id.11182	Keloid || id:ebi-a-GCST90018874	Weighted median	11	0.0388187	0.14501	0.788932	0.623223	0.313867	1.23749
genus.Prevotella9.id.11183	Keloid || id:ebi-a-GCST90018874	Weighted median	15	0.0415829	0.219313	0.849619	0.74886	0.356525	1.57294
genus.RikenellaceaeRC9gutgroup.id.11191	Keloid || id:ebi-a-GCST90018874	Weighted median	11	0.0349502	0.158391	0.825359	0.883472	0.606533	1.28686
genus.Romboutsia.id.11347	Keloid || id:ebi-a-GCST90018874	Weighted median	13	-0.247024	0.22487	0.271976	0.915482	0.697412	1.20174
genus.Roseburia.id.2012	Keloid || id:ebi-a-GCST90018874	Weighted median	13	-0.0143857	0.277928	0.958719	0.664877	0.360863	1.22501
genus.Ruminiclostridium5.id.11355	Keloid || id:ebi-a-GCST90018874	Weighted median	11	0.397501	0.264393	0.132724	0.878958	0.555207	1.3915
genus.Ruminiclostridium6.id.11356	Keloid || id:ebi-a-GCST90018874	Weighted median	15	0.385605	0.236526	0.10304	1.13976	0.332783	3.90358
genus.Ruminiclostridium9.id.11357	Keloid || id:ebi-a-GCST90018874	Weighted median	9	0.166333	0.314661	0.597076	0.967562	0.596444	1.5696
genus.RuminococcaceaeNK4A214group.id.11358	Keloid || id:ebi-a-GCST90018874	Weighted median	13	-0.204971	0.236812	0.386742	1.06339	0.704446	1.60522
genus.RuminococcaceaeUCG002.id.11360	Keloid || id:ebi-a-GCST90018874	Weighted median	22	-0.123895	0.191888	0.518498	0.749312	0.299229	1.87638
genus.RuminococcaceaeUCG003.id.11361	Keloid || id:ebi-a-GCST90018874	Weighted median	12	-0.0329761	0.246834	0.893722	0.998778	0.507289	1.96644
genus.RuminococcaceaeUCG004.id.11362	Keloid || id:ebi-a-GCST90018874	Weighted median	11	0.300683	0.215153	0.162255	1.31326	0.187653	9.19063
genus.RuminococcaceaeUCG005.id.11363	Keloid || id:ebi-a-GCST90018874	Weighted median	14	0.0965001	0.223136	0.665398	1.35078	0.886018	2.05934
genus.RuminococcaceaeUCG009.id.11366	Keloid || id:ebi-a-GCST90018874	Weighted median	12	-0.0403484	0.185036	0.827385	1.1785	0.852662	1.62886
genus.RuminococcaceaeUCG010.id.11367	Keloid || id:ebi-a-GCST90018874	Weighted median	6	0.00891302	0.318532	0.977677	1.39398	0.735088	2.64348
genus.RuminococcaceaeUCG011.id.11368	Keloid || id:ebi-a-GCST90018874	Weighted median	8	0.00418459	0.165538	0.979833	1.40104	0.746595	2.62914
genus.RuminococcaceaeUCG013.id.11370	Keloid || id:ebi-a-GCST90018874	Weighted median	12	0.0100055	0.284035	0.971899	0.915247	0.323412	2.59012
genus.RuminococcaceaeUCG014.id.11371	Keloid || id:ebi-a-GCST90018874	Weighted median	11	-0.199002	0.269037	0.459493	1.10131	0.711169	1.70548
genus.Ruminococcus1.id.11373	Keloid || id:ebi-a-GCST90018874	Weighted median	10	-0.406116	0.321094	0.205946	1.21104	0.870557	1.68468
genus.Ruminococcus2.id.11374	Keloid || id:ebi-a-GCST90018874	Weighted median	15	-0.134382	0.229617	0.558384	0.961247	0.439803	2.10093
genus.Sellimonas.id.14369	Keloid || id:ebi-a-GCST90018874	Weighted median	9	-0.0769234	0.147531	0.602086	0.99003	0.500665	1.95772
genus.Senegalimassilia.id.11160	Keloid || id:ebi-a-GCST90018874	Weighted median	5	0.00914862	0.249417	0.97074	0.963949	0.250246	3.71313
genus.Slackia.id.825	Keloid || id:ebi-a-GCST90018874	Weighted median	6	-0.0388394	0.205119	0.849818	0.960455	0.668299	1.38033
genus.Streptococcus.id.1853	Keloid || id:ebi-a-GCST90018874	Weighted median	15	0.383758	0.262723	0.1441	0.874761	0.662782	1.15454
genus.Subdoligranulum.id.2070	Keloid || id:ebi-a-GCST90018874	Weighted median	11	0.198897	0.282476	0.481359	1.08439	0.621022	1.8935
genus.Sutterella.id.2896	Keloid || id:ebi-a-GCST90018874	Weighted median	12	-0.094919	0.272867	0.727947	1.10462	0.644525	1.89314
genus.Terrisporobacter.id.11348	Keloid || id:ebi-a-GCST90018874	Weighted median	5	-0.144393	0.236154	0.540911	1.8433	0.256496	13.2468
genus.Turicibacter.id.2162	Keloid || id:ebi-a-GCST90018874	Weighted median	10	0.288978	0.262515	0.270982	1.00895	0.540419	1.8837
genus.Tyzzerella3.id.11335	Keloid || id:ebi-a-GCST90018874	Weighted median	13	0.196181	0.143842	0.17261	1.06637	0.641979	1.77131
genus.Veillonella.id.2198	Keloid || id:ebi-a-GCST90018874	Weighted median	8	-0.364503	0.290739	0.209947	1.02302	0.436421	2.39806
genus.Victivallis.id.2256	Keloid || id:ebi-a-GCST90018874	Weighted median	10	0.133182	0.139718	0.340478	1.01885	0.432873	2.39804
order.Actinomycetales.id.420	Keloid || id:ebi-a-GCST90018874	Weighted median	5	0.222151	0.308993	0.47217	1.17287	0.371298	3.70489
order.Bacillales.id.1674	Keloid || id:ebi-a-GCST90018874	Weighted median	9	0.134715	0.157985	0.393822	1.00419	0.725953	1.38908
order.Bacteroidales.id.913	Keloid || id:ebi-a-GCST90018874	Weighted median	14	0.00252374	0.222199	0.990938	1.02283	0.806741	1.2968
order.Bifidobacteriales.id.432	Keloid || id:ebi-a-GCST90018874	Weighted median	12	0.23009	0.260377	0.37687	0.932758	0.555197	1.56708
order.Burkholderiales.id.2874	Keloid || id:ebi-a-GCST90018874	Weighted median	11	0.174202	0.31362	0.578582	1.02629	0.627115	1.67956
order.Clostridiales.id.1863	Keloid || id:ebi-a-GCST90018874	Weighted median	13	0.217533	0.28824	0.450433	0.66997	0.113003	3.97212
order.Coriobacteriales.id.810	Keloid || id:ebi-a-GCST90018874	Weighted median	14	-0.0107497	0.284522	0.969862	1.01006	0.578855	1.76247
order.Desulfovibrionales.id.3156	Keloid || id:ebi-a-GCST90018874	Weighted median	12	0.0441798	0.258004	0.864037	1.16797	0.676405	2.01678
order.Enterobacteriales.id.3468	Keloid || id:ebi-a-GCST90018874	Weighted median	7	0.149498	0.309906	0.629524	0.993078	0.402387	2.45089
order.Erysipelotrichales.id.2148	Keloid || id:ebi-a-GCST90018874	Weighted median	13	0.105074	0.293837	0.720649	0.967494	0.403327	2.32081
order.Gastranaerophilales.id.1591	Keloid || id:ebi-a-GCST90018874	Weighted median	9	-0.246347	0.201223	0.220859	1.42417	0.433575	4.67796
order.Lactobacillales.id.1800	Keloid || id:ebi-a-GCST90018874	Weighted median	15	-0.0624225	0.239773	0.794601	0.819548	0.483688	1.38862
order.Methanobacteriales.id.120	Keloid || id:ebi-a-GCST90018874	Weighted median	10	0.0310175	0.160238	0.846511	0.949149	0.625589	1.44006
order.MollicutesRF9.id.11579	Keloid || id:ebi-a-GCST90018874	Weighted median	13	0.0522784	0.247485	0.832701	0.719317	0.324517	1.59442
order.NB1n.id.3953	Keloid || id:ebi-a-GCST90018874	Weighted median	13	-0.0614786	0.157321	0.695956	0.775691	0.410823	1.46461
order.Pasteurellales.id.3688	Keloid || id:ebi-a-GCST90018874	Weighted median	14	0.0811379	0.194748	0.67695	0.600912	0.186053	1.94082
order.Rhodospirillales.id.2667	Keloid || id:ebi-a-GCST90018874	Weighted median	14	-0.277715	0.19214	0.14835	0.666233	0.355063	1.2501
order.Selenomonadales.id.2165	Keloid || id:ebi-a-GCST90018874	Weighted median	12	0.575209	0.281936	0.0413295	0.755586	0.484788	1.17765
order.Verrucomicrobiales.id.4030	Keloid || id:ebi-a-GCST90018874	Weighted median	11	-0.0677471	0.252213	0.788229	0.738775	0.298552	1.82812
order.Victivallales.id.2254	Keloid || id:ebi-a-GCST90018874	Weighted median	8	-0.0491106	0.192719	0.798854	0.706963	0.325027	1.53771
phylum.Actinobacteria.id.400	Keloid || id:ebi-a-GCST90018874	Weighted median	15	0.103509	0.300219	0.730262	0.592929	0.304485	1.15462
phylum.Bacteroidetes.id.905	Keloid || id:ebi-a-GCST90018874	Weighted median	12	0.0119747	0.235053	0.959369	0.874256	0.557424	1.37117
phylum.Cyanobacteria.id.1500	Keloid || id:ebi-a-GCST90018874	Weighted median	8	0.158831	0.234921	0.498975	0.93126	0.673935	1.28684
phylum.Euryarchaeota.id.55	Keloid || id:ebi-a-GCST90018874	Weighted median	12	0.0339535	0.136559	0.803643	0.663799	0.347951	1.26635
phylum.Firmicutes.id.1672	Keloid || id:ebi-a-GCST90018874	Weighted median	16	0.140285	0.245733	0.568079	0.813404	0.508353	1.30151
phylum.Lentisphaerae.id.2238	Keloid || id:ebi-a-GCST90018874	Weighted median	9	0.0042735	0.176554	0.980689	2.90797	0.579309	14.5972
phylum.Proteobacteria.id.2375	Keloid || id:ebi-a-GCST90018874	Weighted median	12	-0.243204	0.306406	0.427352	0.925961	0.693444	1.23644
phylum.Tenericutes.id.3919	Keloid || id:ebi-a-GCST90018874	Weighted median	12	-0.0791053	0.251805	0.753404	0.99805	0.791661	1.25825
phylum.Verrucomicrobia.id.3982	Keloid || id:ebi-a-GCST90018874	Weighted median	12	0.115017	0.210426	0.584659	0.921818	0.617652	1.37577
