# Supplementary material for: Causal relationship between gut microbiota and pathological scars: a two-sample Mendelian randomization study
Source: Front Med (Lausanne). 2024 Jul 2;11:1405097. doi: 10.3389/fmed.2024.1405097 (PMC11250559; doi:10.3389/fmed.2024.1405097)
Supplement: Supplementary file 2 [file Table_2.xlsx]

## Sheet: Inverse variance weighted
Table S2. MR analysis of gut microbiota on hypertrophic scar
id.exposure	outcome	method	nsnp	b	se	p	FDR adjusted p	or	or_lci95	or_uci95
class.Actinobacteria.id.419	Hypertrophic Scar	Inverse variance weighted	15	0.0493993	0.179504	0.783164	0.940252	1.05064	0.739021	1.49366
class.Alphaproteobacteria.id.2379	Hypertrophic Scar	Inverse variance weighted	7	-0.422329	0.258211	0.101924	0.671923	0.655518	0.395176	1.08737
class.Bacilli.id.1673	Hypertrophic Scar	Inverse variance weighted	8	-0.0398518	0.145894	0.784733	0.940364	0.960932	0.721947	1.27903
class.Bacteroidia.id.912	Hypertrophic Scar	Inverse variance weighted	10	0.047481	0.187612	0.800206	0.94145	1.04863	0.725975	1.51468
class.Betaproteobacteria.id.2867	Hypertrophic Scar	Inverse variance weighted	10	0.0412042	0.105499	0.696118	0.933279	1.04206	0.847408	1.28144
class.Clostridia.id.1859	Hypertrophic Scar	Inverse variance weighted	12	0.287558	0.159554	0.0715045	0.589627	1.33317	0.975146	1.82264
class.Coriobacteriia.id.809	Hypertrophic Scar	Inverse variance weighted	12	0.0985653	0.201899	0.625415	0.926292	1.10359	0.742927	1.63933
class.Deltaproteobacteria.id.3087	Hypertrophic Scar	Inverse variance weighted	11	-0.0502701	0.193971	0.79551	0.941124	0.950973	0.650214	1.39085
class.Erysipelotrichia.id.2147	Hypertrophic Scar	Inverse variance weighted	7	0.38147	0.186267	0.0405621	0.585299	1.46444	1.01652	2.10971
class.Gammaproteobacteria.id.3303	Hypertrophic Scar	Inverse variance weighted	18	0.00596883	0.177538	0.97318	0.95135	1.00599	0.710345	1.42467
class.Lentisphaeria.id.2250	Hypertrophic Scar	Inverse variance weighted	12	-0.0629758	0.203651	0.757144	0.938325	0.938966	0.629939	1.39959
class.Melainabacteria.id.1589	Hypertrophic Scar	Inverse variance weighted	10	-0.171948	0.213114	0.419761	0.894008	0.842023	0.554521	1.27859
class.Methanobacteria.id.119	Hypertrophic Scar	Inverse variance weighted	12	-0.0726995	0.197681	0.713051	0.93476	0.92988	0.631186	1.36992
class.Mollicutes.id.3920	Hypertrophic Scar	Inverse variance weighted	14	-0.247121	0.187025	0.186392	0.789268	0.781046	0.54135	1.12687
class.Negativicutes.id.2164	Hypertrophic Scar	Inverse variance weighted	13	0.261712	0.212201	0.217455	0.813764	1.29915	0.8571	1.9692
class.Verrucomicrobiae.id.4029	Hypertrophic Scar	Inverse variance weighted	13	0.367035	0.20274	0.0702387	0.585299	1.44345	0.970119	2.14772
family.Acidaminococcaceae.id.2166	Hypertrophic Scar	Inverse variance weighted	10	-0.299184	0.171389	0.0808732	1	0.741423	0.529879	1.03742
family.Actinomycetaceae.id.421	Hypertrophic Scar	Inverse variance weighted	13	0.104819	0.174532	0.548127	1	1.11051	0.788783	1.56346
family.Alcaligenaceae.id.2875	Hypertrophic Scar	Inverse variance weighted	8	0.0590101	0.205001	0.77346	1	1.06079	0.709785	1.58536
family.Bacteroidaceae.id.917	Hypertrophic Scar	Inverse variance weighted	5	-0.326114	0.23993	0.17408	1	0.721723	0.45096	1.15505
family.BacteroidalesS24.7group.id.11173	Hypertrophic Scar	Inverse variance weighted	18	0.303801	0.182567	0.0961025	1	1.355	0.947403	1.93795
family.Bifidobacteriaceae.id.433	Hypertrophic Scar	Inverse variance weighted	11	0.0134314	0.0978844	0.890859	1	1.01352	0.836589	1.22787
family.Christensenellaceae.id.1866	Hypertrophic Scar	Inverse variance weighted	9	0.174181	0.145837	0.23234	1	1.19027	0.894349	1.58411
family.Clostridiaceae1.id.1869	Hypertrophic Scar	Inverse variance weighted	11	-0.0291733	0.125754	0.816548	1	0.971248	0.759077	1.24272
family.ClostridialesvadinBB60group.id.11286	Hypertrophic Scar	Inverse variance weighted	15	0.00350863	0.138967	0.979857	1	1.00351	0.764245	1.3177
family.Coriobacteriaceae.id.811	Hypertrophic Scar	Inverse variance weighted	10	-0.0711662	0.0961553	0.459229	1	0.931307	0.771336	1.12445
family.Defluviitaleaceae.id.1924	Hypertrophic Scar	Inverse variance weighted	5	0.0466595	0.155251	0.763763	1	1.04777	0.772879	1.42042
family.Desulfovibrionaceae.id.3169	Hypertrophic Scar	Inverse variance weighted	14	-0.09907	0.181408	0.584986	1	0.905679	0.634683	1.29239
family.Enterobacteriaceae.id.3469	Hypertrophic Scar	Inverse variance weighted	16	-0.0656028	0.141058	0.641876	1	0.936503	0.710294	1.23475
family.Erysipelotrichaceae.id.2149	Hypertrophic Scar	Inverse variance weighted	13	-0.121907	0.190651	0.522545	1	0.88523	0.609215	1.2863
family.FamilyXI.id.1936	Hypertrophic Scar	Inverse variance weighted	6	0.0833746	0.294583	0.777157	1	1.08695	0.610176	1.93626
family.FamilyXIII.id.1957	Hypertrophic Scar	Inverse variance weighted	12	0.0829315	0.177278	0.639923	1	1.08647	0.767565	1.53787
family.Lachnospiraceae.id.1987	Hypertrophic Scar	Inverse variance weighted	9	0.0959959	0.15104	0.52506	1	1.10075	0.818696	1.47999
family.Lactobacillaceae.id.1836	Hypertrophic Scar	Inverse variance weighted	3	-0.0685683	0.396167	0.862589	1	0.93373	0.429534	2.02976
family.Methanobacteriaceae.id.121	Hypertrophic Scar	Inverse variance weighted	15	-0.0763962	0.15477	0.62158	1	0.926449	0.684036	1.25477
family.Oxalobacteraceae.id.2966	Hypertrophic Scar	Inverse variance weighted	13	-0.154802	0.139898	0.268496	1	0.856585	0.651159	1.12682
family.Pasteurellaceae.id.3689	Hypertrophic Scar	Inverse variance weighted	12	-0.175829	0.189894	0.354481	1	0.838762	0.578093	1.21697
family.Peptococcaceae.id.2024	Hypertrophic Scar	Inverse variance weighted	10	0.0291565	0.149538	0.845411	1	1.02959	0.768021	1.38023
family.Peptostreptococcaceae.id.2042	Hypertrophic Scar	Inverse variance weighted	10	0.0428802	0.199287	0.829637	1	1.04381	0.706294	1.54262
family.Porphyromonadaceae.id.943	Hypertrophic Scar	Inverse variance weighted	8	0.0764868	0.134769	0.570349	1	1.07949	0.828896	1.40584
family.Prevotellaceae.id.960	Hypertrophic Scar	Inverse variance weighted	9	0.140625	0.164079	0.391412	1	1.15099	0.834461	1.58759
family.Rhodospirillaceae.id.2717	Hypertrophic Scar	Inverse variance weighted	10	0.346161	0.189556	0.067825	1	1.41363	0.97495	2.0497
family.Rikenellaceae.id.967	Hypertrophic Scar	Inverse variance weighted	6	-0.0370522	0.141253	0.793082	1	0.963626	0.730586	1.271
family.Ruminococcaceae.id.2050	Hypertrophic Scar	Inverse variance weighted	7	0.0860306	0.234147	0.713305	1	1.08984	0.688736	1.72454
family.Streptococcaceae.id.1850	Hypertrophic Scar	Inverse variance weighted	11	0.0197766	0.0956057	0.836122	1	1.01997	0.845683	1.23018
family.Veillonellaceae.id.2172	Hypertrophic Scar	Inverse variance weighted	13	-0.120459	0.151586	0.426813	1	0.886514	0.658648	1.19321
family.Verrucomicrobiaceae.id.4036	Hypertrophic Scar	Inverse variance weighted	8	0.129365	0.184925	0.484205	1	1.13811	0.792084	1.63529
family.Victivallaceae.id.2255	Hypertrophic Scar	Inverse variance weighted	11	-0.109604	0.103616	0.290153	1	0.896189	0.731475	1.09799
genus.Clostridiuminnocuumgroup.id.14397	Hypertrophic Scar	Inverse variance weighted	5	0.518444	0.347807	0.136065	1	1.67941	0.849372	3.3206
genus.Eubacteriumbrachygroup.id.11296	Hypertrophic Scar	Inverse variance weighted	13	0.107366	0.116676	0.357465	1	1.11334	0.885752	1.39941
genus.Eubacteriumcoprostanoligenesgroup.id.11375	Hypertrophic Scar	Inverse variance weighted	14	0.0355561	0.137391	0.795794	1	1.0362	0.791575	1.35641
genus.Eubacteriumeligensgroup.id.14372	Hypertrophic Scar	Inverse variance weighted	12	0.00745079	0.136911	0.9566	1	1.00748	0.770362	1.31758
genus.Eubacteriumfissicatenagroup.id.14373	Hypertrophic Scar	Inverse variance weighted	9	0.109069	0.186031	0.557679	1	1.11524	0.774488	1.60591
genus.Eubacteriumhalliigroup.id.11338	Hypertrophic Scar	Inverse variance weighted	11	-0.0750711	0.0981113	0.444174	1	0.927677	0.76539	1.12437
genus.Eubacteriumnodatumgroup.id.11297	Hypertrophic Scar	Inverse variance weighted	15	0.115574	0.137292	0.399891	1	1.12252	0.857686	1.46912
genus.Eubacteriumoxidoreducensgroup.id.11339	Hypertrophic Scar	Inverse variance weighted	11	-0.029073	0.109247	0.790146	1	0.971346	0.784117	1.20328
genus.Eubacteriumrectalegroup.id.14374	Hypertrophic Scar	Inverse variance weighted	13	0.0294672	0.229984	0.898048	1	1.02991	0.656193	1.61645
genus.Eubacteriumruminantiumgroup.id.11340	Hypertrophic Scar	Inverse variance weighted	14	-0.134051	0.20108	0.504992	1	0.874545	0.589684	1.29702
genus.Eubacteriumventriosumgroup.id.11341	Hypertrophic Scar	Inverse variance weighted	10	-0.0448085	0.218717	0.837674	1	0.956181	0.622822	1.46797
genus.Eubacteriumxylanophilumgroup.id.14375	Hypertrophic Scar	Inverse variance weighted	16	-0.122203	0.170515	0.473577	1	0.884969	0.633553	1.23616
genus.Ruminococcusgauvreauiigroup.id.11342	Hypertrophic Scar	Inverse variance weighted	9	0.299631	0.251185	0.23292	1	1.34936	0.824736	2.20771
genus.Ruminococcusgnavusgroup.id.14376	Hypertrophic Scar	Inverse variance weighted	13	-0.168924	0.176717	0.339123	1	0.844573	0.597327	1.19416
genus.Ruminococcustorquesgroup.id.14377	Hypertrophic Scar	Inverse variance weighted	21	-0.0876732	0.135597	0.517909	1	0.91606	0.702266	1.19494
genus.Actinomyces.id.423	Hypertrophic Scar	Inverse variance weighted	12	0.135106	0.17184	0.431733	1	1.14466	0.817339	1.60306
genus.Adlercreutzia.id.812	Hypertrophic Scar	Inverse variance weighted	11	0.152673	0.163238	0.349643	1	1.16494	0.845969	1.60419
genus.Akkermansia.id.4037	Hypertrophic Scar	Inverse variance weighted	14	-0.0324891	0.229398	0.887374	1	0.968033	0.61748	1.5176
genus.Alistipes.id.968	Hypertrophic Scar	Inverse variance weighted	11	-0.169247	0.154939	0.274679	1	0.8443	0.623176	1.14389
genus.Allisonella.id.2174	Hypertrophic Scar	Inverse variance weighted	6	-0.175615	0.224638	0.434352	1	0.838941	0.540152	1.30301
genus.Alloprevotella.id.961	Hypertrophic Scar	Inverse variance weighted	8	0.16306	0.157949	0.301905	1	1.17711	0.863708	1.60422
genus.Anaerofilum.id.2053	Hypertrophic Scar	Inverse variance weighted	11	-0.125605	0.193184	0.515574	1	0.881963	0.603961	1.28793
genus.Anaerostipes.id.1991	Hypertrophic Scar	Inverse variance weighted	11	-0.166038	0.180681	0.358118	1	0.847014	0.594418	1.20695
genus.Anaerotruncus.id.2054	Hypertrophic Scar	Inverse variance weighted	10	0.043678	0.240814	0.856072	1	1.04465	0.651604	1.67477
genus.Bacteroides.id.918	Hypertrophic Scar	Inverse variance weighted	15	-0.179324	0.147961	0.225525	1	0.835835	0.625422	1.11704
genus.Barnesiella.id.944	Hypertrophic Scar	Inverse variance weighted	9	-0.0413306	0.102752	0.68751	1	0.959512	0.784488	1.17359
genus.Bifidobacterium.id.436	Hypertrophic Scar	Inverse variance weighted	5	-0.110701	0.213751	0.604529	1	0.895206	0.588809	1.36104
genus.Bilophila.id.3170	Hypertrophic Scar	Inverse variance weighted	6	0.117825	0.186612	0.527784	1	1.12505	0.780412	1.62188
genus.Blautia.id.1992	Hypertrophic Scar	Inverse variance weighted	15	-0.038734	0.175871	0.825684	1	0.962007	0.681512	1.35795
genus.Butyricicoccus.id.2055	Hypertrophic Scar	Inverse variance weighted	11	0.489274	0.192548	0.0110522	1	1.63113	1.11838	2.37897
genus.Butyricimonas.id.945	Hypertrophic Scar	Inverse variance weighted	12	-0.0818089	0.174459	0.639121	1	0.921448	0.654588	1.2971
genus.Butyrivibrio.id.1993	Hypertrophic Scar	Inverse variance weighted	5	0.0269512	0.201876	0.893795	1	1.02732	0.691615	1.52597
genus.CandidatusSoleaferrea.id.11350	Hypertrophic Scar	Inverse variance weighted	10	-0.0100412	0.158022	0.949334	1	0.990009	0.726321	1.34943
genus.Catenibacterium.id.2153	Hypertrophic Scar	Inverse variance weighted	13	0.086956	0.108936	0.424738	1	1.09085	0.881122	1.35049
genus.ChristensenellaceaeR.7group.id.11283	Hypertrophic Scar	Inverse variance weighted	6	-0.15217	0.327347	0.642034	1	0.858843	0.452137	1.63139
genus.Clostridiumsensustricto1.id.1873	Hypertrophic Scar	Inverse variance weighted	10	0.123936	0.123011	0.313687	1	1.13194	0.889437	1.44057
genus.Collinsella.id.815	Hypertrophic Scar	Inverse variance weighted	8	-0.0768297	0.115607	0.50632	1	0.926048	0.73829	1.16155
genus.Coprobacter.id.949	Hypertrophic Scar	Inverse variance weighted	10	-0.198453	0.108344	0.0669973	1	0.819998	0.663114	1.014
genus.Coprococcus1.id.11301	Hypertrophic Scar	Inverse variance weighted	13	-0.42677	0.200212	0.0330409	1	0.652614	0.44079	0.96623
genus.Coprococcus2.id.11302	Hypertrophic Scar	Inverse variance weighted	7	-0.0668422	0.252185	0.790969	1	0.935343	0.570567	1.53333
genus.Coprococcus3.id.11303	Hypertrophic Scar	Inverse variance weighted	9	0.254526	0.115662	0.0277634	1	1.28985	1.02822	1.61805
genus.DefluviitaleaceaeUCG011.id.11287	Hypertrophic Scar	Inverse variance weighted	14	-0.0239253	0.182676	0.895798	1	0.976359	0.682515	1.39671
genus.Desulfovibrio.id.3173	Hypertrophic Scar	Inverse variance weighted	11	0.0937719	0.0944613	0.320855	1	1.09831	0.912678	1.3217
genus.Dialister.id.2183	Hypertrophic Scar	Inverse variance weighted	5	0.0115501	0.172759	0.946696	1	1.01162	0.721043	1.41929
genus.Dorea.id.1997	Hypertrophic Scar	Inverse variance weighted	8	-0.18202	0.238629	0.445599	1	0.833585	0.522185	1.33068
genus.Eggerthella.id.819	Hypertrophic Scar	Inverse variance weighted	18	0.0844152	0.118564	0.476478	1	1.08808	0.862456	1.37273
genus.Eisenbergiella.id.11304	Hypertrophic Scar	Inverse variance weighted	15	0.220899	0.167723	0.187823	1	1.2472	0.897773	1.73262
genus.Enterorhabdus.id.820	Hypertrophic Scar	Inverse variance weighted	9	-0.105148	0.184302	0.568325	1	0.900191	0.627269	1.29186
genus.Erysipelatoclostridium.id.11381	Hypertrophic Scar	Inverse variance weighted	12	0.0161289	0.171788	0.925198	1	1.01626	0.725731	1.4231
genus.ErysipelotrichaceaeUCG003.id.11384	Hypertrophic Scar	Inverse variance weighted	11	0.109111	0.126579	0.38869	1	1.11529	0.870241	1.42933
genus.Escherichia.Shigella.id.3504	Hypertrophic Scar	Inverse variance weighted	9	0.00297507	0.247612	0.990414	1	1.00298	0.617335	1.62953
genus.Faecalibacterium.id.2057	Hypertrophic Scar	Inverse variance weighted	7	-0.0776441	0.162756	0.633321	1	0.925294	0.672572	1.27298
genus.FamilyXIIIAD3011group.id.11293	Hypertrophic Scar	Inverse variance weighted	8	0.329554	0.174748	0.059312	1	1.39035	0.98713	1.95827
genus.FamilyXIIIUCG001.id.11294	Hypertrophic Scar	Inverse variance weighted	11	-0.0504041	0.193942	0.794947	1	0.950845	0.650164	1.39058
genus.Flavonifractor.id.2059	Hypertrophic Scar	Inverse variance weighted	13	0.373828	0.210236	0.0753818	1	1.45329	0.962487	2.19436
genus.Fusicatenibacter.id.11305	Hypertrophic Scar	Inverse variance weighted	8	-0.0938459	0.103384	0.364014	1	0.910423	0.743432	1.11492
genus.Gordonibacter.id.821	Hypertrophic Scar	Inverse variance weighted	5	-0.0613834	0.131208	0.639904	1	0.940463	0.727202	1.21626
genus.Haemophilus.id.3698	Hypertrophic Scar	Inverse variance weighted	10	0.0429378	0.153068	0.779082	1	1.04387	0.77331	1.4091
genus.Holdemanella.id.11393	Hypertrophic Scar	Inverse variance weighted	13	0.149803	0.283945	0.597792	1	1.16161	0.665824	2.02655
genus.Holdemania.id.2157	Hypertrophic Scar	Inverse variance weighted	13	-0.21542	0.1877	0.251098	1	0.806202	0.558047	1.16471
genus.Howardella.id.2000	Hypertrophic Scar	Inverse variance weighted	9	-0.208481	0.22445	0.352967	1	0.811817	0.52288	1.26042
genus.Hungatella.id.11306	Hypertrophic Scar	Inverse variance weighted	13	-0.0222472	0.175148	0.898925	1	0.977998	0.693823	1.37857
genus.Intestinibacter.id.11345	Hypertrophic Scar	Inverse variance weighted	12	0.177485	0.155714	0.254365	1	1.19421	0.880104	1.62042
genus.Intestinimonas.id.2062	Hypertrophic Scar	Inverse variance weighted	13	-0.102731	0.175043	0.557278	1	0.90237	0.640303	1.2717
genus.Lachnoclostridium.id.11308	Hypertrophic Scar	Inverse variance weighted	13	-0.0184942	0.224202	0.934258	1	0.981676	0.632591	1.5234
genus.Lachnospira.id.2004	Hypertrophic Scar	Inverse variance weighted	8	0.214222	0.23	0.351646	1	1.2389	0.789324	1.94453
genus.LachnospiraceaeFCS020group.id.11314	Hypertrophic Scar	Inverse variance weighted	13	0.0791196	0.162025	0.625326	1	1.08233	0.787848	1.48689
genus.LachnospiraceaeNC2004group.id.11316	Hypertrophic Scar	Inverse variance weighted	15	0.0576213	0.0785655	0.463304	1	1.05931	0.908131	1.23567
genus.LachnospiraceaeND3007group.id.11317	Hypertrophic Scar	Inverse variance weighted	9	-0.0207641	0.173607	0.904797	1	0.97945	0.696956	1.37645
genus.LachnospiraceaeNK4A136group.id.11319	Hypertrophic Scar	Inverse variance weighted	4	-0.163672	0.155763	0.293362	1	0.84902	0.625648	1.15214
genus.LachnospiraceaeUCG001.id.11321	Hypertrophic Scar	Inverse variance weighted	9	-0.545855	0.295576	0.0647838	1	0.579346	0.324593	1.03404
genus.LachnospiraceaeUCG004.id.11324	Hypertrophic Scar	Inverse variance weighted	7	-0.133334	0.200825	0.506735	1	0.875173	0.590402	1.2973
genus.LachnospiraceaeUCG008.id.11328	Hypertrophic Scar	Inverse variance weighted	9	-0.0210242	0.227896	0.926496	1	0.979195	0.626442	1.53059
genus.LachnospiraceaeUCG010.id.11330	Hypertrophic Scar	Inverse variance weighted	11	-0.0637754	0.13142	0.627478	1	0.938216	0.725163	1.21386
genus.Lactobacillus.id.1837	Hypertrophic Scar	Inverse variance weighted	12	-0.173391	0.196032	0.376424	1	0.840809	0.572574	1.2347
genus.Lactococcus.id.1851	Hypertrophic Scar	Inverse variance weighted	8	0.106502	0.245624	0.66458	1	1.11238	0.687344	1.80025
genus.Marvinbryantia.id.2005	Hypertrophic Scar	Inverse variance weighted	9	-0.325077	0.232309	0.161714	1	0.722472	0.458222	1.13911
genus.Methanobrevibacter.id.123	Hypertrophic Scar	Inverse variance weighted	9	0.026737	0.167394	0.873097	1	1.0271	0.739815	1.42594
genus.Odoribacter.id.952	Hypertrophic Scar	Inverse variance weighted	10	-0.0526853	0.163659	0.747512	1	0.948679	0.688351	1.30746
genus.Olsenella.id.822	Hypertrophic Scar	Inverse variance weighted	10	-0.171379	0.182861	0.348649	1	0.842502	0.588731	1.20566
genus.Oscillibacter.id.2063	Hypertrophic Scar	Inverse variance weighted	10	0.0305926	0.299842	0.918734	1	1.03107	0.572869	1.85574
genus.Oscillospira.id.2064	Hypertrophic Scar	Inverse variance weighted	10	-0.223701	0.132829	0.0921573	1	0.799554	0.616285	1.03732
genus.Oxalobacter.id.2978	Hypertrophic Scar	Inverse variance weighted	11	0.170051	0.11984	0.155905	1	1.18536	0.937221	1.49921
genus.Parabacteroides.id.954	Hypertrophic Scar	Inverse variance weighted	6	-0.0286738	0.201633	0.886916	1	0.971733	0.654506	1.44272
genus.Paraprevotella.id.962	Hypertrophic Scar	Inverse variance weighted	15	-0.0131057	0.148939	0.929882	1	0.98698	0.737104	1.32156
genus.Parasutterella.id.2892	Hypertrophic Scar	Inverse variance weighted	16	-0.308863	0.151664	0.0417011	1	0.734281	0.54546	0.988466
genus.Peptococcus.id.2037	Hypertrophic Scar	Inverse variance weighted	10	0.0365899	0.194345	0.850663	1	1.03727	0.708697	1.51817
genus.Phascolarctobacterium.id.2168	Hypertrophic Scar	Inverse variance weighted	4	-0.20557	0.211236	0.330467	0.692492	0.814183	0.538163	1.23177
genus.Prevotella7.id.11182	Hypertrophic Scar	Inverse variance weighted	8	-0.0562242	0.105624	0.594516	0.802031	0.945327	0.768551	1.16276
genus.Prevotella9.id.11183	Hypertrophic Scar	Inverse variance weighted	12	-0.0629758	0.203651	0.757144	0.837649	0.938966	0.629939	1.39959
genus.RikenellaceaeRC9gutgroup.id.11191	Hypertrophic Scar	Inverse variance weighted	11	-0.0393007	0.170328	0.81752	0.847815	0.961462	0.688567	1.34251
genus.Romboutsia.id.11347	Hypertrophic Scar	Inverse variance weighted	10	-0.191016	0.210117	0.363302	0.712288	0.82612	0.547252	1.24709
genus.Roseburia.id.2012	Hypertrophic Scar	Inverse variance weighted	13	-0.0181158	0.193244	0.925311	0.863116	0.982047	0.672419	1.43425
genus.Ruminiclostridium5.id.11355	Hypertrophic Scar	Inverse variance weighted	14	-0.247121	0.187025	0.186392	0.559502	0.781046	0.54135	1.12687
genus.Ruminiclostridium6.id.11356	Hypertrophic Scar	Inverse variance weighted	12	0.295338	0.216847	0.173209	0.549308	1.34358	0.878375	2.05517
genus.Ruminiclostridium9.id.11357	Hypertrophic Scar	Inverse variance weighted	7	0.0140243	0.309425	0.963849	0.867866	1.01412	0.552972	1.85985
genus.RuminococcaceaeNK4A214group.id.11358	Hypertrophic Scar	Inverse variance weighted	13	0.367035	0.20274	0.0702387	0.477866	1.44345	0.970119	2.14772
genus.RuminococcaceaeUCG002.id.11360	Hypertrophic Scar	Inverse variance weighted	9	-0.0561429	0.196048	0.774592	0.840724	0.945404	0.643781	1.38834
genus.RuminococcaceaeUCG003.id.11361	Hypertrophic Scar	Inverse variance weighted	15	-0.287632	0.174034	0.0983846	0.477866	0.750038	0.533264	1.05493
genus.RuminococcaceaeUCG004.id.11362	Hypertrophic Scar	Inverse variance weighted	10	0.0412042	0.105499	0.696118	0.825895	1.04206	0.847408	1.28144
genus.RuminococcaceaeUCG005.id.11363	Hypertrophic Scar	Inverse variance weighted	13	0.243434	0.147785	0.099513	0.477866	1.27562	0.954828	1.70419
genus.RuminococcaceaeUCG009.id.11366	Hypertrophic Scar	Inverse variance weighted	12	0.0435774	0.141929	0.758815	0.837949	1.04454	0.790885	1.37955
genus.RuminococcaceaeUCG010.id.11367	Hypertrophic Scar	Inverse variance weighted	14	0.194314	0.121446	0.109598	0.477866	1.21448	0.957221	1.54087
genus.RuminococcaceaeUCG011.id.11368	Hypertrophic Scar	Inverse variance weighted	14	0.0388207	0.124636	0.755441	0.837343	1.03958	0.814269	1.32725
genus.RuminococcaceaeUCG013.id.11370	Hypertrophic Scar	Inverse variance weighted	12	0.0985653	0.201899	0.625415	0.809953	1.10359	0.742927	1.63933
genus.RuminococcaceaeUCG014.id.11371	Hypertrophic Scar	Inverse variance weighted	11	-0.0502701	0.193971	0.79551	0.84426	0.950973	0.650214	1.39085
genus.Ruminococcus1.id.11373	Hypertrophic Scar	Inverse variance weighted	8	-0.0398518	0.145894	0.784733	0.842458	0.960932	0.721947	1.27903
genus.Ruminococcus2.id.11374	Hypertrophic Scar	Inverse variance weighted	7	0.18043	0.194931	0.354649	0.912966	1.19773	0.817394	1.75504
genus.Sellimonas.id.14369	Hypertrophic Scar	Inverse variance weighted	4	-0.205538	0.211089	0.330204	0.907122	0.814209	0.538336	1.23146
genus.Senegalimassilia.id.11160	Hypertrophic Scar	Inverse variance weighted	11	-0.022131	0.211349	0.916604	0.964427	0.978112	0.646375	1.48011
genus.Slackia.id.825	Hypertrophic Scar	Inverse variance weighted	9	-0.208481	0.22445	0.352967	0.912588	0.811817	0.52288	1.26042
genus.Streptococcus.id.1853	Hypertrophic Scar	Inverse variance weighted	8	-0.0339034	0.180166	0.850736	0.961778	0.966665	0.679071	1.37606
genus.Subdoligranulum.id.2070	Hypertrophic Scar	Inverse variance weighted	11	-0.0393007	0.170328	0.81752	0.960287	0.961462	0.688567	1.34251
genus.Sutterella.id.2896	Hypertrophic Scar	Inverse variance weighted	11	-0.253162	0.176511	0.151498	0.817551	0.776342	0.549293	1.09724
genus.Terrisporobacter.id.11348	Hypertrophic Scar	Inverse variance weighted	10	-0.406678	0.192799	0.0349156	0.54038	0.665858	0.456318	0.971619
genus.Turicibacter.id.2162	Hypertrophic Scar	Inverse variance weighted	15	-0.247457	0.134725	0.0662466	0.665188	0.780784	0.599584	1.01674
genus.Tyzzerella3.id.11335	Hypertrophic Scar	Inverse variance weighted	14	-0.247121	0.187025	0.186392	0.846463	0.781046	0.54135	1.12687
genus.Veillonella.id.2198	Hypertrophic Scar	Inverse variance weighted	11	-0.0254391	0.158703	0.87265	0.962702	0.974882	0.714268	1.33058
genus.Victivallis.id.2256	Hypertrophic Scar	Inverse variance weighted	10	0.451634	0.184576	0.0144102	0.446047	1.57088	1.09403	2.25557
order.Actinomycetales.id.420	Hypertrophic Scar	Inverse variance weighted	7	0.0140243	0.309425	0.963849	0.966112	1.01412	0.552972	1.85985
order.Bacillales.id.1674	Hypertrophic Scar	Inverse variance weighted	13	0.367035	0.20274	0.0702387	0.675063	1.44345	0.970119	2.14772
order.Bacteroidales.id.913	Hypertrophic Scar	Inverse variance weighted	8	-0.0145374	0.113015	0.897648	0.963703	0.985568	0.789744	1.22995
order.Bifidobacteriales.id.432	Hypertrophic Scar	Inverse variance weighted	10	-0.211097	0.199827	0.290787	0.895843	0.809696	0.5473	1.19789
order.Burkholderiales.id.2874	Hypertrophic Scar	Inverse variance weighted	16	-0.11074	0.202053	0.583642	0.945244	0.895171	0.602441	1.33014
order.Clostridiales.id.1863	Hypertrophic Scar	Inverse variance weighted	8	0.126685	0.139918	0.365244	0.915277	1.13506	0.862815	1.49321
order.Coriobacteriales.id.810	Hypertrophic Scar	Inverse variance weighted	10	0.0412042	0.105499	0.696118	0.953682	1.04206	0.847408	1.28144
order.Desulfovibrionales.id.3156	Hypertrophic Scar	Inverse variance weighted	14	0.0279162	0.0976083	0.774877	0.958193	1.02831	0.849255	1.24512
order.Enterobacteriales.id.3468	Hypertrophic Scar	Inverse variance weighted	14	0.194314	0.121446	0.109598	0.764245	1.21448	0.957221	1.54087
order.Erysipelotrichales.id.2148	Hypertrophic Scar	Inverse variance weighted	9	-0.0863737	0.168258	0.607712	0.947299	0.917251	0.659576	1.27559
order.Gastranaerophilales.id.1591	Hypertrophic Scar	Inverse variance weighted	13	-0.109668	0.158558	0.489153	0.935351	0.896132	0.656757	1.22275
order.Lactobacillales.id.1800	Hypertrophic Scar	Inverse variance weighted	9	-0.283538	0.263518	0.281941	0.892925	0.753115	0.449314	1.26233
order.Methanobacteriales.id.120	Hypertrophic Scar	Inverse variance weighted	16	-0.0492775	0.157713	0.754699	0.957123	0.951917	0.698797	1.29672
order.MollicutesRF9.id.11579	Hypertrophic Scar	Inverse variance weighted	15	-0.0479223	0.12928	0.710871	0.954599	0.953208	0.739848	1.2281
order.NB1n.id.3953	Hypertrophic Scar	Inverse variance weighted	16	-0.0243063	0.168257	0.885138	0.963209	0.975987	0.701811	1.35727
order.Pasteurellales.id.3688	Hypertrophic Scar	Inverse variance weighted	10	-0.243055	0.195593	0.213994	0.863565	0.784229	0.534504	1.15063
order.Rhodospirillales.id.2667	Hypertrophic Scar	Inverse variance weighted	14	-0.00748823	0.181498	0.96709	0.966221	0.99254	0.695431	1.41658
order.Selenomonadales.id.2165	Hypertrophic Scar	Inverse variance weighted	19	-0.130077	0.135545	0.337226	0.908879	0.878028	0.673179	1.14521
order.Verrucomicrobiales.id.4030	Hypertrophic Scar	Inverse variance weighted	11	-0.0502754	0.194019	0.795538	0.959234	0.950967	0.65015	1.39097
order.Victivallales.id.2254	Hypertrophic Scar	Inverse variance weighted	12	0.0787386	0.0917147	0.390607	0.92034	1.08192	0.903913	1.29499
phylum.Actinobacteria.id.400	Hypertrophic Scar	Inverse variance weighted	15	0.175116	0.177632	0.324213	0.894872	1.19138	0.841102	1.68754
phylum.Bacteroidetes.id.905	Hypertrophic Scar	Inverse variance weighted	10	-0.128692	0.21663	0.552472	0.935505	0.879245	0.575057	1.34434
phylum.Cyanobacteria.id.1500	Hypertrophic Scar	Inverse variance weighted	8	-0.242064	0.154885	0.118084	0.756116	0.785006	0.579472	1.06344
phylum.Euryarchaeota.id.55	Hypertrophic Scar	Inverse variance weighted	12	0.0257521	0.100226	0.797225	0.954403	1.02609	0.843082	1.24881
phylum.Firmicutes.id.1672	Hypertrophic Scar	Inverse variance weighted	15	0.0213797	0.200787	0.915202	0.960046	1.02161	0.689242	1.51425
phylum.Lentisphaerae.id.2238	Hypertrophic Scar	Inverse variance weighted	9	-0.0302265	0.127979	0.813291	0.955263	0.970226	0.754978	1.24684
phylum.Proteobacteria.id.2375	Hypertrophic Scar	Inverse variance weighted	12	0.0312228	0.205328	0.879137	0.958475	1.03172	0.689892	1.5429
phylum.Tenericutes.id.3919	Hypertrophic Scar	Inverse variance weighted	12	0.287558	0.159554	0.0715045	0.652458	1.33317	0.975146	1.82264
phylum.Verrucomicrobia.id.3982	Hypertrophic Scar	Inverse variance weighted	12	0.115453	0.159875	0.470206	0.925067	1.12238	0.82045	1.53543

## Sheet: MR Egger
id.exposure	outcome	method	nsnp	b	se	p	OR	OR_lci95	OR_uci95
class.Actinobacteria.id.419	Hypertrophic Scar	MR Egger	15	-0.871204	0.464132	0.0831313	0.418448	0.168486	1.03925
class.Alphaproteobacteria.id.2379	Hypertrophic Scar	MR Egger	7	0.356695	0.697503	0.630855	1.4286	0.364069	5.6058
class.Bacilli.id.1673	Hypertrophic Scar	MR Egger	18	-0.174197	0.505639	0.73495	0.840131	0.311845	2.26337
class.Bacteroidia.id.912	Hypertrophic Scar	MR Egger	12	-0.167356	0.473933	0.731328	0.845899	0.334117	2.1416
class.Betaproteobacteria.id.2867	Hypertrophic Scar	MR Egger	10	-1.28723	0.675118	0.0930072	0.276035	0.0735008	1.03666
class.Clostridia.id.1859	Hypertrophic Scar	MR Egger	12	-0.55677	0.904716	0.552032	0.573057	0.0972945	3.37526
class.Coriobacteriia.id.809	Hypertrophic Scar	MR Egger	14	-0.956105	0.765215	0.235318	0.384387	0.0857838	1.72239
class.Deltaproteobacteria.id.3087	Hypertrophic Scar	MR Egger	13	0.0915492	0.578828	0.877194	1.09587	0.352412	3.40775
class.Erysipelotrichia.id.2147	Hypertrophic Scar	MR Egger	13	0.998388	0.895684	0.288755	2.7139	0.469	15.7042
class.Gammaproteobacteria.id.3303	Hypertrophic Scar	MR Egger	7	-1.0236	0.835509	0.275088	0.359298	0.0698643	1.84779
class.Lentisphaeria.id.2250	Hypertrophic Scar	MR Egger	8	-0.647451	0.498386	0.241596	0.523378	0.197052	1.39011
class.Melainabacteria.id.1589	Hypertrophic Scar	MR Egger	10	0.624045	0.564978	0.301466	1.86646	0.616737	5.64856
class.Methanobacteria.id.119	Hypertrophic Scar	MR Egger	10	-0.643462	0.436084	0.178304	0.52547	0.223535	1.23524
class.Mollicutes.id.3920	Hypertrophic Scar	MR Egger	12	0.467965	0.54391	0.409737	1.59674	0.549857	4.63682
class.Negativicutes.id.2164	Hypertrophic Scar	MR Egger	12	0.412073	0.698986	0.568585	1.50994	0.383683	5.94224
class.Verrucomicrobiae.id.4029	Hypertrophic Scar	MR Egger	11	0.466581	0.667469	0.502197	1.59453	0.430995	5.89923
family.Acidaminococcaceae.id.2166	Hypertrophic Scar	MR Egger	7	0.797631	0.588864	0.23356	2.22027	0.700093	7.04138
family.Actinomycetaceae.id.421	Hypertrophic Scar	MR Egger	4	-0.639098	0.459055	0.29846	0.527768	0.214629	1.29777
family.Alcaligenaceae.id.2875	Hypertrophic Scar	MR Egger	11	-1.86677	0.968218	0.0859409	0.154622	0.0231797	1.03142
family.Bacteroidaceae.id.917	Hypertrophic Scar	MR Egger	9	1.00655	1.16488	0.416169	2.73614	0.278977	26.8354
family.BacteroidalesS24.7group.id.11173	Hypertrophic Scar	MR Egger	8	0.35014	0.760279	0.661346	1.41927	0.319817	6.29834
family.Bifidobacteriaceae.id.433	Hypertrophic Scar	MR Egger	11	-0.399284	0.5562	0.491045	0.6708	0.2255	1.99545
family.Christensenellaceae.id.1866	Hypertrophic Scar	MR Egger	11	0.161612	0.321166	0.626906	1.1754	0.626333	2.20581
family.Clostridiaceae1.id.1869	Hypertrophic Scar	MR Egger	10	-0.0536661	0.56078	0.926113	0.947749	0.315753	2.84471
family.ClostridialesvadinBB60group.id.11286	Hypertrophic Scar	MR Egger	15	-0.5237	0.367117	0.17729	0.592325	0.288446	1.21634
family.Coriobacteriaceae.id.811	Hypertrophic Scar	MR Egger	14	-0.956105	0.765215	0.235318	0.384387	0.0857838	1.72239
family.Defluviitaleaceae.id.1924	Hypertrophic Scar	MR Egger	11	-0.464754	0.551225	0.420998	0.62829	0.213279	1.85085
family.Desulfovibrionaceae.id.3169	Hypertrophic Scar	MR Egger	10	-0.167167	0.443421	0.715981	0.846058	0.354774	2.01766
family.Enterobacteriaceae.id.3469	Hypertrophic Scar	MR Egger	7	0.999542	1.97219	0.633836	2.71704	0.0569291	129.675
family.Erysipelotrichaceae.id.2149	Hypertrophic Scar	MR Egger	13	0.998388	0.895684	0.288755	2.7139	0.469	15.7042
family.FamilyXI.id.1936	Hypertrophic Scar	MR Egger	8	0.620573	0.731713	0.428906	1.85999	0.443267	7.80473
family.FamilyXIII.id.1957	Hypertrophic Scar	MR Egger	10	0.516194	0.638878	0.442468	1.67564	0.479023	5.86143
family.Lachnospiraceae.id.1987	Hypertrophic Scar	MR Egger	16	0.0680271	0.728508	0.926926	1.07039	0.2567	4.46337
family.Lactobacillaceae.id.1836	Hypertrophic Scar	MR Egger	8	0.210944	0.361665	0.580965	1.23484	0.607794	2.50881
family.Methanobacteriaceae.id.121	Hypertrophic Scar	MR Egger	10	-0.643462	0.436084	0.178304	0.52547	0.223535	1.23524
family.Oxalobacteraceae.id.2966	Hypertrophic Scar	MR Egger	14	0.207693	0.376706	0.591518	1.23084	0.588222	2.57548
family.Pasteurellaceae.id.3689	Hypertrophic Scar	MR Egger	14	0.434482	0.263981	0.125707	1.54416	0.920424	2.59059
family.Peptococcaceae.id.2024	Hypertrophic Scar	MR Egger	9	-0.47083	0.468869	0.348733	0.624483	0.249122	1.56542
family.Peptostreptococcaceae.id.2042	Hypertrophic Scar	MR Egger	13	-0.67079	0.362224	0.0910516	0.511304	0.25139	1.03995
family.Porphyromonadaceae.id.943	Hypertrophic Scar	MR Egger	9	-1.98258	1.11447	0.118478	0.137713	0.0154994	1.22359
family.Prevotellaceae.id.960	Hypertrophic Scar	MR Egger	16	-0.300094	0.579633	0.61273	0.740749	0.237836	2.30709
family.Rhodospirillaceae.id.2717	Hypertrophic Scar	MR Egger	15	0.0321874	0.566049	0.955519	1.03271	0.340524	3.13191
family.Rikenellaceae.id.967	Hypertrophic Scar	MR Egger	16	0.415231	0.518798	0.436868	1.51472	0.547927	4.18738
family.Ruminococcaceae.id.2050	Hypertrophic Scar	MR Egger	10	-0.0710696	0.424068	0.871065	0.931397	0.405659	2.1385
family.Streptococcaceae.id.1850	Hypertrophic Scar	MR Egger	14	0.355021	0.739585	0.639839	1.42621	0.334685	6.07759
family.Veillonellaceae.id.2172	Hypertrophic Scar	MR Egger	19	-0.2288	0.275094	0.417098	0.795487	0.463948	1.36395
family.Verrucomicrobiaceae.id.4036	Hypertrophic Scar	MR Egger	11	0.466454	0.667432	0.502287	1.59433	0.430971	5.89805
family.Victivallaceae.id.2255	Hypertrophic Scar	MR Egger	12	0.393024	0.436772	0.389361	1.48145	0.629362	3.48719
genus.Clostridiuminnocuumgroup.id.14397	Hypertrophic Scar	MR Egger	8	0.359224	0.599077	0.570687	1.43222	0.442655	4.63397
genus.Eubacteriumbrachygroup.id.11296	Hypertrophic Scar	MR Egger	10	-0.849844	0.434657	0.086295	0.427482	0.18236	1.00209
genus.Eubacteriumcoprostanoligenesgroup.id.11375	Hypertrophic Scar	MR Egger	13	-0.747354	0.785005	0.36153	0.473618	0.101676	2.20617
genus.Eubacteriumeligensgroup.id.14372	Hypertrophic Scar	MR Egger	7	-0.624542	1.03498	0.572547	0.535506	0.0704321	4.07154
genus.Eubacteriumfissicatenagroup.id.14373	Hypertrophic Scar	MR Egger	9	0.670873	0.60156	0.301572	1.95594	0.601587	6.35938
genus.Eubacteriumhalliigroup.id.11338	Hypertrophic Scar	MR Egger	14	-0.561378	0.352734	0.13748	0.570422	0.285722	1.1388
genus.Eubacteriumnodatumgroup.id.11297	Hypertrophic Scar	MR Egger	11	-0.021866	0.420749	0.959688	0.978371	0.428899	2.23178
genus.Eubacteriumoxidoreducensgroup.id.11339	Hypertrophic Scar	MR Egger	5	-0.239332	0.643971	0.734851	0.787153	0.222792	2.78111
genus.Eubacteriumrectalegroup.id.14374	Hypertrophic Scar	MR Egger	8	-1.09482	0.869779	0.254885	0.3346	0.0608351	1.84033
genus.Eubacteriumruminantiumgroup.id.11340	Hypertrophic Scar	MR Egger	18	-0.141031	0.403785	0.731439	0.868462	0.393588	1.91628
genus.Eubacteriumventriosumgroup.id.11341	Hypertrophic Scar	MR Egger	15	-0.138035	0.749199	0.856666	0.871068	0.200595	3.78254
genus.Eubacteriumxylanophilumgroup.id.14375	Hypertrophic Scar	MR Egger	9	-0.0298246	0.549086	0.958201	0.970616	0.330869	2.84734
genus.Ruminococcusgauvreauiigroup.id.11342	Hypertrophic Scar	MR Egger	12	-0.481909	0.709354	0.512326	0.617604	0.153778	2.48042
genus.Ruminococcusgnavusgroup.id.14376	Hypertrophic Scar	MR Egger	11	-1.25793	0.605912	0.067692	0.284241	0.0866811	0.932072
genus.Ruminococcustorquesgroup.id.14377	Hypertrophic Scar	MR Egger	9	0.744123	0.802665	0.384742	2.10459	0.436442	10.1487
genus.Actinomyces.id.423	Hypertrophic Scar	MR Egger	7	-0.374235	0.396341	0.38841	0.687815	0.3163	1.4957
genus.Adlercreutzia.id.812	Hypertrophic Scar	MR Egger	8	1.14897	0.781199	0.191758	3.15493	0.68237	14.5868
genus.Akkermansia.id.4037	Hypertrophic Scar	MR Egger	11	0.464346	0.667163	0.504004	1.59097	0.430291	5.88253
genus.Alistipes.id.968	Hypertrophic Scar	MR Egger	13	0.00716771	1.01052	0.994468	1.00719	0.138976	7.2994
genus.Allisonella.id.2174	Hypertrophic Scar	MR Egger	8	0.716853	0.69924	0.344818	2.04798	0.52014	8.06362
genus.Alloprevotella.id.961	Hypertrophic Scar	MR Egger	5	0.666429	1.13786	0.599232	1.94727	0.209344	18.1131
genus.Anaerofilum.id.2053	Hypertrophic Scar	MR Egger	10	0.605433	0.863559	0.503126	1.83205	0.337179	9.95434
genus.Anaerostipes.id.1991	Hypertrophic Scar	MR Egger	13	2.18922	0.864287	0.0278253	8.92829	1.64086	48.5807
genus.Anaerotruncus.id.2054	Hypertrophic Scar	MR Egger	13	-0.154335	0.54696	0.783052	0.856985	0.293354	2.50354
genus.Bacteroides.id.918	Hypertrophic Scar	MR Egger	9	1.00655	1.16488	0.416169	2.73614	0.278977	26.8354
genus.Barnesiella.id.944	Hypertrophic Scar	MR Egger	13	-0.81733	0.714393	0.276872	0.441609	0.108877	1.79119
genus.Bifidobacterium.id.436	Hypertrophic Scar	MR Egger	12	-0.484259	0.386138	0.238325	0.616154	0.289069	1.31334
genus.Bilophila.id.3170	Hypertrophic Scar	MR Egger	13	0.00260811	0.866473	0.997652	1.00261	0.183475	5.47885
genus.Blautia.id.1992	Hypertrophic Scar	MR Egger	13	0.680169	0.577485	0.263725	1.97421	0.636544	6.12293
genus.Butyricicoccus.id.2055	Hypertrophic Scar	MR Egger	8	-0.196529	0.444581	0.673938	0.821577	0.343727	1.96374
genus.Butyricimonas.id.945	Hypertrophic Scar	MR Egger	13	-0.0894449	0.586413	0.881532	0.914439	0.289727	2.88615
genus.Butyrivibrio.id.1993	Hypertrophic Scar	MR Egger	15	0.709522	0.337322	0.0554691	2.03302	1.04956	3.938
genus.CandidatusSoleaferrea.id.11350	Hypertrophic Scar	MR Egger	9	1.84285	1.75786	0.329321	6.31449	0.201379	197.999
genus.Catenibacterium.id.2153	Hypertrophic Scar	MR Egger	4	-1.16249	1.95187	0.611877	0.312706	0.0068182	14.3418
genus.ChristensenellaceaeR.7group.id.11283	Hypertrophic Scar	MR Egger	9	-0.0925402	1.05322	0.932446	0.911613	0.115689	7.1834
genus.Clostridiumsensustricto1.id.1873	Hypertrophic Scar	MR Egger	7	0.673908	0.516371	0.248694	1.96189	0.713068	5.39782
genus.Collinsella.id.815	Hypertrophic Scar	MR Egger	9	-0.6669	0.852169	0.459518	0.513298	0.0966025	2.72741
genus.Coprobacter.id.949	Hypertrophic Scar	MR Egger	11	-0.0709949	0.514238	0.893234	0.931467	0.339969	2.55209
genus.Coprococcus1.id.11301	Hypertrophic Scar	MR Egger	12	0.0169135	0.51601	0.974497	1.01706	0.369921	2.79629
genus.Coprococcus2.id.11302	Hypertrophic Scar	MR Egger	8	1.85853	1.96426	0.380589	6.41429	0.136502	301.411
genus.Coprococcus3.id.11303	Hypertrophic Scar	MR Egger	9	-0.0600994	1.3059	0.964579	0.941671	0.0728269	12.1761
genus.DefluviitaleaceaeUCG011.id.11287	Hypertrophic Scar	MR Egger	9	-0.42077	0.605727	0.509665	0.656541	0.200289	2.15212
genus.Desulfovibrio.id.3173	Hypertrophic Scar	MR Egger	10	0.549092	0.483503	0.288977	1.73168	0.671276	4.46718
genus.Dialister.id.2183	Hypertrophic Scar	MR Egger	10	-0.852136	0.724614	0.273408	0.426503	0.103067	1.76493
genus.Dorea.id.1997	Hypertrophic Scar	MR Egger	10	0.988181	0.818238	0.261654	2.68634	0.540335	13.3555
genus.Eggerthella.id.819	Hypertrophic Scar	MR Egger	10	0.297917	0.621044	0.644279	1.34705	0.398786	4.55016
genus.Eisenbergiella.id.11304	Hypertrophic Scar	MR Egger	11	-0.102153	0.887015	0.910843	0.902891	0.158706	5.13663
genus.Enterorhabdus.id.820	Hypertrophic Scar	MR Egger	6	-0.0577973	0.595746	0.92738	0.943841	0.293623	3.03395
genus.Erysipelatoclostridium.id.11381	Hypertrophic Scar	MR Egger	15	-0.915856	0.545797	0.117207	0.400174	0.137296	1.16638
genus.ErysipelotrichaceaeUCG003.id.11384	Hypertrophic Scar	MR Egger	16	-0.624543	0.41567	0.155186	0.535506	0.237104	1.20946
genus.Escherichia.Shigella.id.3504	Hypertrophic Scar	MR Egger	10	0.727284	0.605888	0.264334	2.06945	0.631122	6.78575
genus.Faecalibacterium.id.2057	Hypertrophic Scar	MR Egger	10	-0.672132	0.334547	0.0793915	0.510619	0.265048	0.983715
genus.FamilyXIIIAD3011group.id.11293	Hypertrophic Scar	MR Egger	13	-0.856722	0.827021	0.32248	0.424552	0.0839375	2.14736
genus.FamilyXIIIUCG001.id.11294	Hypertrophic Scar	MR Egger	8	0.0304322	0.638013	0.963505	1.0309	0.295209	3.60001
genus.Flavonifractor.id.2059	Hypertrophic Scar	MR Egger	5	-1.08833	0.956936	0.338028	0.33678	0.0516161	2.19738
genus.Fusicatenibacter.id.11305	Hypertrophic Scar	MR Egger	18	0.525178	0.686994	0.455722	1.69076	0.439846	6.49924
genus.Gordonibacter.id.821	Hypertrophic Scar	MR Egger	11	0.666036	0.414633	0.142665	1.94651	0.8636	4.38731
genus.Haemophilus.id.3698	Hypertrophic Scar	MR Egger	9	0.403481	0.326713	0.256683	1.49703	0.789088	2.8401
genus.Holdemanella.id.11393	Hypertrophic Scar	MR Egger	11	0.406728	0.360201	0.288023	1.5019	0.741362	3.04263
genus.Holdemania.id.2157	Hypertrophic Scar	MR Egger	15	0.394192	0.426235	0.371907	1.48319	0.643246	3.4199
genus.Howardella.id.2000	Hypertrophic Scar	MR Egger	10	-0.389003	0.393613	0.351955	0.677732	0.313335	1.46591
genus.Hungatella.id.11306	Hypertrophic Scar	MR Egger	5	-0.58023	0.940775	0.58104	0.55977	0.0885534	3.53845
genus.Intestinibacter.id.11345	Hypertrophic Scar	MR Egger	14	0.899705	0.501382	0.0979535	2.45888	0.920348	6.56934
genus.Intestinimonas.id.2062	Hypertrophic Scar	MR Egger	16	0.377347	0.391455	0.351422	1.45841	0.677121	3.14118
genus.Lachnoclostridium.id.11308	Hypertrophic Scar	MR Egger	13	0.704078	0.647802	0.300336	2.02198	0.568012	7.19776
genus.Lachnospira.id.2004	Hypertrophic Scar	MR Egger	6	-1.7082	1.74166	0.382229	0.181191	0.00596492	5.5039
genus.LachnospiraceaeFCS020group.id.11314	Hypertrophic Scar	MR Egger	12	0.816853	0.45431	0.102384	2.26337	0.929048	5.51405
genus.LachnospiraceaeNC2004group.id.11316	Hypertrophic Scar	MR Egger	9	-0.453531	0.619832	0.488119	0.635381	0.188548	2.14115
genus.LachnospiraceaeND3007group.id.11317	Hypertrophic Scar	MR Egger	3	0.375238	6.66798	0.964212	1.45534	3.07e-06	690028
genus.LachnospiraceaeNK4A136group.id.11319	Hypertrophic Scar	MR Egger	15	-0.327696	0.31137	0.311771	0.720582	0.391417	1.32656
genus.LachnospiraceaeUCG001.id.11321	Hypertrophic Scar	MR Egger	13	0.302486	0.606018	0.627515	1.35322	0.412587	4.43834
genus.LachnospiraceaeUCG004.id.11324	Hypertrophic Scar	MR Egger	12	-0.662893	0.7926	0.422492	0.515358	0.109002	2.4366
genus.LachnospiraceaeUCG008.id.11328	Hypertrophic Scar	MR Egger	10	1.02318	0.717309	0.191583	2.78204	0.68199	11.3488
genus.LachnospiraceaeUCG010.id.11330	Hypertrophic Scar	MR Egger	10	0.447313	0.62798	0.496522	1.5641	0.456791	5.35566
genus.Lactobacillus.id.1837	Hypertrophic Scar	MR Egger	8	0.145039	0.346146	0.689795	1.15608	0.586602	2.27843
genus.Lactococcus.id.1851	Hypertrophic Scar	MR Egger	9	0.373207	0.779287	0.646602	1.45239	0.315311	6.68998
genus.Marvinbryantia.id.2005	Hypertrophic Scar	MR Egger	10	0.950801	0.743785	0.236972	2.58778	0.602289	11.1186
genus.Methanobrevibacter.id.123	Hypertrophic Scar	MR Egger	6	-0.0243715	0.5317	0.965637	0.975923	0.34421	2.76699
genus.Odoribacter.id.952	Hypertrophic Scar	MR Egger	7	-0.960814	0.731823	0.246241	0.382582	0.0911556	1.6057
genus.Olsenella.id.822	Hypertrophic Scar	MR Egger	11	0.146013	0.316936	0.655943	1.15721	0.621772	2.15374
genus.Oscillibacter.id.2063	Hypertrophic Scar	MR Egger	13	0.522803	0.570687	0.379263	1.68675	0.551153	5.16213
genus.Oscillospira.id.2064	Hypertrophic Scar	MR Egger	8	0.499326	0.780774	0.546107	1.64761	0.356653	7.61137
genus.Oxalobacter.id.2978	Hypertrophic Scar	MR Egger	11	0.619481	0.487112	0.235343	1.85796	0.715154	4.82697
genus.Parabacteroides.id.954	Hypertrophic Scar	MR Egger	5	3.55043	1.8129	0.145075	34.8282	0.997148	1216.47
genus.Paraprevotella.id.962	Hypertrophic Scar	MR Egger	13	0.0420087	0.458545	0.928652	1.0429	0.424544	2.56192
genus.Parasutterella.id.2892	Hypertrophic Scar	MR Egger	14	0.45817	0.380765	0.252067	1.58118	0.749665	3.33499
genus.Peptococcus.id.2037	Hypertrophic Scar	MR Egger	12	0.271266	0.545632	0.629826	1.31162	0.45015	3.82174
genus.Phascolarctobacterium.id.2168	Hypertrophic Scar	MR Egger	9	-0.16059	0.869564	0.858717	0.851641	0.154906	4.68214
genus.Prevotella7.id.11182	Hypertrophic Scar	MR Egger	11	0.0171006	0.568119	0.976644	1.01725	0.334068	3.09756
genus.Prevotella9.id.11183	Hypertrophic Scar	MR Egger	15	-0.547791	0.366066	0.158422	0.578225	0.28216	1.18495
genus.RikenellaceaeRC9gutgroup.id.11191	Hypertrophic Scar	MR Egger	11	-0.357758	0.709405	0.62616	0.699242	0.174088	2.80857
genus.Romboutsia.id.11347	Hypertrophic Scar	MR Egger	13	0.450442	0.683042	0.523165	1.569	0.411346	5.98469
genus.Roseburia.id.2012	Hypertrophic Scar	MR Egger	14	-0.550484	0.631449	0.400436	0.576671	0.167274	1.98806
genus.Ruminiclostridium5.id.11355	Hypertrophic Scar	MR Egger	10	-1.17629	0.897084	0.22616	0.308421	0.0531534	1.78961
genus.Ruminiclostridium6.id.11356	Hypertrophic Scar	MR Egger	16	-0.0417101	0.451724	0.92774	0.959148	0.395704	2.32488
genus.Ruminiclostridium9.id.11357	Hypertrophic Scar	MR Egger	9	-0.582726	1.1689	0.633393	0.558374	0.056486	5.51962
genus.RuminococcaceaeNK4A214group.id.11358	Hypertrophic Scar	MR Egger	13	-0.601281	0.582334	0.323989	0.548109	0.175055	1.71617
genus.RuminococcaceaeUCG002.id.11360	Hypertrophic Scar	MR Egger	21	-0.589895	0.353054	0.111145	0.554386	0.277515	1.10748
genus.RuminococcaceaeUCG003.id.11361	Hypertrophic Scar	MR Egger	12	0.757386	0.564589	0.209433	2.13269	0.705246	6.44936
genus.RuminococcaceaeUCG004.id.11362	Hypertrophic Scar	MR Egger	11	0.598619	0.938963	0.539657	1.8196	0.288879	11.4614
genus.RuminococcaceaeUCG005.id.11363	Hypertrophic Scar	MR Egger	14	-0.467036	0.633361	0.475055	0.626857	0.181151	2.16918
genus.RuminococcaceaeUCG009.id.11366	Hypertrophic Scar	MR Egger	11	-0.087684	0.626819	0.89183	0.91605	0.268139	3.12952
genus.RuminococcaceaeUCG010.id.11367	Hypertrophic Scar	MR Egger	6	0.31275	0.617321	0.639068	1.36718	0.40771	4.58458
genus.RuminococcaceaeUCG011.id.11368	Hypertrophic Scar	MR Egger	8	1.62897	0.600495	0.0349794	5.09864	1.57146	16.5427
genus.RuminococcaceaeUCG013.id.11370	Hypertrophic Scar	MR Egger	11	0.811369	0.555555	0.178173	2.25099	0.757661	6.68762
genus.RuminococcaceaeUCG014.id.11371	Hypertrophic Scar	MR Egger	11	-0.123666	0.450331	0.789814	0.883675	0.365564	2.1361
genus.Ruminococcus1.id.11373	Hypertrophic Scar	MR Egger	10	0.0816822	0.679712	0.90731	1.08511	0.286346	4.11203
genus.Ruminococcus2.id.11374	Hypertrophic Scar	MR Egger	15	-0.277684	0.357343	0.451021	0.757536	0.376034	1.52609
genus.Sellimonas.id.14369	Hypertrophic Scar	MR Egger	9	0.273342	0.633669	0.679177	1.31435	0.379595	4.55094
genus.Senegalimassilia.id.11160	Hypertrophic Scar	MR Egger	5	0.68146	0.820442	0.467124	1.97676	0.395895	9.87026
genus.Slackia.id.825	Hypertrophic Scar	MR Egger	6	0.402406	1.35051	0.780565	1.49542	0.105971	21.1027
genus.Streptococcus.id.1853	Hypertrophic Scar	MR Egger	15	-0.348988	0.645666	0.597986	0.705402	0.198991	2.50057
genus.Subdoligranulum.id.2070	Hypertrophic Scar	MR Egger	11	0.334051	0.498357	0.519491	1.39661	0.525855	3.70926
genus.Sutterella.id.2896	Hypertrophic Scar	MR Egger	12	-0.926612	0.754388	0.24746	0.395893	0.0902463	1.7367
genus.Terrisporobacter.id.11348	Hypertrophic Scar	MR Egger	5	-0.346042	0.611411	0.610982	0.707483	0.213438	2.34509
genus.Turicibacter.id.2162	Hypertrophic Scar	MR Egger	10	0.636124	0.675785	0.374096	1.88914	0.502372	7.10403
genus.Tyzzerella3.id.11335	Hypertrophic Scar	MR Egger	13	0.588052	0.627689	0.368948	1.80048	0.526124	6.16151
genus.Veillonella.id.2198	Hypertrophic Scar	MR Egger	6	5.08684	1.60883	0.0341241	161.878	6.91393	3790.11
genus.Victivallis.id.2256	Hypertrophic Scar	MR Egger	10	0.126388	0.992429	0.901804	1.13472	0.162225	7.93711
order.Actinomycetales.id.420	Hypertrophic Scar	MR Egger	4	-0.640906	0.460105	0.298268	0.526815	0.213801	1.2981
order.Bacillales.id.1674	Hypertrophic Scar	MR Egger	8	0.0623252	0.424988	0.88821	1.06431	0.462712	2.44807
order.Bacteroidales.id.913	Hypertrophic Scar	MR Egger	12	-0.167356	0.473933	0.731328	0.845899	0.334117	2.1416
order.Bifidobacteriales.id.432	Hypertrophic Scar	MR Egger	11	-0.399284	0.5562	0.491045	0.6708	0.2255	1.99545
order.Burkholderiales.id.2874	Hypertrophic Scar	MR Egger	10	-1.33942	0.663859	0.0783466	0.261998	0.0713196	0.962468
order.Clostridiales.id.1863	Hypertrophic Scar	MR Egger	13	-0.440921	0.859255	0.617999	0.643443	0.119426	3.46675
order.Coriobacteriales.id.810	Hypertrophic Scar	MR Egger	14	-0.956105	0.765215	0.235318	0.384387	0.0857838	1.72239
order.Desulfovibrionales.id.3156	Hypertrophic Scar	MR Egger	12	0.0760365	0.563522	0.895344	1.079	0.357555	3.25613
order.Enterobacteriales.id.3468	Hypertrophic Scar	MR Egger	7	0.999542	1.97219	0.633836	2.71704	0.0569291	129.675
order.Erysipelotrichales.id.2148	Hypertrophic Scar	MR Egger	13	0.998388	0.895684	0.288755	2.7139	0.469	15.7042
order.Gastranaerophilales.id.1591	Hypertrophic Scar	MR Egger	9	0.928793	0.48795	0.0987026	2.53145	0.972788	6.58751
order.Lactobacillales.id.1800	Hypertrophic Scar	MR Egger	15	-0.186108	0.45503	0.689196	0.830184	0.340286	2.02537
order.Methanobacteriales.id.120	Hypertrophic Scar	MR Egger	10	-0.643462	0.436084	0.178304	0.52547	0.223535	1.23524
order.MollicutesRF9.id.11579	Hypertrophic Scar	MR Egger	13	0.359032	0.48443	0.474131	1.43194	0.554078	3.70067
order.NB1n.id.3953	Hypertrophic Scar	MR Egger	12	0.246237	0.601652	0.690971	1.2792	0.393371	4.15983
order.Pasteurellales.id.3688	Hypertrophic Scar	MR Egger	14	0.434482	0.263981	0.125707	1.54416	0.920424	2.59059
order.Rhodospirillales.id.2667	Hypertrophic Scar	MR Egger	14	-0.0661974	0.501524	0.897178	0.935946	0.350223	2.50125
order.Selenomonadales.id.2165	Hypertrophic Scar	MR Egger	12	0.412073	0.698986	0.568585	1.50994	0.383683	5.94224
order.Verrucomicrobiales.id.4030	Hypertrophic Scar	MR Egger	11	0.466581	0.667469	0.502197	1.59453	0.430995	5.89923
order.Victivallales.id.2254	Hypertrophic Scar	MR Egger	8	-0.647451	0.498386	0.241596	0.523378	0.197052	1.39011
phylum.Actinobacteria.id.400	Hypertrophic Scar	MR Egger	15	-0.573771	0.753354	0.45988	0.563397	0.12869	2.46651
phylum.Bacteroidetes.id.905	Hypertrophic Scar	MR Egger	10	0.0018328	0.47692	0.997028	1.00183	0.393399	2.55128
phylum.Cyanobacteria.id.1500	Hypertrophic Scar	MR Egger	8	0.173961	0.55355	0.76396	1.19001	0.402124	3.52161
phylum.Euryarchaeota.id.55	Hypertrophic Scar	MR Egger	12	-0.399266	0.445241	0.390933	0.670812	0.280288	1.60545
phylum.Firmicutes.id.1672	Hypertrophic Scar	MR Egger	15	-0.462781	0.536628	0.404103	0.629531	0.219903	1.8022
phylum.Lentisphaerae.id.2238	Hypertrophic Scar	MR Egger	9	-0.605399	0.470836	0.239412	0.545857	0.216918	1.37361
phylum.Proteobacteria.id.2375	Hypertrophic Scar	MR Egger	12	0.105012	0.596927	0.863868	1.11072	0.34474	3.57866
phylum.Tenericutes.id.3919	Hypertrophic Scar	MR Egger	12	0.467965	0.54391	0.409737	1.59674	0.549857	4.63682
phylum.Verrucomicrobia.id.3982	Hypertrophic Scar	MR Egger	12	0.40627	0.419647	0.355814	1.50121	0.659523	3.41705

## Sheet: Simple Mode
id.exposure	outcome	method	nsnp	b	se	p	OR	OR_lci95	OR_uci95
class.Actinobacteria.id.419	Hypertrophic Scar	Simple mode	15	0.560308	0.476032	0.258804	1.75121	0.688862	4.4519
class.Alphaproteobacteria.id.2379	Hypertrophic Scar	Simple mode	7	0.271078	0.334437	0.448572	1.31138	0.680846	2.52584
class.Bacilli.id.1673	Hypertrophic Scar	Simple mode	18	-0.366471	0.403876	0.376886	0.693176	0.314092	1.52978
class.Bacteroidia.id.912	Hypertrophic Scar	Simple mode	12	-0.434948	0.492424	0.395979	0.647298	0.246572	1.69928
class.Betaproteobacteria.id.2867	Hypertrophic Scar	Simple mode	10	-0.124323	0.450201	0.78867	0.883095	0.365417	2.13416
class.Clostridia.id.1859	Hypertrophic Scar	Simple mode	12	-0.632538	0.472137	0.207352	0.531242	0.210572	1.34024
class.Coriobacteriia.id.809	Hypertrophic Scar	Simple mode	14	-0.475955	0.453755	0.313323	0.621292	0.255301	1.51196
class.Deltaproteobacteria.id.3087	Hypertrophic Scar	Simple mode	13	0.753723	0.427585	0.103369	2.1249	0.919115	4.91254
class.Erysipelotrichia.id.2147	Hypertrophic Scar	Simple mode	13	0.481258	0.485488	0.341113	1.61811	0.624816	4.19047
class.Gammaproteobacteria.id.3303	Hypertrophic Scar	Simple mode	7	-0.151795	0.4746	0.759936	0.859164	0.338913	2.17803
class.Lentisphaeria.id.2250	Hypertrophic Scar	Simple mode	8	-0.230306	0.265429	0.414326	0.794291	0.472108	1.33634
class.Melainabacteria.id.1589	Hypertrophic Scar	Simple mode	10	0.452362	0.31715	0.187526	1.57202	0.844295	2.927
class.Methanobacteria.id.119	Hypertrophic Scar	Simple mode	10	-0.0655254	0.212932	0.765291	0.936575	0.617009	1.42165
class.Mollicutes.id.3920	Hypertrophic Scar	Simple mode	12	0.426647	0.367805	0.270614	1.53211	0.74509	3.15045
class.Negativicutes.id.2164	Hypertrophic Scar	Simple mode	12	-0.0347216	0.48236	0.943908	0.965874	0.375256	2.48607
class.Verrucomicrobiae.id.4029	Hypertrophic Scar	Simple mode	11	0.309994	0.402405	0.458903	1.36342	0.619576	3.00028
family.Acidaminococcaceae.id.2166	Hypertrophic Scar	Simple mode	7	-0.0390734	0.359609	0.917019	0.96168	0.475253	1.94597
family.Actinomycetaceae.id.421	Hypertrophic Scar	Simple mode	4	0.0891659	0.367769	0.824061	1.09326	0.531708	2.24789
family.Alcaligenaceae.id.2875	Hypertrophic Scar	Simple mode	11	0.363818	0.523854	0.503182	1.43881	0.515337	4.01714
family.Bacteroidaceae.id.917	Hypertrophic Scar	Simple mode	9	-0.318719	0.458541	0.506694	0.72708	0.295981	1.78608
family.BacteroidalesS24.7group.id.11173	Hypertrophic Scar	Simple mode	8	-0.156913	0.354534	0.671415	0.854778	0.426647	1.71253
family.Bifidobacteriaceae.id.433	Hypertrophic Scar	Simple mode	11	-0.260264	0.336967	0.45776	0.770848	0.398233	1.49211
family.Christensenellaceae.id.1866	Hypertrophic Scar	Simple mode	11	-0.256388	0.316285	0.436449	0.773842	0.416318	1.4384
family.Clostridiaceae1.id.1869	Hypertrophic Scar	Simple mode	10	-0.15153	0.433202	0.734542	0.859392	0.367656	2.00882
family.ClostridialesvadinBB60group.id.11286	Hypertrophic Scar	Simple mode	15	-0.191845	0.267351	0.48482	0.825435	0.488775	1.39398
family.Coriobacteriaceae.id.811	Hypertrophic Scar	Simple mode	14	-0.475955	0.464589	0.324303	0.621292	0.249936	1.54441
family.Defluviitaleaceae.id.1924	Hypertrophic Scar	Simple mode	11	0.017289	0.377884	0.964409	1.01744	0.485117	2.13388
family.Desulfovibrionaceae.id.3169	Hypertrophic Scar	Simple mode	10	0.93986	0.501065	0.0934416	2.55962	0.958652	6.83425
family.Enterobacteriaceae.id.3469	Hypertrophic Scar	Simple mode	7	-0.220278	0.398776	0.60064	0.802295	0.367189	1.75299
family.Erysipelotrichaceae.id.2149	Hypertrophic Scar	Simple mode	13	0.481258	0.482082	0.337844	1.61811	0.629001	4.1626
family.FamilyXI.id.1936	Hypertrophic Scar	Simple mode	8	-0.229119	0.266884	0.419042	0.795234	0.471323	1.34175
family.FamilyXIII.id.1957	Hypertrophic Scar	Simple mode	10	-0.164426	0.407437	0.695954	0.84838	0.381745	1.88542
family.Lachnospiraceae.id.1987	Hypertrophic Scar	Simple mode	16	0.163966	0.534362	0.76318	1.17817	0.413382	3.3579
family.Lactobacillaceae.id.1836	Hypertrophic Scar	Simple mode	8	-0.0662708	0.293449	0.827783	0.935877	0.526538	1.66344
family.Methanobacteriaceae.id.121	Hypertrophic Scar	Simple mode	10	-0.0655254	0.217987	0.770553	0.936575	0.610925	1.43581
family.Oxalobacteraceae.id.2966	Hypertrophic Scar	Simple mode	14	0.188157	0.240407	0.44785	1.20702	0.753489	1.93354
family.Pasteurellaceae.id.3689	Hypertrophic Scar	Simple mode	14	0.207603	0.269463	0.454817	1.23072	0.725754	2.08705
family.Peptococcaceae.id.2024	Hypertrophic Scar	Simple mode	9	0.11036	0.354306	0.763396	1.11668	0.557619	2.23625
family.Peptostreptococcaceae.id.2042	Hypertrophic Scar	Simple mode	13	-0.15637	0.307738	0.620575	0.855243	0.467883	1.5633
family.Porphyromonadaceae.id.943	Hypertrophic Scar	Simple mode	9	0.323074	0.588383	0.597932	1.38137	0.435981	4.37674
family.Prevotellaceae.id.960	Hypertrophic Scar	Simple mode	16	-0.194709	0.376416	0.61251	0.823074	0.393574	1.72128
family.Rhodospirillaceae.id.2717	Hypertrophic Scar	Simple mode	15	0.0150944	0.309426	0.961782	1.01521	0.553562	1.86185
family.Rikenellaceae.id.967	Hypertrophic Scar	Simple mode	16	0.21573	0.411949	0.608152	1.24077	0.55339	2.78195
family.Ruminococcaceae.id.2050	Hypertrophic Scar	Simple mode	10	-0.477407	0.376452	0.236558	0.62039	0.296635	1.2975
family.Streptococcaceae.id.1850	Hypertrophic Scar	Simple mode	14	-0.052891	0.360467	0.885597	0.948483	0.467944	1.9225
family.Veillonellaceae.id.2172	Hypertrophic Scar	Simple mode	19	0.0939767	0.324014	0.775101	1.09853	0.582113	2.0731
family.Verrucomicrobiaceae.id.4036	Hypertrophic Scar	Simple mode	11	0.310454	0.364827	0.414702	1.36404	0.667239	2.78853
family.Victivallaceae.id.2255	Hypertrophic Scar	Simple mode	12	0.17604	0.213064	0.426232	1.19249	0.785397	1.81058
genus.Clostridiuminnocuumgroup.id.14397	Hypertrophic Scar	Simple mode	8	0.089175	0.228845	0.708362	1.09327	0.698122	1.71209
genus.Eubacteriumbrachygroup.id.11296	Hypertrophic Scar	Simple mode	10	0.0620653	0.27747	0.827999	1.06403	0.617686	1.83291
genus.Eubacteriumcoprostanoligenesgroup.id.11375	Hypertrophic Scar	Simple mode	13	-0.674583	0.422759	0.136547	0.509369	0.222419	1.16652
genus.Eubacteriumeligensgroup.id.14372	Hypertrophic Scar	Simple mode	7	-0.147289	0.538638	0.793679	0.863045	0.300286	2.48045
genus.Eubacteriumfissicatenagroup.id.14373	Hypertrophic Scar	Simple mode	9	0.2976	0.23219	0.235841	1.34662	0.854283	2.12271
genus.Eubacteriumhalliigroup.id.11338	Hypertrophic Scar	Simple mode	14	0.572222	0.503152	0.275951	1.7722	0.661031	4.75121
genus.Eubacteriumnodatumgroup.id.11297	Hypertrophic Scar	Simple mode	11	0.121911	0.18698	0.5291	1.12965	0.783042	1.62969
genus.Eubacteriumoxidoreducensgroup.id.11339	Hypertrophic Scar	Simple mode	5	-0.0609276	0.274068	0.834963	0.940891	0.549855	1.61002
genus.Eubacteriumrectalegroup.id.14374	Hypertrophic Scar	Simple mode	8	0.250328	0.523719	0.64723	1.28445	0.460169	3.58521
genus.Eubacteriumruminantiumgroup.id.11340	Hypertrophic Scar	Simple mode	18	-0.107013	0.235128	0.654776	0.898514	0.566734	1.42452
genus.Eubacteriumventriosumgroup.id.11341	Hypertrophic Scar	Simple mode	15	0.145639	0.374979	0.703567	1.15678	0.554705	2.41234
genus.Eubacteriumxylanophilumgroup.id.14375	Hypertrophic Scar	Simple mode	9	-0.279848	0.366993	0.467621	0.755899	0.368191	1.55187
genus.Ruminococcusgauvreauiigroup.id.11342	Hypertrophic Scar	Simple mode	12	-0.0632981	0.375705	0.869265	0.938664	0.449473	1.96027
genus.Ruminococcusgnavusgroup.id.14376	Hypertrophic Scar	Simple mode	11	0.360301	0.288714	0.240479	1.43376	0.814176	2.52485
genus.Ruminococcustorquesgroup.id.14377	Hypertrophic Scar	Simple mode	9	0.112653	0.525289	0.835554	1.11924	0.399751	3.13372
genus.Actinomyces.id.423	Hypertrophic Scar	Simple mode	7	0.181851	0.36819	0.63893	1.19944	0.582865	2.46823
genus.Adlercreutzia.id.812	Hypertrophic Scar	Simple mode	8	0.463454	0.332866	0.206456	1.58956	0.827818	3.05222
genus.Akkermansia.id.4037	Hypertrophic Scar	Simple mode	11	0.303416	0.383165	0.446814	1.35448	0.639169	2.87031
genus.Alistipes.id.968	Hypertrophic Scar	Simple mode	13	0.214498	0.422346	0.620749	1.23924	0.54156	2.83572
genus.Allisonella.id.2174	Hypertrophic Scar	Simple mode	8	-0.199386	0.246704	0.445569	0.819234	0.505137	1.32864
genus.Alloprevotella.id.961	Hypertrophic Scar	Simple mode	5	-0.206952	0.241406	0.439618	0.813059	0.506563	1.305
genus.Anaerofilum.id.2053	Hypertrophic Scar	Simple mode	10	0.364274	0.272355	0.213876	1.43947	0.844051	2.45491
genus.Anaerostipes.id.1991	Hypertrophic Scar	Simple mode	13	-0.0441959	0.434636	0.920686	0.956766	0.408166	2.24272
genus.Anaerotruncus.id.2054	Hypertrophic Scar	Simple mode	13	-0.731647	0.417662	0.105305	0.481116	0.212192	1.09087
genus.Bacteroides.id.918	Hypertrophic Scar	Simple mode	9	-0.318719	0.483513	0.528299	0.72708	0.281843	1.87567
genus.Barnesiella.id.944	Hypertrophic Scar	Simple mode	13	0.318402	0.388352	0.428269	1.37493	0.642256	2.94342
genus.Bifidobacterium.id.436	Hypertrophic Scar	Simple mode	12	0.251609	0.3775	0.518818	1.28609	0.613675	2.6953
genus.Bilophila.id.3170	Hypertrophic Scar	Simple mode	13	-0.345044	0.385491	0.388347	0.708189	0.332669	1.5076
genus.Blautia.id.1992	Hypertrophic Scar	Simple mode	13	0.162009	0.446851	0.72324	1.17587	0.489771	2.8231
genus.Butyricicoccus.id.2055	Hypertrophic Scar	Simple mode	8	0.624475	0.566651	0.306885	1.86726	0.614983	5.66956
genus.Butyricimonas.id.945	Hypertrophic Scar	Simple mode	13	-0.0884867	0.403959	0.830293	0.915315	0.414681	2.02035
genus.Butyrivibrio.id.1993	Hypertrophic Scar	Simple mode	15	-0.118029	0.199127	0.562812	0.88867	0.601506	1.31293
genus.CandidatusSoleaferrea.id.11350	Hypertrophic Scar	Simple mode	9	0.351812	0.316084	0.298017	1.42164	0.765128	2.64147
genus.Catenibacterium.id.2153	Hypertrophic Scar	Simple mode	4	-0.0249445	0.267832	0.931668	0.975364	0.57701	1.64873
genus.ChristensenellaceaeR.7group.id.11283	Hypertrophic Scar	Simple mode	9	0.0928725	0.625173	0.885581	1.09732	0.322237	3.73673
genus.Clostridiumsensustricto1.id.1873	Hypertrophic Scar	Simple mode	7	-0.0433445	0.412093	0.91966	0.957581	0.426968	2.14761
genus.Collinsella.id.815	Hypertrophic Scar	Simple mode	9	0.168163	0.403949	0.688137	1.18313	0.536024	2.61144
genus.Coprobacter.id.949	Hypertrophic Scar	Simple mode	11	0.220556	0.301785	0.481651	1.24677	0.690083	2.25253
genus.Coprococcus1.id.11301	Hypertrophic Scar	Simple mode	12	-0.0107341	0.458217	0.98173	0.989323	0.402992	2.42874
genus.Coprococcus2.id.11302	Hypertrophic Scar	Simple mode	8	0.622453	0.497309	0.250904	1.86349	0.703088	4.93908
genus.Coprococcus3.id.11303	Hypertrophic Scar	Simple mode	9	-0.190667	0.511728	0.719128	0.826408	0.303112	2.25313
genus.DefluviitaleaceaeUCG011.id.11287	Hypertrophic Scar	Simple mode	9	-0.0215788	0.345522	0.951734	0.978652	0.497181	1.92638
genus.Desulfovibrio.id.3173	Hypertrophic Scar	Simple mode	10	0.248656	0.351899	0.497693	1.2823	0.64335	2.55583
genus.Dialister.id.2183	Hypertrophic Scar	Simple mode	10	0.176362	0.401011	0.670459	1.19287	0.543557	2.61783
genus.Dorea.id.1997	Hypertrophic Scar	Simple mode	10	-0.060981	0.460304	0.897519	0.940841	0.381679	2.31918
genus.Eggerthella.id.819	Hypertrophic Scar	Simple mode	10	-0.280549	0.310362	0.389581	0.755369	0.411125	1.38786
genus.Eisenbergiella.id.11304	Hypertrophic Scar	Simple mode	11	0.0863236	0.243335	0.730143	1.09016	0.676642	1.75639
genus.Enterorhabdus.id.820	Hypertrophic Scar	Simple mode	6	-0.354625	0.431469	0.448536	0.701436	0.301103	1.63404
genus.Erysipelatoclostridium.id.11381	Hypertrophic Scar	Simple mode	15	0.0301161	0.337658	0.930193	1.03057	0.53169	1.99756
genus.ErysipelotrichaceaeUCG003.id.11384	Hypertrophic Scar	Simple mode	16	0.0711543	0.411942	0.865173	1.07375	0.478906	2.40743
genus.Escherichia.Shigella.id.3504	Hypertrophic Scar	Simple mode	10	0.0326456	0.39426	0.935821	1.03318	0.477064	2.23758
genus.Faecalibacterium.id.2057	Hypertrophic Scar	Simple mode	10	-0.149565	0.356992	0.685068	0.861082	0.427727	1.7335
genus.FamilyXIIIAD3011group.id.11293	Hypertrophic Scar	Simple mode	13	0.448601	0.404848	0.289547	1.56612	0.70829	3.46289
genus.FamilyXIIIUCG001.id.11294	Hypertrophic Scar	Simple mode	8	0.371811	0.45281	0.438644	1.45036	0.597085	3.52302
genus.Flavonifractor.id.2059	Hypertrophic Scar	Simple mode	5	-0.219456	0.377604	0.592293	0.802955	0.383061	1.68312
genus.Fusicatenibacter.id.11305	Hypertrophic Scar	Simple mode	18	0.12498	0.444381	0.781917	1.13313	0.474257	2.70734
genus.Gordonibacter.id.821	Hypertrophic Scar	Simple mode	11	0.093934	0.234111	0.696685	1.09849	0.69425	1.7381
genus.Haemophilus.id.3698	Hypertrophic Scar	Simple mode	9	0.150916	0.308245	0.63756	1.1629	0.635563	2.12778
genus.Holdemanella.id.11393	Hypertrophic Scar	Simple mode	11	0.0944183	0.292218	0.753268	1.09902	0.619818	1.94871
genus.Holdemania.id.2157	Hypertrophic Scar	Simple mode	15	-0.222053	0.333017	0.515745	0.800873	0.41696	1.53827
genus.Howardella.id.2000	Hypertrophic Scar	Simple mode	10	-0.222578	0.197939	0.289906	0.800453	0.543058	1.17984
genus.Hungatella.id.11306	Hypertrophic Scar	Simple mode	5	0.0435643	0.243339	0.866619	1.04453	0.648314	1.68288
genus.Intestinibacter.id.11345	Hypertrophic Scar	Simple mode	14	-0.575468	0.471821	0.244255	0.562442	0.223078	1.41808
genus.Intestinimonas.id.2062	Hypertrophic Scar	Simple mode	16	-0.24869	0.332593	0.466184	0.779822	0.406337	1.49659
genus.Lachnoclostridium.id.11308	Hypertrophic Scar	Simple mode	13	0.279876	0.484432	0.57412	1.32297	0.511908	3.41905
genus.Lachnospira.id.2004	Hypertrophic Scar	Simple mode	6	0.293311	0.556116	0.620453	1.34086	0.450825	3.98803
genus.LachnospiraceaeFCS020group.id.11314	Hypertrophic Scar	Simple mode	12	-0.215222	0.434466	0.630085	0.806362	0.344116	1.88954
genus.LachnospiraceaeNC2004group.id.11316	Hypertrophic Scar	Simple mode	9	0.343431	0.286502	0.264944	1.40978	0.804035	2.47187
genus.LachnospiraceaeND3007group.id.11317	Hypertrophic Scar	Simple mode	3	0.12736	0.557703	0.840586	1.13583	0.380702	3.38874
genus.LachnospiraceaeNK4A136group.id.11319	Hypertrophic Scar	Simple mode	15	-0.279002	0.36225	0.453986	0.756538	0.371944	1.53881
genus.LachnospiraceaeUCG001.id.11321	Hypertrophic Scar	Simple mode	13	-0.028049	0.304262	0.928071	0.972341	0.535582	1.76527
genus.LachnospiraceaeUCG004.id.11324	Hypertrophic Scar	Simple mode	12	-0.160152	0.358652	0.663872	0.852015	0.421848	1.72083
genus.LachnospiraceaeUCG008.id.11328	Hypertrophic Scar	Simple mode	10	0.173413	0.317586	0.598315	1.18936	0.63823	2.21639
genus.LachnospiraceaeUCG010.id.11330	Hypertrophic Scar	Simple mode	10	-0.287328	0.426852	0.517773	0.750266	0.324991	1.73204
genus.Lactobacillus.id.1837	Hypertrophic Scar	Simple mode	8	-0.0928501	0.26055	0.732069	0.91133	0.546878	1.51866
genus.Lactococcus.id.1851	Hypertrophic Scar	Simple mode	9	-0.0210022	0.284094	0.942884	0.979217	0.561117	1.70885
genus.Marvinbryantia.id.2005	Hypertrophic Scar	Simple mode	10	0.307653	0.373553	0.431457	1.36023	0.65409	2.8287
genus.Methanobrevibacter.id.123	Hypertrophic Scar	Simple mode	6	0.0760618	0.262565	0.783684	1.07903	0.644961	1.80523
genus.Odoribacter.id.952	Hypertrophic Scar	Simple mode	7	-0.025669	0.517218	0.962029	0.974658	0.353661	2.68607
genus.Olsenella.id.822	Hypertrophic Scar	Simple mode	11	0.128963	0.221164	0.572732	1.13765	0.737479	1.75496
genus.Oscillibacter.id.2063	Hypertrophic Scar	Simple mode	13	0.0853738	0.265912	0.753688	1.08912	0.646738	1.83411
genus.Oscillospira.id.2064	Hypertrophic Scar	Simple mode	8	0.0878381	0.335822	0.801189	1.09181	0.565314	2.10865
genus.Oxalobacter.id.2978	Hypertrophic Scar	Simple mode	11	0.0681041	0.237675	0.780311	1.07048	0.671838	1.70565
genus.Parabacteroides.id.954	Hypertrophic Scar	Simple mode	5	0.688527	0.556412	0.283599	1.99078	0.668954	5.92449
genus.Paraprevotella.id.962	Hypertrophic Scar	Simple mode	13	0.105151	0.233839	0.66096	1.11088	0.702456	1.75677
genus.Parasutterella.id.2892	Hypertrophic Scar	Simple mode	14	-0.0278219	0.302589	0.928143	0.972562	0.537463	1.75989
genus.Peptococcus.id.2037	Hypertrophic Scar	Simple mode	12	-0.0388004	0.239413	0.874194	0.961943	0.601667	1.53795
genus.Phascolarctobacterium.id.2168	Hypertrophic Scar	Simple mode	9	0.344956	0.35365	0.357921	1.41193	0.70596	2.82387
genus.Prevotella7.id.11182	Hypertrophic Scar	Simple mode	11	0.0249461	0.21046	0.907994	1.02526	0.678714	1.54875
genus.Prevotella9.id.11183	Hypertrophic Scar	Simple mode	15	0.0311033	0.390161	0.937589	1.03159	0.480172	2.21625
genus.RikenellaceaeRC9gutgroup.id.11191	Hypertrophic Scar	Simple mode	11	0.145048	0.235277	0.551342	1.15609	0.72899	1.83344
genus.Romboutsia.id.11347	Hypertrophic Scar	Simple mode	13	0.324237	0.378074	0.407914	1.38298	0.659161	2.9016
genus.Roseburia.id.2012	Hypertrophic Scar	Simple mode	14	-0.191012	0.442244	0.67288	0.826123	0.347216	1.96558
genus.Ruminiclostridium5.id.11355	Hypertrophic Scar	Simple mode	10	-0.109198	0.481564	0.825679	0.896553	0.348867	2.30405
genus.Ruminiclostridium6.id.11356	Hypertrophic Scar	Simple mode	16	0.361808	0.356658	0.326458	1.43592	0.713736	2.88885
genus.Ruminiclostridium9.id.11357	Hypertrophic Scar	Simple mode	9	0.416232	0.524546	0.450374	1.51624	0.542331	4.23907
genus.RuminococcaceaeNK4A214group.id.11358	Hypertrophic Scar	Simple mode	13	0.234372	0.420919	0.587891	1.26412	0.553979	2.88456
genus.RuminococcaceaeUCG002.id.11360	Hypertrophic Scar	Simple mode	21	-0.147543	0.336397	0.665654	0.862825	0.446248	1.66828
genus.RuminococcaceaeUCG003.id.11361	Hypertrophic Scar	Simple mode	12	0.0348553	0.378476	0.928279	1.03547	0.493143	2.17421
genus.RuminococcaceaeUCG004.id.11362	Hypertrophic Scar	Simple mode	11	0.264386	0.384709	0.507558	1.30263	0.612845	2.7688
genus.RuminococcaceaeUCG005.id.11363	Hypertrophic Scar	Simple mode	14	-0.124323	0.360027	0.73538	0.883095	0.43606	1.78842
genus.RuminococcaceaeUCG009.id.11366	Hypertrophic Scar	Simple mode	11	-0.224173	0.272262	0.429494	0.799177	0.468693	1.36269
genus.RuminococcaceaeUCG010.id.11367	Hypertrophic Scar	Simple mode	6	-0.0396468	0.435519	0.931001	0.961129	0.409318	2.25685
genus.RuminococcaceaeUCG011.id.11368	Hypertrophic Scar	Simple mode	8	0.275221	0.278302	0.355641	1.31682	0.763188	2.27207
genus.RuminococcaceaeUCG013.id.11370	Hypertrophic Scar	Simple mode	11	0.0641691	0.403666	0.87686	1.06627	0.483349	2.35221
genus.RuminococcaceaeUCG014.id.11371	Hypertrophic Scar	Simple mode	11	0.0233711	0.42241	0.956967	1.02365	0.447288	2.34268
genus.Ruminococcus1.id.11373	Hypertrophic Scar	Simple mode	10	-0.147261	0.499911	0.775001	0.863069	0.323976	2.29921
genus.Ruminococcus2.id.11374	Hypertrophic Scar	Simple mode	15	0.18508	0.317751	0.569515	1.20331	0.645511	2.24313
genus.Sellimonas.id.14369	Hypertrophic Scar	Simple mode	9	-0.251157	0.194135	0.23186	0.7779	0.531708	1.13809
genus.Senegalimassilia.id.11160	Hypertrophic Scar	Simple mode	5	-0.359009	0.397863	0.417899	0.698368	0.320196	1.52319
genus.Slackia.id.825	Hypertrophic Scar	Simple mode	6	-0.10005	0.4171	0.819955	0.904792	0.39949	2.04923
genus.Streptococcus.id.1853	Hypertrophic Scar	Simple mode	15	-0.0456397	0.383888	0.907053	0.955386	0.450202	2.02745
genus.Subdoligranulum.id.2070	Hypertrophic Scar	Simple mode	11	0.251112	0.428886	0.571188	1.28545	0.554602	2.97942
genus.Sutterella.id.2896	Hypertrophic Scar	Simple mode	12	0.251984	0.421911	0.562436	1.28658	0.562727	2.94153
genus.Terrisporobacter.id.11348	Hypertrophic Scar	Simple mode	5	-0.0758145	0.343474	0.836113	0.926988	0.472828	1.81738
genus.Turicibacter.id.2162	Hypertrophic Scar	Simple mode	10	0.0810656	0.339238	0.816487	1.08444	0.557752	2.10849
genus.Tyzzerella3.id.11335	Hypertrophic Scar	Simple mode	13	-0.0766237	0.27287	0.783642	0.926238	0.542564	1.58123
genus.Veillonella.id.2198	Hypertrophic Scar	Simple mode	6	-0.362886	0.331052	0.322976	0.695666	0.363583	1.33106
genus.Victivallis.id.2256	Hypertrophic Scar	Simple mode	10	0.231512	0.209071	0.296863	1.2605	0.83672	1.89893
order.Actinomycetales.id.420	Hypertrophic Scar	Simple mode	4	0.0894594	0.38537	0.831365	1.09358	0.513828	2.32748
order.Bacillales.id.1674	Hypertrophic Scar	Simple mode	8	-0.107661	0.214209	0.63067	0.897932	0.590071	1.36641
order.Bacteroidales.id.913	Hypertrophic Scar	Simple mode	12	-0.434948	0.490598	0.394281	0.647298	0.247457	1.69321
order.Bifidobacteriales.id.432	Hypertrophic Scar	Simple mode	11	-0.260264	0.338195	0.459348	0.770848	0.397275	1.49571
order.Burkholderiales.id.2874	Hypertrophic Scar	Simple mode	10	-0.032432	0.428675	0.941348	0.968088	0.417849	2.2429
order.Clostridiales.id.1863	Hypertrophic Scar	Simple mode	13	0.451279	0.498911	0.383516	1.57032	0.590618	4.17512
order.Coriobacteriales.id.810	Hypertrophic Scar	Simple mode	14	-0.475955	0.470527	0.330218	0.621292	0.247044	1.56249
order.Desulfovibrionales.id.3156	Hypertrophic Scar	Simple mode	12	0.819432	0.432319	0.0846013	2.26921	0.972474	5.29507
order.Enterobacteriales.id.3468	Hypertrophic Scar	Simple mode	7	-0.220278	0.416583	0.615943	0.802295	0.354594	1.81525
order.Erysipelotrichales.id.2148	Hypertrophic Scar	Simple mode	13	0.481258	0.473256	0.329262	1.61811	0.639977	4.0912
order.Gastranaerophilales.id.1591	Hypertrophic Scar	Simple mode	9	0.255865	0.357044	0.493994	1.29158	0.641504	2.60041
order.Lactobacillales.id.1800	Hypertrophic Scar	Simple mode	15	-0.379322	0.374178	0.327904	0.684326	0.328667	1.42485
order.Methanobacteriales.id.120	Hypertrophic Scar	Simple mode	10	-0.0655254	0.21046	0.76263	0.936575	0.620006	1.41478
order.MollicutesRF9.id.11579	Hypertrophic Scar	Simple mode	13	0.429064	0.375046	0.274919	1.53582	0.736368	3.20321
order.NB1n.id.3953	Hypertrophic Scar	Simple mode	12	-0.119851	0.290708	0.688059	0.887052	0.501757	1.56821
order.Pasteurellales.id.3688	Hypertrophic Scar	Simple mode	14	0.207603	0.285251	0.479645	1.23072	0.70364	2.15264
order.Rhodospirillales.id.2667	Hypertrophic Scar	Simple mode	14	-0.0900243	0.293685	0.764053	0.913909	0.513941	1.62515
order.Selenomonadales.id.2165	Hypertrophic Scar	Simple mode	12	-0.0347216	0.479144	0.943532	0.965874	0.377629	2.47045
order.Verrucomicrobiales.id.4030	Hypertrophic Scar	Simple mode	11	0.309994	0.367345	0.418468	1.36342	0.663649	2.80104
order.Victivallales.id.2254	Hypertrophic Scar	Simple mode	8	-0.230306	0.261507	0.407706	0.794291	0.475751	1.32611
phylum.Actinobacteria.id.400	Hypertrophic Scar	Simple mode	15	0.125717	0.470703	0.793299	1.13396	0.450741	2.85278
phylum.Bacteroidetes.id.905	Hypertrophic Scar	Simple mode	10	-0.429323	0.503101	0.415597	0.65095	0.242828	1.745
phylum.Cyanobacteria.id.1500	Hypertrophic Scar	Simple mode	8	-0.144817	0.30386	0.648171	0.865181	0.476932	1.56949
phylum.Euryarchaeota.id.55	Hypertrophic Scar	Simple mode	12	-0.030364	0.196554	0.880028	0.970092	0.659938	1.42601
phylum.Firmicutes.id.1672	Hypertrophic Scar	Simple mode	15	-0.406265	0.334505	0.244635	0.666134	0.3458	1.28321
phylum.Lentisphaerae.id.2238	Hypertrophic Scar	Simple mode	9	-0.18611	0.258146	0.491468	0.830182	0.500536	1.37693
phylum.Proteobacteria.id.2375	Hypertrophic Scar	Simple mode	12	0.470948	0.446038	0.313676	1.60151	0.66812	3.83889
phylum.Tenericutes.id.3919	Hypertrophic Scar	Simple mode	12	0.426647	0.354573	0.254129	1.53211	0.764666	3.06979
phylum.Verrucomicrobia.id.3982	Hypertrophic Scar	Simple mode	12	0.297418	0.310108	0.358126	1.34638	0.733158	2.4725

## Sheet: Weighted Mode
id.exposure	outcome	method	nsnp	b	se	p	OR	OR_lci95	OR_uci95
class.Actinobacteria.id.419	Hypertrophic Scar	Weighted mode	15	0.536524	0.33255	0.128971	1.71005	0.891123	3.28157
class.Alphaproteobacteria.id.2379	Hypertrophic Scar	Weighted mode	7	0.342078	0.324724	0.332701	1.40787	0.744992	2.66056
class.Bacilli.id.1673	Hypertrophic Scar	Weighted mode	18	-0.366471	0.335227	0.289554	0.693176	0.359329	1.33719
class.Bacteroidia.id.912	Hypertrophic Scar	Weighted mode	12	-0.455602	0.489426	0.37189	0.634066	0.242956	1.65479
class.Betaproteobacteria.id.2867	Hypertrophic Scar	Weighted mode	10	-0.19792	0.432777	0.658277	0.820436	0.351283	1.91616
class.Clostridia.id.1859	Hypertrophic Scar	Weighted mode	12	-0.482038	0.461124	0.318287	0.617524	0.250113	1.52465
class.Coriobacteriia.id.809	Hypertrophic Scar	Weighted mode	14	-0.532994	0.448513	0.255949	0.586845	0.243636	1.41353
class.Deltaproteobacteria.id.3087	Hypertrophic Scar	Weighted mode	13	0.212373	0.317324	0.515998	1.23661	0.663928	2.30326
class.Erysipelotrichia.id.2147	Hypertrophic Scar	Weighted mode	13	0.464255	0.477327	0.349943	1.59083	0.624187	4.05445
class.Gammaproteobacteria.id.3303	Hypertrophic Scar	Weighted mode	7	-0.136217	0.457617	0.775997	0.872654	0.355885	2.1398
class.Lentisphaeria.id.2250	Hypertrophic Scar	Weighted mode	8	-0.23467	0.272996	0.418466	0.790832	0.463133	1.3504
class.Melainabacteria.id.1589	Hypertrophic Scar	Weighted mode	10	0.39289	0.324383	0.256665	1.48126	0.784349	2.79737
class.Methanobacteria.id.119	Hypertrophic Scar	Weighted mode	10	-0.0468212	0.220389	0.836491	0.954258	0.619537	1.46982
class.Mollicutes.id.3920	Hypertrophic Scar	Weighted mode	12	0.362981	0.327409	0.291234	1.43761	0.756736	2.7311
class.Negativicutes.id.2164	Hypertrophic Scar	Weighted mode	12	0.0264609	0.480619	0.957081	1.02681	0.400295	2.63392
class.Verrucomicrobiae.id.4029	Hypertrophic Scar	Weighted mode	11	0.270681	0.342076	0.447137	1.31086	0.670462	2.56293
family.Acidaminococcaceae.id.2166	Hypertrophic Scar	Weighted mode	7	0.00459509	0.360675	0.990248	1.00461	0.495431	2.03708
family.Actinomycetaceae.id.421	Hypertrophic Scar	Weighted mode	4	-0.361734	0.273243	0.277387	0.696468	0.407672	1.18984
family.Alcaligenaceae.id.2875	Hypertrophic Scar	Weighted mode	11	0.402729	0.532554	0.466957	1.4959	0.526725	4.24837
family.Bacteroidaceae.id.917	Hypertrophic Scar	Weighted mode	9	-0.274986	0.396716	0.507832	0.759583	0.349047	1.65298
family.BacteroidalesS24.7group.id.11173	Hypertrophic Scar	Weighted mode	8	-0.0647514	0.324482	0.847503	0.9373	0.49622	1.77045
family.Bifidobacteriaceae.id.433	Hypertrophic Scar	Weighted mode	11	-0.302054	0.280768	0.30728	0.739298	0.426408	1.28178
family.Christensenellaceae.id.1866	Hypertrophic Scar	Weighted mode	11	-0.114583	0.219339	0.612765	0.891738	0.58014	1.3707
family.Clostridiaceae1.id.1869	Hypertrophic Scar	Weighted mode	10	-0.123772	0.391665	0.759197	0.883581	0.410067	1.90388
family.ClostridialesvadinBB60group.id.11286	Hypertrophic Scar	Weighted mode	15	-0.211335	0.219811	0.352644	0.809503	0.526152	1.24545
family.Coriobacteriaceae.id.811	Hypertrophic Scar	Weighted mode	14	-0.532994	0.458997	0.266433	0.586845	0.23868	1.44288
family.Defluviitaleaceae.id.1924	Hypertrophic Scar	Weighted mode	11	-0.0273305	0.361341	0.9412	0.97304	0.479238	1.97565
family.Desulfovibrionaceae.id.3169	Hypertrophic Scar	Weighted mode	10	0.0852335	0.336511	0.805738	1.08897	0.563083	2.10601
family.Enterobacteriaceae.id.3469	Hypertrophic Scar	Weighted mode	7	-0.220278	0.414	0.613791	0.802295	0.356394	1.80608
family.Erysipelotrichaceae.id.2149	Hypertrophic Scar	Weighted mode	13	0.464255	0.4729	0.345617	1.59083	0.629626	4.01943
family.FamilyXI.id.1936	Hypertrophic Scar	Weighted mode	8	-0.22188	0.260701	0.422873	0.801011	0.480536	1.33522
family.FamilyXIII.id.1957	Hypertrophic Scar	Weighted mode	10	-0.0724648	0.336611	0.83435	0.930099	0.48084	1.79911
family.Lachnospiraceae.id.1987	Hypertrophic Scar	Weighted mode	16	-0.122543	0.476895	0.800701	0.884668	0.347407	2.25279
family.Lactobacillaceae.id.1836	Hypertrophic Scar	Weighted mode	8	-0.0860528	0.219117	0.706207	0.917546	0.597189	1.40976
family.Methanobacteriaceae.id.121	Hypertrophic Scar	Weighted mode	10	-0.0468212	0.205915	0.825209	0.954258	0.637364	1.42871
family.Oxalobacteraceae.id.2966	Hypertrophic Scar	Weighted mode	14	0.210376	0.23189	0.380797	1.23414	0.783387	1.94426
family.Pasteurellaceae.id.3689	Hypertrophic Scar	Weighted mode	14	0.201456	0.233953	0.404788	1.22318	0.773297	1.9348
family.Peptococcaceae.id.2024	Hypertrophic Scar	Weighted mode	9	0.0948078	0.361866	0.799944	1.09945	0.540938	2.23461
family.Peptostreptococcaceae.id.2042	Hypertrophic Scar	Weighted mode	13	-0.218154	0.257916	0.414194	0.804002	0.48497	1.33291
family.Porphyromonadaceae.id.943	Hypertrophic Scar	Weighted mode	9	0.226262	0.528287	0.679735	1.2539	0.445223	3.53143
family.Prevotellaceae.id.960	Hypertrophic Scar	Weighted mode	16	-0.235725	0.394815	0.559378	0.789998	0.364378	1.71277
family.Rhodospirillaceae.id.2717	Hypertrophic Scar	Weighted mode	15	-0.029166	0.292764	0.922056	0.971255	0.547177	1.72401
family.Rikenellaceae.id.967	Hypertrophic Scar	Weighted mode	16	0.234516	0.403078	0.569333	1.2643	0.573776	2.78584
family.Ruminococcaceae.id.2050	Hypertrophic Scar	Weighted mode	10	-0.291179	0.330516	0.401242	0.747382	0.391022	1.42851
family.Streptococcaceae.id.1850	Hypertrophic Scar	Weighted mode	14	-0.110574	0.36417	0.766213	0.89532	0.438522	1.82796
family.Veillonellaceae.id.2172	Hypertrophic Scar	Weighted mode	19	-0.0233918	0.26035	0.9294	0.97688	0.586444	1.62725
family.Verrucomicrobiaceae.id.4036	Hypertrophic Scar	Weighted mode	11	0.271094	0.330353	0.430991	1.3114	0.686329	2.50574
family.Victivallaceae.id.2255	Hypertrophic Scar	Weighted mode	12	0.152806	0.203346	0.46815	1.1651	0.782116	1.73562
genus.Clostridiuminnocuumgroup.id.14397	Hypertrophic Scar	Weighted mode	8	0.0496754	0.202815	0.813536	1.05093	0.70621	1.56392
genus.Eubacteriumbrachygroup.id.11296	Hypertrophic Scar	Weighted mode	10	0.0580669	0.248017	0.820127	1.05979	0.651781	1.7232
genus.Eubacteriumcoprostanoligenesgroup.id.11375	Hypertrophic Scar	Weighted mode	13	-0.667139	0.435601	0.151565	0.513175	0.218511	1.20519
genus.Eubacteriumeligensgroup.id.14372	Hypertrophic Scar	Weighted mode	7	-0.0809152	0.566867	0.891168	0.922272	0.303621	2.80147
genus.Eubacteriumfissicatenagroup.id.14373	Hypertrophic Scar	Weighted mode	9	0.29216	0.222113	0.224834	1.33932	0.866596	2.0699
genus.Eubacteriumhalliigroup.id.11338	Hypertrophic Scar	Weighted mode	14	-0.592574	0.39928	0.161619	0.552902	0.252799	1.20927
genus.Eubacteriumnodatumgroup.id.11297	Hypertrophic Scar	Weighted mode	11	0.112372	0.189681	0.566719	1.11893	0.771512	1.62279
genus.Eubacteriumoxidoreducensgroup.id.11339	Hypertrophic Scar	Weighted mode	5	-0.0362075	0.272846	0.900836	0.96444	0.564968	1.64637
genus.Eubacteriumrectalegroup.id.14374	Hypertrophic Scar	Weighted mode	8	-0.57405	0.491078	0.280683	0.56324	0.215119	1.47471
genus.Eubacteriumruminantiumgroup.id.11340	Hypertrophic Scar	Weighted mode	18	-0.0818669	0.221009	0.715643	0.921395	0.597474	1.42093
genus.Eubacteriumventriosumgroup.id.11341	Hypertrophic Scar	Weighted mode	15	0.118064	0.390303	0.766723	1.12532	0.523651	2.41828
genus.Eubacteriumxylanophilumgroup.id.14375	Hypertrophic Scar	Weighted mode	9	-0.29237	0.333203	0.40582	0.746492	0.388505	1.43435
genus.Ruminococcusgauvreauiigroup.id.11342	Hypertrophic Scar	Weighted mode	12	-0.07399	0.347391	0.835233	0.928681	0.470069	1.83473
genus.Ruminococcusgnavusgroup.id.14376	Hypertrophic Scar	Weighted mode	11	0.320697	0.253683	0.234842	1.37809	0.838181	2.26577
genus.Ruminococcustorquesgroup.id.14377	Hypertrophic Scar	Weighted mode	9	0.0946885	0.493046	0.85249	1.09932	0.418248	2.88943
genus.Actinomyces.id.423	Hypertrophic Scar	Weighted mode	7	0.214258	0.335196	0.546305	1.23894	0.642283	2.38988
genus.Adlercreutzia.id.812	Hypertrophic Scar	Weighted mode	8	0.463454	0.326691	0.198958	1.58956	0.837898	3.01551
genus.Akkermansia.id.4037	Hypertrophic Scar	Weighted mode	11	0.271882	0.33408	0.434697	1.31243	0.681871	2.5261
genus.Alistipes.id.968	Hypertrophic Scar	Weighted mode	13	0.214498	0.420829	0.619503	1.23924	0.543174	2.8273
genus.Allisonella.id.2174	Hypertrophic Scar	Weighted mode	8	-0.205313	0.287272	0.49793	0.814392	0.46377	1.43009
genus.Alloprevotella.id.961	Hypertrophic Scar	Weighted mode	5	-0.206952	0.239214	0.435767	0.813059	0.508744	1.29941
genus.Anaerofilum.id.2053	Hypertrophic Scar	Weighted mode	10	0.352896	0.287042	0.250084	1.42318	0.810822	2.49802
genus.Anaerostipes.id.1991	Hypertrophic Scar	Weighted mode	13	0.0299588	0.463113	0.949486	1.03041	0.41572	2.554
genus.Anaerotruncus.id.2054	Hypertrophic Scar	Weighted mode	13	0.0145268	0.383405	0.970399	1.01463	0.478573	2.15114
genus.Bacteroides.id.918	Hypertrophic Scar	Weighted mode	9	-0.274986	0.429036	0.539484	0.759583	0.327621	1.76107
genus.Barnesiella.id.944	Hypertrophic Scar	Weighted mode	13	0.337742	0.393189	0.407183	1.40178	0.64862	3.02948
genus.Bifidobacterium.id.436	Hypertrophic Scar	Weighted mode	12	0.117283	0.2661	0.667931	1.12444	0.667462	1.89428
genus.Bilophila.id.3170	Hypertrophic Scar	Weighted mode	13	-0.338768	0.371868	0.380236	0.712648	0.343823	1.47712
genus.Blautia.id.1992	Hypertrophic Scar	Weighted mode	13	0.126986	0.444992	0.780229	1.1354	0.47464	2.71603
genus.Butyricicoccus.id.2055	Hypertrophic Scar	Weighted mode	8	-0.37769	0.491086	0.466991	0.685443	0.261789	1.7947
genus.Butyricimonas.id.945	Hypertrophic Scar	Weighted mode	13	-0.0372908	0.387654	0.924953	0.963396	0.450637	2.0596
genus.Butyrivibrio.id.1993	Hypertrophic Scar	Weighted mode	15	-0.0625898	0.207437	0.767294	0.939329	0.625524	1.41056
genus.CandidatusSoleaferrea.id.11350	Hypertrophic Scar	Weighted mode	9	0.32276	0.282698	0.286593	1.38093	0.793479	2.40332
genus.Catenibacterium.id.2153	Hypertrophic Scar	Weighted mode	4	-0.020339	0.261178	0.942831	0.979866	0.587283	1.63488
genus.ChristensenellaceaeR.7group.id.11283	Hypertrophic Scar	Weighted mode	9	0.0709889	0.592078	0.90752	1.07357	0.33639	3.42623
genus.Clostridiumsensustricto1.id.1873	Hypertrophic Scar	Weighted mode	7	-0.0503164	0.383794	0.899979	0.950928	0.448184	2.01762
genus.Collinsella.id.815	Hypertrophic Scar	Weighted mode	9	0.168163	0.441826	0.713401	1.18313	0.497671	2.81269
genus.Coprobacter.id.949	Hypertrophic Scar	Weighted mode	11	0.206225	0.327703	0.543257	1.22903	0.646571	2.33619
genus.Coprococcus1.id.11301	Hypertrophic Scar	Weighted mode	12	-0.115822	0.411355	0.783506	0.890634	0.397692	1.99458
genus.Coprococcus2.id.11302	Hypertrophic Scar	Weighted mode	8	0.616444	0.470105	0.231132	1.85233	0.737153	4.65457
genus.Coprococcus3.id.11303	Hypertrophic Scar	Weighted mode	9	-0.166278	0.49482	0.745487	0.846811	0.321061	2.2335
genus.DefluviitaleaceaeUCG011.id.11287	Hypertrophic Scar	Weighted mode	9	-0.05529	0.35467	0.87998	0.946211	0.472157	1.89622
genus.Desulfovibrio.id.3173	Hypertrophic Scar	Weighted mode	10	0.0733075	0.368528	0.846747	1.07606	0.522564	2.21582
genus.Dialister.id.2183	Hypertrophic Scar	Weighted mode	10	0.151684	0.416216	0.723948	1.16379	0.514737	2.63127
genus.Dorea.id.1997	Hypertrophic Scar	Weighted mode	10	0.02006	0.390788	0.960182	1.02026	0.474315	2.19461
genus.Eggerthella.id.819	Hypertrophic Scar	Weighted mode	10	-0.258797	0.27897	0.377776	0.77198	0.44683	1.33374
genus.Eisenbergiella.id.11304	Hypertrophic Scar	Weighted mode	11	0.0949311	0.261096	0.723736	1.09958	0.659141	1.83433
genus.Enterorhabdus.id.820	Hypertrophic Scar	Weighted mode	6	-0.116029	0.339633	0.746519	0.89045	0.457623	1.73265
genus.Erysipelatoclostridium.id.11381	Hypertrophic Scar	Weighted mode	15	0.0301161	0.323652	0.927182	1.03057	0.546489	1.94347
genus.ErysipelotrichaceaeUCG003.id.11384	Hypertrophic Scar	Weighted mode	16	0.109004	0.459354	0.815636	1.11517	0.453241	2.74378
genus.Escherichia.Shigella.id.3504	Hypertrophic Scar	Weighted mode	10	-0.0114865	0.4123	0.978382	0.988579	0.440611	2.21803
genus.Faecalibacterium.id.2057	Hypertrophic Scar	Weighted mode	10	-0.273491	0.265138	0.329226	0.760719	0.452412	1.27913
genus.FamilyXIIIAD3011group.id.11293	Hypertrophic Scar	Weighted mode	13	0.431077	0.384011	0.283581	1.53891	0.725	3.26656
genus.FamilyXIIIUCG001.id.11294	Hypertrophic Scar	Weighted mode	8	0.35207	0.409148	0.418011	1.42201	0.637717	3.17085
genus.Flavonifractor.id.2059	Hypertrophic Scar	Weighted mode	5	-0.207505	0.378364	0.61257	0.812609	0.38709	1.70589
genus.Fusicatenibacter.id.11305	Hypertrophic Scar	Weighted mode	18	0.135447	0.460376	0.772161	1.14505	0.464455	2.82295
genus.Gordonibacter.id.821	Hypertrophic Scar	Weighted mode	11	0.106187	0.223492	0.644902	1.11203	0.71759	1.72328
genus.Haemophilus.id.3698	Hypertrophic Scar	Weighted mode	9	0.150916	0.295179	0.62297	1.1629	0.652049	2.07398
genus.Holdemanella.id.11393	Hypertrophic Scar	Weighted mode	11	0.103316	0.295503	0.73387	1.10884	0.621344	1.97882
genus.Holdemania.id.2157	Hypertrophic Scar	Weighted mode	15	0.00582027	0.307813	0.985181	1.00584	0.55019	1.83884
genus.Howardella.id.2000	Hypertrophic Scar	Weighted mode	10	-0.222578	0.165744	0.212187	0.800453	0.578431	1.10769
genus.Hungatella.id.11306	Hypertrophic Scar	Weighted mode	5	0.0945862	0.244707	0.718787	1.0992	0.680423	1.77573
genus.Intestinibacter.id.11345	Hypertrophic Scar	Weighted mode	14	0.265094	0.410417	0.529572	1.30355	0.583143	2.91395
genus.Intestinimonas.id.2062	Hypertrophic Scar	Weighted mode	16	-0.113368	0.319855	0.727946	0.892822	0.476979	1.67121
genus.Lachnoclostridium.id.11308	Hypertrophic Scar	Weighted mode	13	0.136904	0.417523	0.748641	1.14672	0.505887	2.59932
genus.Lachnospira.id.2004	Hypertrophic Scar	Weighted mode	6	0.279397	0.50012	0.600487	1.32233	0.49617	3.52412
genus.LachnospiraceaeFCS020group.id.11314	Hypertrophic Scar	Weighted mode	12	-0.249369	0.460937	0.599289	0.779292	0.315749	1.92335
genus.LachnospiraceaeNC2004group.id.11316	Hypertrophic Scar	Weighted mode	9	0.35126	0.258797	0.211742	1.42086	0.855574	2.35963
genus.LachnospiraceaeND3007group.id.11317	Hypertrophic Scar	Weighted mode	3	0.143675	0.562108	0.822145	1.15451	0.383638	3.47435
genus.LachnospiraceaeNK4A136group.id.11319	Hypertrophic Scar	Weighted mode	15	-0.304888	0.255387	0.252383	0.737206	0.446888	1.21613
genus.LachnospiraceaeUCG001.id.11321	Hypertrophic Scar	Weighted mode	13	-0.0135553	0.296715	0.964313	0.986536	0.551498	1.76474
genus.LachnospiraceaeUCG004.id.11324	Hypertrophic Scar	Weighted mode	12	-0.160152	0.36403	0.668498	0.852015	0.417425	1.73906
genus.LachnospiraceaeUCG008.id.11328	Hypertrophic Scar	Weighted mode	10	0.167358	0.282474	0.56812	1.18218	0.679572	2.0565
genus.LachnospiraceaeUCG010.id.11330	Hypertrophic Scar	Weighted mode	10	-0.240997	0.403839	0.565371	0.785844	0.356108	1.73417
genus.Lactobacillus.id.1837	Hypertrophic Scar	Weighted mode	8	-0.10045	0.231379	0.677257	0.904431	0.574674	1.42341
genus.Lactococcus.id.1851	Hypertrophic Scar	Weighted mode	9	-0.0210022	0.26441	0.938641	0.979217	0.583187	1.64418
genus.Marvinbryantia.id.2005	Hypertrophic Scar	Weighted mode	10	0.333161	0.349626	0.365528	1.39537	0.703205	2.76884
genus.Methanobrevibacter.id.123	Hypertrophic Scar	Weighted mode	6	0.0858937	0.229758	0.723849	1.08969	0.694591	1.70953
genus.Odoribacter.id.952	Hypertrophic Scar	Weighted mode	7	-0.025669	0.466644	0.957918	0.974658	0.390514	2.43258
genus.Olsenella.id.822	Hypertrophic Scar	Weighted mode	11	0.167238	0.212831	0.450216	1.18204	0.77887	1.79389
genus.Oscillibacter.id.2063	Hypertrophic Scar	Weighted mode	13	0.0723261	0.272157	0.794941	1.07501	0.630589	1.83263
genus.Oscillospira.id.2064	Hypertrophic Scar	Weighted mode	8	0.000597047	0.327522	0.998596	1.0006	0.526583	1.90131
genus.Oxalobacter.id.2978	Hypertrophic Scar	Weighted mode	11	0.0863326	0.238167	0.724531	1.09017	0.683537	1.7387
genus.Parabacteroides.id.954	Hypertrophic Scar	Weighted mode	5	0.688527	0.497953	0.238934	1.99078	0.750165	5.28311
genus.Paraprevotella.id.962	Hypertrophic Scar	Weighted mode	13	0.105151	0.227275	0.651885	1.11088	0.711551	1.73431
genus.Parasutterella.id.2892	Hypertrophic Scar	Weighted mode	14	-0.0207852	0.264418	0.938542	0.979429	0.583305	1.64456
genus.Peptococcus.id.2037	Hypertrophic Scar	Weighted mode	12	-0.0323418	0.195517	0.871617	0.968176	0.659974	1.4203
genus.Phascolarctobacterium.id.2168	Hypertrophic Scar	Weighted mode	9	-0.0019319	0.351834	0.995753	0.99807	0.500811	1.98906
genus.Prevotella7.id.11182	Hypertrophic Scar	Weighted mode	11	0.0355515	0.195311	0.8592	1.03619	0.706623	1.51947
genus.Prevotella9.id.11183	Hypertrophic Scar	Weighted mode	15	-0.209634	0.361976	0.571697	0.810881	0.398875	1.64845
genus.RikenellaceaeRC9gutgroup.id.11191	Hypertrophic Scar	Weighted mode	11	0.122765	0.22323	0.594422	1.13062	0.729961	1.75119
genus.Romboutsia.id.11347	Hypertrophic Scar	Weighted mode	13	0.349709	0.321276	0.297753	1.41865	0.755789	2.66289
genus.Roseburia.id.2012	Hypertrophic Scar	Weighted mode	14	-0.217902	0.380889	0.577022	0.804204	0.381195	1.69662
genus.Ruminiclostridium5.id.11355	Hypertrophic Scar	Weighted mode	10	-0.11448	0.471942	0.813774	0.89183	0.353636	2.24909
genus.Ruminiclostridium6.id.11356	Hypertrophic Scar	Weighted mode	16	0.304505	0.322839	0.360518	1.35595	0.720177	2.553
genus.Ruminiclostridium9.id.11357	Hypertrophic Scar	Weighted mode	9	0.408635	0.532779	0.465119	1.50476	0.529611	4.27542
genus.RuminococcaceaeNK4A214group.id.11358	Hypertrophic Scar	Weighted mode	13	-0.346746	0.367456	0.363966	0.706985	0.344053	1.45276
genus.RuminococcaceaeUCG002.id.11360	Hypertrophic Scar	Weighted mode	21	-0.218262	0.275665	0.437788	0.803915	0.468338	1.37994
genus.RuminococcaceaeUCG003.id.11361	Hypertrophic Scar	Weighted mode	12	0.109531	0.358293	0.765538	1.11575	0.55282	2.25192
genus.RuminococcaceaeUCG004.id.11362	Hypertrophic Scar	Weighted mode	11	0.25714	0.370777	0.503774	1.29323	0.625263	2.67477
genus.RuminococcaceaeUCG005.id.11363	Hypertrophic Scar	Weighted mode	14	-0.0495157	0.280542	0.862621	0.95169	0.549153	1.64929
genus.RuminococcaceaeUCG009.id.11366	Hypertrophic Scar	Weighted mode	11	-0.224173	0.265419	0.418081	0.799177	0.475022	1.34453
genus.RuminococcaceaeUCG010.id.11367	Hypertrophic Scar	Weighted mode	6	0.0640763	0.347586	0.860985	1.06617	0.539457	2.10717
genus.RuminococcaceaeUCG011.id.11368	Hypertrophic Scar	Weighted mode	8	0.291723	0.273235	0.321104	1.33873	0.78363	2.28705
genus.RuminococcaceaeUCG013.id.11370	Hypertrophic Scar	Weighted mode	11	0.112683	0.366686	0.76492	1.11928	0.545516	2.2965
genus.RuminococcaceaeUCG014.id.11371	Hypertrophic Scar	Weighted mode	11	-0.230672	0.273312	0.418408	0.793999	0.464699	1.35665
genus.Ruminococcus1.id.11373	Hypertrophic Scar	Weighted mode	10	-0.211935	0.350704	0.560559	0.809017	0.406849	1.60873
genus.Ruminococcus2.id.11374	Hypertrophic Scar	Weighted mode	15	0.110004	0.270944	0.690878	1.11628	0.65636	1.89848
genus.Sellimonas.id.14369	Hypertrophic Scar	Weighted mode	9	-0.251157	0.186389	0.21474	0.7779	0.539842	1.12094
genus.Senegalimassilia.id.11160	Hypertrophic Scar	Weighted mode	5	-0.0999487	0.360937	0.795567	0.904884	0.446022	1.83582
genus.Slackia.id.825	Hypertrophic Scar	Weighted mode	6	-0.197096	0.409199	0.650388	0.821112	0.368201	1.83113
genus.Streptococcus.id.1853	Hypertrophic Scar	Weighted mode	15	-0.0910997	0.370853	0.809518	0.912927	0.441326	1.88848
genus.Subdoligranulum.id.2070	Hypertrophic Scar	Weighted mode	11	0.440808	0.419289	0.317852	1.55396	0.683179	3.53465
genus.Sutterella.id.2896	Hypertrophic Scar	Weighted mode	12	0.275821	0.439404	0.543001	1.31761	0.556877	3.11757
genus.Terrisporobacter.id.11348	Hypertrophic Scar	Weighted mode	5	-0.102414	0.321419	0.76595	0.902656	0.480756	1.6948
genus.Turicibacter.id.2162	Hypertrophic Scar	Weighted mode	10	0.128419	0.32118	0.698602	1.13703	0.605867	2.13386
genus.Tyzzerella3.id.11335	Hypertrophic Scar	Weighted mode	13	-0.0654566	0.244966	0.793847	0.93664	0.5795	1.51388
genus.Veillonella.id.2198	Hypertrophic Scar	Weighted mode	6	-0.377963	0.333223	0.308118	0.685256	0.356622	1.31673
genus.Victivallis.id.2256	Hypertrophic Scar	Weighted mode	10	0.223401	0.215013	0.325907	1.25032	0.82035	1.90566
order.Actinomycetales.id.420	Hypertrophic Scar	Weighted mode	4	-0.36199	0.299252	0.313041	0.696289	0.387312	1.25175
order.Bacillales.id.1674	Hypertrophic Scar	Weighted mode	8	-0.14643	0.227319	0.539997	0.863786	0.553233	1.34867
order.Bacteroidales.id.913	Hypertrophic Scar	Weighted mode	12	-0.455602	0.46693	0.350164	0.634066	0.253908	1.58341
order.Bifidobacteriales.id.432	Hypertrophic Scar	Weighted mode	11	-0.302054	0.265099	0.281094	0.739298	0.439706	1.24302
order.Burkholderiales.id.2874	Hypertrophic Scar	Weighted mode	10	-0.364165	0.416765	0.404944	0.694776	0.306964	1.57254
order.Clostridiales.id.1863	Hypertrophic Scar	Weighted mode	13	-0.200409	0.418692	0.640786	0.818396	0.360218	1.85935
order.Coriobacteriales.id.810	Hypertrophic Scar	Weighted mode	14	-0.532994	0.446701	0.254121	0.586845	0.244503	1.40852
order.Desulfovibrionales.id.3156	Hypertrophic Scar	Weighted mode	12	0.148424	0.334584	0.665924	1.16	0.602083	2.23493
order.Enterobacteriales.id.3468	Hypertrophic Scar	Weighted mode	7	-0.220278	0.407313	0.608116	0.802295	0.361096	1.78257
order.Erysipelotrichales.id.2148	Hypertrophic Scar	Weighted mode	13	0.464255	0.475437	0.348102	1.59083	0.626503	4.03946
order.Gastranaerophilales.id.1591	Hypertrophic Scar	Weighted mode	9	-0.0219353	0.32316	0.947549	0.978304	0.519272	1.84312
order.Lactobacillales.id.1800	Hypertrophic Scar	Weighted mode	15	-0.393142	0.329338	0.252418	0.674933	0.353934	1.28706
order.Methanobacteriales.id.120	Hypertrophic Scar	Weighted mode	10	-0.0468212	0.205567	0.824918	0.954258	0.637799	1.42774
order.MollicutesRF9.id.11579	Hypertrophic Scar	Weighted mode	13	0.365339	0.290184	0.231974	1.441	0.815934	2.54492
order.NB1n.id.3953	Hypertrophic Scar	Weighted mode	12	-0.0967307	0.273186	0.72997	0.9078	0.531434	1.55071
order.Pasteurellales.id.3688	Hypertrophic Scar	Weighted mode	14	0.201456	0.197418	0.326129	1.22318	0.830703	1.8011
order.Rhodospirillales.id.2667	Hypertrophic Scar	Weighted mode	14	-0.116398	0.286274	0.690919	0.890121	0.507887	1.56002
order.Selenomonadales.id.2165	Hypertrophic Scar	Weighted mode	12	0.0264609	0.453462	0.954514	1.02681	0.422179	2.49739
order.Verrucomicrobiales.id.4030	Hypertrophic Scar	Weighted mode	11	0.270681	0.325232	0.424685	1.31086	0.692967	2.47969
order.Victivallales.id.2254	Hypertrophic Scar	Weighted mode	8	-0.23467	0.25822	0.393669	0.790832	0.476741	1.31185
phylum.Actinobacteria.id.400	Hypertrophic Scar	Weighted mode	15	-0.135257	0.4285	0.756924	0.873492	0.377148	2.02304
phylum.Bacteroidetes.id.905	Hypertrophic Scar	Weighted mode	10	-0.429323	0.503273	0.41575	0.65095	0.242747	1.74559
phylum.Cyanobacteria.id.1500	Hypertrophic Scar	Weighted mode	8	-0.188125	0.292086	0.540049	0.828511	0.467379	1.46868
phylum.Euryarchaeota.id.55	Hypertrophic Scar	Weighted mode	12	-0.0589389	0.188871	0.760831	0.942764	0.651078	1.36513
phylum.Firmicutes.id.1672	Hypertrophic Scar	Weighted mode	15	-0.346195	0.284789	0.244231	0.707374	0.404792	1.23614
phylum.Lentisphaerae.id.2238	Hypertrophic Scar	Weighted mode	9	-0.168439	0.249045	0.517898	0.844983	0.518629	1.3767
phylum.Proteobacteria.id.2375	Hypertrophic Scar	Weighted mode	12	0.349079	0.370821	0.366731	1.41776	0.685416	2.9326
phylum.Tenericutes.id.3919	Hypertrophic Scar	Weighted mode	12	0.362981	0.328869	0.293272	1.43761	0.754574	2.73892
phylum.Verrucomicrobia.id.3982	Hypertrophic Scar	Weighted mode	12	0.236399	0.275288	0.40881	1.26668	0.738477	2.17268

## Sheet: Weighted Median
id.exposure	outcome	method	nsnp	b	se	p	OR	OR_lci95	OR_uci95
class.Actinobacteria.id.419	Hypertrophic Scar	Weighted median	15	0.132543	0.222172	0.550789	1.14173	0.738663	1.76473
class.Alphaproteobacteria.id.2379	Hypertrophic Scar	Weighted median	7	0.380124	0.231623	0.10077	1.46247	0.928805	2.30275
class.Bacilli.id.1673	Hypertrophic Scar	Weighted median	18	-0.175072	0.216987	0.419762	0.839396	0.54861	1.28431
class.Bacteroidia.id.912	Hypertrophic Scar	Weighted median	12	-0.157589	0.272661	0.563286	0.854201	0.500572	1.45765
class.Betaproteobacteria.id.2867	Hypertrophic Scar	Weighted median	10	-0.20435	0.280237	0.465878	0.815177	0.470663	1.41187
class.Clostridia.id.1859	Hypertrophic Scar	Weighted median	12	-0.135887	0.284553	0.632973	0.872941	0.499767	1.52476
class.Coriobacteriia.id.809	Hypertrophic Scar	Weighted median	14	-0.349741	0.262599	0.182912	0.704871	0.421289	1.17934
class.Deltaproteobacteria.id.3087	Hypertrophic Scar	Weighted median	13	0.170983	0.261461	0.513144	1.18647	0.710717	1.98069
class.Erysipelotrichia.id.2147	Hypertrophic Scar	Weighted median	13	0.451759	0.284789	0.112673	1.57107	0.89904	2.74545
class.Gammaproteobacteria.id.3303	Hypertrophic Scar	Weighted median	7	-0.21849	0.313122	0.485316	0.803731	0.435087	1.48473
class.Lentisphaeria.id.2250	Hypertrophic Scar	Weighted median	8	-0.1949	0.173097	0.260184	0.822917	0.586155	1.15531
class.Melainabacteria.id.1589	Hypertrophic Scar	Weighted median	10	0.273813	0.188241	0.145783	1.31497	0.909247	1.90173
class.Methanobacteria.id.119	Hypertrophic Scar	Weighted median	10	-0.0313896	0.137434	0.819337	0.969098	0.740255	1.26869
class.Mollicutes.id.3920	Hypertrophic Scar	Weighted median	12	0.298252	0.220869	0.176901	1.3475	0.874021	2.07748
class.Negativicutes.id.2164	Hypertrophic Scar	Weighted median	12	0.0863685	0.279607	0.757404	1.09021	0.630235	1.88589
class.Verrucomicrobiae.id.4029	Hypertrophic Scar	Weighted median	11	0.14142	0.22633	0.532076	1.15191	0.7392	1.79504
family.Acidaminococcaceae.id.2166	Hypertrophic Scar	Weighted median	7	0.0928904	0.251822	0.712222	1.09734	0.669864	1.79762
family.Actinomycetaceae.id.421	Hypertrophic Scar	Weighted median	4	-0.313445	0.253743	0.216725	0.730925	0.44451	1.20189
family.Alcaligenaceae.id.2875	Hypertrophic Scar	Weighted median	11	0.149107	0.297996	0.616819	1.1608	0.647287	2.08169
family.Bacteroidaceae.id.917	Hypertrophic Scar	Weighted median	9	-0.286248	0.293116	0.328782	0.751076	0.422843	1.3341
family.BacteroidalesS24.7group.id.11173	Hypertrophic Scar	Weighted median	8	-0.0325248	0.221907	0.883472	0.967998	0.626591	1.49543
family.Bifidobacteriaceae.id.433	Hypertrophic Scar	Weighted median	11	-0.308674	0.228049	0.175883	0.73442	0.469705	1.14832
family.Christensenellaceae.id.1866	Hypertrophic Scar	Weighted median	11	-0.0833435	0.220581	0.705552	0.920035	0.597094	1.41764
family.Clostridiaceae1.id.1869	Hypertrophic Scar	Weighted median	10	-0.295386	0.243167	0.224463	0.744244	0.462091	1.19868
family.ClostridialesvadinBB60group.id.11286	Hypertrophic Scar	Weighted median	15	-0.225184	0.182233	0.216573	0.798369	0.558578	1.1411
family.Coriobacteriaceae.id.811	Hypertrophic Scar	Weighted median	14	-0.349741	0.259502	0.177742	0.704871	0.423855	1.1722
family.Defluviitaleaceae.id.1924	Hypertrophic Scar	Weighted median	11	-0.0214827	0.213071	0.91969	0.978746	0.644615	1.48607
family.Desulfovibrionaceae.id.3169	Hypertrophic Scar	Weighted median	10	0.173622	0.254346	0.494846	1.18961	0.722603	1.95842
family.Enterobacteriaceae.id.3469	Hypertrophic Scar	Weighted median	7	-0.204821	0.321731	0.524372	0.814793	0.433695	1.53077
family.Erysipelotrichaceae.id.2149	Hypertrophic Scar	Weighted median	13	0.451759	0.286044	0.114259	1.57107	0.896832	2.75221
family.FamilyXI.id.1936	Hypertrophic Scar	Weighted median	8	-0.161444	0.147147	0.272572	0.850914	0.637722	1.13538
family.FamilyXIII.id.1957	Hypertrophic Scar	Weighted median	10	-0.15967	0.279002	0.567126	0.852425	0.493361	1.47281
family.Lachnospiraceae.id.1987	Hypertrophic Scar	Weighted median	16	-0.161979	0.257632	0.529531	0.850459	0.513278	1.40914
family.Lactobacillaceae.id.1836	Hypertrophic Scar	Weighted median	8	-0.0538746	0.185938	0.772012	0.947551	0.658156	1.3642
family.Methanobacteriaceae.id.121	Hypertrophic Scar	Weighted median	10	-0.0313896	0.137927	0.819971	0.969098	0.739541	1.26991
family.Oxalobacteraceae.id.2966	Hypertrophic Scar	Weighted median	14	0.146067	0.139068	0.293567	1.15727	0.881168	1.5199
family.Pasteurellaceae.id.3689	Hypertrophic Scar	Weighted median	14	0.190635	0.168752	0.258613	1.21002	0.869255	1.68437
family.Peptococcaceae.id.2024	Hypertrophic Scar	Weighted median	9	0.027322	0.218744	0.9006	1.0277	0.669371	1.57785
family.Peptostreptococcaceae.id.2042	Hypertrophic Scar	Weighted median	13	-0.212158	0.214622	0.322897	0.808836	0.531093	1.23183
family.Porphyromonadaceae.id.943	Hypertrophic Scar	Weighted median	9	-0.0983001	0.354526	0.781571	0.906377	0.452408	1.81588
family.Prevotellaceae.id.960	Hypertrophic Scar	Weighted median	16	-0.159132	0.222645	0.474773	0.852884	0.551278	1.3195
family.Rhodospirillaceae.id.2717	Hypertrophic Scar	Weighted median	15	-0.0187928	0.185765	0.91942	0.981383	0.681886	1.41242
family.Rikenellaceae.id.967	Hypertrophic Scar	Weighted median	16	0.0914839	0.227089	0.687055	1.0958	0.702148	1.71015
family.Ruminococcaceae.id.2050	Hypertrophic Scar	Weighted median	10	-0.248615	0.242183	0.304628	0.77988	0.485152	1.25365
family.Streptococcaceae.id.1850	Hypertrophic Scar	Weighted median	14	-0.021364	0.240245	0.929141	0.978863	0.611253	1.56755
family.Veillonellaceae.id.2172	Hypertrophic Scar	Weighted median	19	-0.0778472	0.206246	0.70584	0.925106	0.617492	1.38596
family.Verrucomicrobiaceae.id.4036	Hypertrophic Scar	Weighted median	11	0.141452	0.23238	0.542717	1.15195	0.73051	1.81651
family.Victivallaceae.id.2255	Hypertrophic Scar	Weighted median	12	0.121133	0.120874	0.316273	1.12878	0.890672	1.43053
genus.Clostridiuminnocuumgroup.id.14397	Hypertrophic Scar	Weighted median	8	-0.0178443	0.157404	0.90974	0.982314	0.721549	1.33732
genus.Eubacteriumbrachygroup.id.11296	Hypertrophic Scar	Weighted median	10	-0.0763882	0.150304	0.611295	0.926456	0.690055	1.24385
genus.Eubacteriumcoprostanoligenesgroup.id.11375	Hypertrophic Scar	Weighted median	13	-0.559157	0.277986	0.0442774	0.571691	0.331539	0.985798
genus.Eubacteriumeligensgroup.id.14372	Hypertrophic Scar	Weighted median	7	-0.118524	0.33155	0.72073	0.888231	0.463772	1.70117
genus.Eubacteriumfissicatenagroup.id.14373	Hypertrophic Scar	Weighted median	9	0.28597	0.157067	0.0686537	1.33105	0.978357	1.81089
genus.Eubacteriumhalliigroup.id.11338	Hypertrophic Scar	Weighted median	14	0.0307551	0.244548	0.899919	1.03123	0.638548	1.66541
genus.Eubacteriumnodatumgroup.id.11297	Hypertrophic Scar	Weighted median	11	0.120053	0.119737	0.316033	1.12756	0.891695	1.42581
genus.Eubacteriumoxidoreducensgroup.id.11339	Hypertrophic Scar	Weighted median	5	-0.0161021	0.208041	0.938307	0.984027	0.654513	1.47943
genus.Eubacteriumrectalegroup.id.14374	Hypertrophic Scar	Weighted median	8	-0.0934795	0.322717	0.772073	0.910757	0.483838	1.71437
genus.Eubacteriumruminantiumgroup.id.11340	Hypertrophic Scar	Weighted median	18	-0.0450474	0.148252	0.761238	0.955952	0.714893	1.2783
genus.Eubacteriumventriosumgroup.id.11341	Hypertrophic Scar	Weighted median	15	0.138969	0.222715	0.532642	1.14909	0.742634	1.778
genus.Eubacteriumxylanophilumgroup.id.14375	Hypertrophic Scar	Weighted median	9	-0.118697	0.23052	0.606617	0.888077	0.565233	1.39532
genus.Ruminococcusgauvreauiigroup.id.11342	Hypertrophic Scar	Weighted median	12	-0.070994	0.223082	0.750301	0.931467	0.601557	1.44231
genus.Ruminococcusgnavusgroup.id.14376	Hypertrophic Scar	Weighted median	11	0.174512	0.171887	0.309976	1.19066	0.850113	1.66764
genus.Ruminococcustorquesgroup.id.14377	Hypertrophic Scar	Weighted median	9	0.0793111	0.33955	0.815313	1.08254	0.556434	2.10608
genus.Actinomyces.id.423	Hypertrophic Scar	Weighted median	7	0.0315931	0.211523	0.881269	1.0321	0.681818	1.56233
genus.Adlercreutzia.id.812	Hypertrophic Scar	Weighted median	8	0.386281	0.219186	0.078012	1.4715	0.957601	2.26118
genus.Akkermansia.id.4037	Hypertrophic Scar	Weighted median	11	0.141142	0.23197	0.54289	1.15159	0.730871	1.81449
genus.Alistipes.id.968	Hypertrophic Scar	Weighted median	13	0.215987	0.275957	0.433811	1.24109	0.722609	2.13158
genus.Allisonella.id.2174	Hypertrophic Scar	Weighted median	8	-0.155757	0.147598	0.291298	0.855768	0.640794	1.14286
genus.Alloprevotella.id.961	Hypertrophic Scar	Weighted median	5	-0.089218	0.170737	0.601291	0.914646	0.654513	1.27817
genus.Anaerofilum.id.2053	Hypertrophic Scar	Weighted median	10	0.23854	0.165983	0.15068	1.26939	0.916872	1.75746
genus.Anaerostipes.id.1991	Hypertrophic Scar	Weighted median	13	0.166176	0.280641	0.553763	1.18078	0.681213	2.04671
genus.Anaerotruncus.id.2054	Hypertrophic Scar	Weighted median	13	-0.150338	0.257769	0.559741	0.860417	0.519148	1.42602
genus.Bacteroides.id.918	Hypertrophic Scar	Weighted median	9	-0.286248	0.3061	0.349713	0.751076	0.412218	1.36849
genus.Barnesiella.id.944	Hypertrophic Scar	Weighted median	13	0.157482	0.239522	0.510869	1.17056	0.731995	1.87188
genus.Bifidobacterium.id.436	Hypertrophic Scar	Weighted median	12	0.0888831	0.222236	0.689195	1.09295	0.707017	1.68956
genus.Bilophila.id.3170	Hypertrophic Scar	Weighted median	13	-0.239616	0.227186	0.291557	0.78693	0.504141	1.22835
genus.Blautia.id.1992	Hypertrophic Scar	Weighted median	13	0.145319	0.277217	0.600136	1.15641	0.671644	1.99105
genus.Butyricicoccus.id.2055	Hypertrophic Scar	Weighted median	8	0.438532	0.28863	0.128672	1.55043	0.880573	2.72985
genus.Butyricimonas.id.945	Hypertrophic Scar	Weighted median	13	0.0472719	0.226757	0.834862	1.04841	0.672219	1.63512
genus.Butyrivibrio.id.1993	Hypertrophic Scar	Weighted median	15	0.0124993	0.115766	0.914019	1.01258	0.807024	1.27049
genus.CandidatusSoleaferrea.id.11350	Hypertrophic Scar	Weighted median	9	0.201726	0.200098	0.313388	1.22351	0.826574	1.81107
genus.Catenibacterium.id.2153	Hypertrophic Scar	Weighted median	4	-0.068094	0.18778	0.716884	0.934173	0.646525	1.3498
genus.ChristensenellaceaeR.7group.id.11283	Hypertrophic Scar	Weighted median	9	-0.222469	0.35288	0.528407	0.80054	0.400872	1.59868
genus.Clostridiumsensustricto1.id.1873	Hypertrophic Scar	Weighted median	7	-0.0707863	0.267248	0.791109	0.931661	0.551787	1.57306
genus.Collinsella.id.815	Hypertrophic Scar	Weighted median	9	0.116245	0.304242	0.702402	1.12327	0.61874	2.0392
genus.Coprobacter.id.949	Hypertrophic Scar	Weighted median	11	0.0900776	0.182883	0.622335	1.09426	0.764623	1.566
genus.Coprococcus1.id.11301	Hypertrophic Scar	Weighted median	12	0.00892854	0.246946	0.971158	1.00897	0.621832	1.63713
genus.Coprococcus2.id.11302	Hypertrophic Scar	Weighted median	8	0.4562	0.285698	0.110313	1.57807	0.901434	2.76259
genus.Coprococcus3.id.11303	Hypertrophic Scar	Weighted median	9	-0.272609	0.299218	0.362259	0.761391	0.423553	1.3687
genus.DefluviitaleaceaeUCG011.id.11287	Hypertrophic Scar	Weighted median	9	-0.0183506	0.222651	0.934314	0.981817	0.634609	1.51899
genus.Desulfovibrio.id.3173	Hypertrophic Scar	Weighted median	10	0.0401565	0.224128	0.857806	1.04097	0.6709	1.61518
genus.Dialister.id.2183	Hypertrophic Scar	Weighted median	10	-0.0611117	0.23656	0.796149	0.940718	0.591691	1.49563
genus.Dorea.id.1997	Hypertrophic Scar	Weighted median	10	-0.0584249	0.295963	0.84351	0.943249	0.528078	1.68483
genus.Eggerthella.id.819	Hypertrophic Scar	Weighted median	10	-0.206303	0.173468	0.234327	0.813587	0.579089	1.14304
genus.Eisenbergiella.id.11304	Hypertrophic Scar	Weighted median	11	0.0893442	0.162762	0.583056	1.09346	0.794797	1.50434
genus.Enterorhabdus.id.820	Hypertrophic Scar	Weighted median	6	-0.059044	0.256852	0.818188	0.942665	0.569798	1.55953
genus.Erysipelatoclostridium.id.11381	Hypertrophic Scar	Weighted median	15	0.0420948	0.187636	0.822491	1.04299	0.722042	1.50661
genus.ErysipelotrichaceaeUCG003.id.11384	Hypertrophic Scar	Weighted median	16	-0.210856	0.224783	0.348223	0.809891	0.5213	1.25825
genus.Escherichia.Shigella.id.3504	Hypertrophic Scar	Weighted median	10	-0.0214121	0.25863	0.934018	0.978816	0.589591	1.62499
genus.Faecalibacterium.id.2057	Hypertrophic Scar	Weighted median	10	-0.218512	0.219013	0.318418	0.803714	0.523208	1.23461
genus.FamilyXIIIAD3011group.id.11293	Hypertrophic Scar	Weighted median	13	0.230808	0.236647	0.329398	1.25962	0.792138	2.00298
genus.FamilyXIIIUCG001.id.11294	Hypertrophic Scar	Weighted median	8	0.180141	0.26417	0.495294	1.19739	0.713457	2.00956
genus.Flavonifractor.id.2059	Hypertrophic Scar	Weighted median	5	-0.233463	0.292245	0.42437	0.791787	0.446524	1.40401
genus.Fusicatenibacter.id.11305	Hypertrophic Scar	Weighted median	18	0.198294	0.23834	0.405422	1.21932	0.764255	1.94535
genus.Gordonibacter.id.821	Hypertrophic Scar	Weighted median	11	0.0561574	0.137288	0.682503	1.05776	0.808216	1.38436
genus.Haemophilus.id.3698	Hypertrophic Scar	Weighted median	9	0.16784	0.194548	0.388294	1.18275	0.807773	1.73179
genus.Holdemanella.id.11393	Hypertrophic Scar	Weighted median	11	-0.0135287	0.170606	0.936795	0.986562	0.706158	1.37831
genus.Holdemania.id.2157	Hypertrophic Scar	Weighted median	15	-0.025481	0.196184	0.896659	0.974841	0.663649	1.43195
genus.Howardella.id.2000	Hypertrophic Scar	Weighted median	10	-0.214741	0.134334	0.109918	0.80675	0.62	1.04975
genus.Hungatella.id.11306	Hypertrophic Scar	Weighted median	5	0.0187647	0.186698	0.919941	1.01894	0.70669	1.46916
genus.Intestinibacter.id.11345	Hypertrophic Scar	Weighted median	14	0.0920997	0.226344	0.68408	1.09647	0.703608	1.7087
genus.Intestinimonas.id.2062	Hypertrophic Scar	Weighted median	16	-0.0426532	0.182516	0.815221	0.958244	0.670062	1.37037
genus.Lachnoclostridium.id.11308	Hypertrophic Scar	Weighted median	13	0.00702545	0.268816	0.97915	1.00705	0.594607	1.70558
genus.Lachnospira.id.2004	Hypertrophic Scar	Weighted median	6	0.0921066	0.362201	0.799266	1.09648	0.539126	2.23004
genus.LachnospiraceaeFCS020group.id.11314	Hypertrophic Scar	Weighted median	12	-0.0427612	0.233793	0.854875	0.95814	0.605928	1.51509
genus.LachnospiraceaeNC2004group.id.11316	Hypertrophic Scar	Weighted median	9	0.276964	0.185873	0.136207	1.31912	0.916358	1.8989
genus.LachnospiraceaeND3007group.id.11317	Hypertrophic Scar	Weighted median	3	0.0410782	0.486929	0.932769	1.04193	0.401197	2.70597
genus.LachnospiraceaeNK4A136group.id.11319	Hypertrophic Scar	Weighted median	15	-0.255783	0.216235	0.23685	0.77431	0.506818	1.18298
genus.LachnospiraceaeUCG001.id.11321	Hypertrophic Scar	Weighted median	13	-0.0667639	0.183412	0.715851	0.935416	0.652952	1.34007
genus.LachnospiraceaeUCG004.id.11324	Hypertrophic Scar	Weighted median	12	-0.194003	0.255278	0.447275	0.823655	0.499399	1.35845
genus.LachnospiraceaeUCG008.id.11328	Hypertrophic Scar	Weighted median	10	0.116571	0.181267	0.520164	1.12364	0.787642	1.60296
genus.LachnospiraceaeUCG010.id.11330	Hypertrophic Scar	Weighted median	10	-0.106651	0.263881	0.686092	0.898839	0.535872	1.50766
genus.Lactobacillus.id.1837	Hypertrophic Scar	Weighted median	8	-0.0959597	0.182843	0.599709	0.908501	0.634872	1.30006
genus.Lactococcus.id.1851	Hypertrophic Scar	Weighted median	9	0.0188244	0.172486	0.913095	1.019	0.726696	1.42889
genus.Marvinbryantia.id.2005	Hypertrophic Scar	Weighted median	10	0.290132	0.256467	0.257943	1.3366	0.808526	2.20959
genus.Methanobrevibacter.id.123	Hypertrophic Scar	Weighted median	6	0.0479933	0.190065	0.800647	1.04916	0.722864	1.52276
genus.Odoribacter.id.952	Hypertrophic Scar	Weighted median	7	0.0250411	0.299407	0.933346	1.02536	0.570184	1.84389
genus.Olsenella.id.822	Hypertrophic Scar	Weighted median	11	0.0723531	0.128898	0.574578	1.07503	0.835031	1.38402
genus.Oscillibacter.id.2063	Hypertrophic Scar	Weighted median	13	0.0556956	0.180419	0.757549	1.05728	0.742356	1.50579
genus.Oscillospira.id.2064	Hypertrophic Scar	Weighted median	8	0.136169	0.217643	0.531542	1.14588	0.747956	1.75549
genus.Oxalobacter.id.2978	Hypertrophic Scar	Weighted median	11	-0.00805753	0.141303	0.954527	0.991975	0.752006	1.30852
genus.Parabacteroides.id.954	Hypertrophic Scar	Weighted median	5	0.647216	0.387109	0.0945397	1.91022	0.894476	4.0794
genus.Paraprevotella.id.962	Hypertrophic Scar	Weighted median	13	0.119247	0.159166	0.453737	1.12665	0.824715	1.53912
genus.Parasutterella.id.2892	Hypertrophic Scar	Weighted median	14	0.0107819	0.189883	0.954719	1.01084	0.696709	1.46661
genus.Peptococcus.id.2037	Hypertrophic Scar	Weighted median	12	-0.0176151	0.150901	0.907072	0.982539	0.730972	1.32068
genus.Phascolarctobacterium.id.2168	Hypertrophic Scar	Weighted median	9	0.0576261	0.231946	0.803789	1.05932	0.672342	1.66903
genus.Prevotella7.id.11182	Hypertrophic Scar	Weighted median	11	-0.0112321	0.131945	0.93216	0.988831	0.763498	1.28067
genus.Prevotella9.id.11183	Hypertrophic Scar	Weighted median	15	0.0632817	0.187976	0.736382	1.06533	0.737012	1.5399
genus.RikenellaceaeRC9gutgroup.id.11191	Hypertrophic Scar	Weighted median	11	0.0241889	0.135359	0.858172	1.02448	0.785751	1.33575
genus.Romboutsia.id.11347	Hypertrophic Scar	Weighted median	13	0.291595	0.242672	0.229517	1.33856	0.831901	2.1538
genus.Roseburia.id.2012	Hypertrophic Scar	Weighted median	14	-0.273144	0.250952	0.276404	0.760983	0.465329	1.24449
genus.Ruminiclostridium5.id.11355	Hypertrophic Scar	Weighted median	10	-0.123833	0.292383	0.671909	0.883527	0.498125	1.56712
genus.Ruminiclostridium6.id.11356	Hypertrophic Scar	Weighted median	16	0.176528	0.22513	0.432971	1.19307	0.767416	1.85481
genus.Ruminiclostridium9.id.11357	Hypertrophic Scar	Weighted median	9	0.383354	0.333559	0.25044	1.4672	0.763057	2.82111
genus.RuminococcaceaeNK4A214group.id.11358	Hypertrophic Scar	Weighted median	13	-0.207401	0.245985	0.399145	0.812693	0.501811	1.31617
genus.RuminococcaceaeUCG002.id.11360	Hypertrophic Scar	Weighted median	21	-0.118575	0.182438	0.515728	0.888185	0.621168	1.26998
genus.RuminococcaceaeUCG003.id.11361	Hypertrophic Scar	Weighted median	12	0.130062	0.23296	0.576637	1.1389	0.721416	1.79798
genus.RuminococcaceaeUCG004.id.11362	Hypertrophic Scar	Weighted median	11	0.132659	0.21606	0.53922	1.14186	0.747652	1.74392
genus.RuminococcaceaeUCG005.id.11363	Hypertrophic Scar	Weighted median	14	-0.0454631	0.226404	0.840851	0.955555	0.613108	1.48927
genus.RuminococcaceaeUCG009.id.11366	Hypertrophic Scar	Weighted median	11	-0.198305	0.177038	0.262661	0.82012	0.579668	1.16031
genus.RuminococcaceaeUCG010.id.11367	Hypertrophic Scar	Weighted median	6	-0.0187465	0.29808	0.949853	0.981428	0.547177	1.76031
genus.RuminococcaceaeUCG011.id.11368	Hypertrophic Scar	Weighted median	8	0.241765	0.165401	0.143827	1.27349	0.920884	1.76112
genus.RuminococcaceaeUCG013.id.11370	Hypertrophic Scar	Weighted median	11	0.0727162	0.253191	0.77396	1.07543	0.654727	1.76645
genus.RuminococcaceaeUCG014.id.11371	Hypertrophic Scar	Weighted median	11	-0.153769	0.240917	0.523302	0.857471	0.534745	1.37497
genus.Ruminococcus1.id.11373	Hypertrophic Scar	Weighted median	10	-0.112795	0.285759	0.69305	0.893334	0.510235	1.56407
genus.Ruminococcus2.id.11374	Hypertrophic Scar	Weighted median	15	0.0617849	0.207404	0.765782	1.06373	0.708414	1.59727
genus.Sellimonas.id.14369	Hypertrophic Scar	Weighted median	9	-0.205711	0.134625	0.126504	0.814068	0.625268	1.05988
genus.Senegalimassilia.id.11160	Hypertrophic Scar	Weighted median	5	-0.0953616	0.261773	0.715641	0.909044	0.5442	1.51849
genus.Slackia.id.825	Hypertrophic Scar	Weighted median	6	0.0732293	0.237835	0.758158	1.07598	0.675078	1.71495
genus.Streptococcus.id.1853	Hypertrophic Scar	Weighted median	15	-0.0478827	0.236132	0.839308	0.953246	0.600075	1.51427
genus.Subdoligranulum.id.2070	Hypertrophic Scar	Weighted median	11	0.458275	0.2645	0.0831649	1.58134	0.941629	2.65566
genus.Sutterella.id.2896	Hypertrophic Scar	Weighted median	12	0.109437	0.238197	0.64592	1.11565	0.699472	1.77945
genus.Terrisporobacter.id.11348	Hypertrophic Scar	Weighted median	5	-0.0554303	0.257086	0.829292	0.946078	0.571598	1.5659
genus.Turicibacter.id.2162	Hypertrophic Scar	Weighted median	10	0.00468468	0.205759	0.981835	1.0047	0.671258	1.50376
genus.Tyzzerella3.id.11335	Hypertrophic Scar	Weighted median	13	0.062225	0.155211	0.68849	1.0642	0.785065	1.44259
genus.Veillonella.id.2198	Hypertrophic Scar	Weighted median	6	-0.375372	0.274101	0.170854	0.687034	0.401475	1.1757
genus.Victivallis.id.2256	Hypertrophic Scar	Weighted median	10	0.208613	0.134111	0.119822	1.23197	0.9472	1.60235
order.Actinomycetales.id.420	Hypertrophic Scar	Weighted median	4	-0.313539	0.254137	0.217299	0.730856	0.444126	1.2027
order.Bacillales.id.1674	Hypertrophic Scar	Weighted median	8	-0.103711	0.135868	0.44527	0.901485	0.690726	1.17655
order.Bacteroidales.id.913	Hypertrophic Scar	Weighted median	12	-0.157589	0.274027	0.565233	0.854201	0.499233	1.46156
order.Bifidobacteriales.id.432	Hypertrophic Scar	Weighted median	11	-0.308674	0.219078	0.158843	0.73442	0.478037	1.12831
order.Burkholderiales.id.2874	Hypertrophic Scar	Weighted median	10	-0.2446	0.280432	0.383084	0.783017	0.451922	1.35669
order.Clostridiales.id.1863	Hypertrophic Scar	Weighted median	13	-0.107222	0.265857	0.686723	0.898326	0.533497	1.51264
order.Coriobacteriales.id.810	Hypertrophic Scar	Weighted median	14	-0.349741	0.255071	0.170327	0.704871	0.427552	1.16206
order.Desulfovibrionales.id.3156	Hypertrophic Scar	Weighted median	12	0.167448	0.265094	0.527614	1.18228	0.703184	1.98781
order.Enterobacteriales.id.3468	Hypertrophic Scar	Weighted median	7	-0.204821	0.323081	0.526107	0.814793	0.432549	1.53483
order.Erysipelotrichales.id.2148	Hypertrophic Scar	Weighted median	13	0.451759	0.287106	0.115604	1.57107	0.894967	2.75795
order.Gastranaerophilales.id.1591	Hypertrophic Scar	Weighted median	9	-0.145992	0.195819	0.455943	0.864165	0.588724	1.26847
order.Lactobacillales.id.1800	Hypertrophic Scar	Weighted median	15	-0.352393	0.230777	0.126766	0.703004	0.447215	1.10509
order.Methanobacteriales.id.120	Hypertrophic Scar	Weighted median	10	-0.0313896	0.140589	0.823323	0.969098	0.735692	1.27655
order.MollicutesRF9.id.11579	Hypertrophic Scar	Weighted median	13	0.305634	0.215164	0.155471	1.35749	0.890397	2.0696
order.NB1n.id.3953	Hypertrophic Scar	Weighted median	12	0.0373193	0.156877	0.811967	1.03802	0.763258	1.4117
order.Pasteurellales.id.3688	Hypertrophic Scar	Weighted median	14	0.190635	0.171408	0.266065	1.21002	0.864741	1.69316
order.Rhodospirillales.id.2667	Hypertrophic Scar	Weighted median	14	-0.0408473	0.170323	0.810468	0.959976	0.687509	1.34042
order.Selenomonadales.id.2165	Hypertrophic Scar	Weighted median	12	0.0863685	0.28514	0.761967	1.09021	0.623439	1.90645
order.Verrucomicrobiales.id.4030	Hypertrophic Scar	Weighted median	11	0.14142	0.235981	0.548982	1.15191	0.725349	1.82932
order.Victivallales.id.2254	Hypertrophic Scar	Weighted median	8	-0.1949	0.173895	0.262377	0.822917	0.58524	1.15712
phylum.Actinobacteria.id.400	Hypertrophic Scar	Weighted median	15	0.126701	0.25252	0.615847	1.13508	0.691952	1.86198
phylum.Bacteroidetes.id.905	Hypertrophic Scar	Weighted median	10	-0.381241	0.277974	0.170219	0.683013	0.396108	1.17773
phylum.Cyanobacteria.id.1500	Hypertrophic Scar	Weighted median	8	-0.204985	0.192798	0.287685	0.814659	0.558294	1.18875
phylum.Euryarchaeota.id.55	Hypertrophic Scar	Weighted median	12	-0.0420969	0.129711	0.745526	0.958777	0.743542	1.23632
phylum.Firmicutes.id.1672	Hypertrophic Scar	Weighted median	15	-0.249333	0.230081	0.278508	0.77932	0.496441	1.22339
phylum.Lentisphaerae.id.2238	Hypertrophic Scar	Weighted median	9	-0.143301	0.165161	0.38559	0.866494	0.62687	1.19771
phylum.Proteobacteria.id.2375	Hypertrophic Scar	Weighted median	12	0.298543	0.258373	0.247896	1.34789	0.812315	2.23659
phylum.Tenericutes.id.3919	Hypertrophic Scar	Weighted median	12	0.298252	0.223455	0.181965	1.3475	0.869602	2.08803
phylum.Verrucomicrobia.id.3982	Hypertrophic Scar	Weighted median	12	0.205651	0.210926	0.329566	1.22832	0.812398	1.85719
