# Supplementary material for: Causal relationship between gut microbiota and pathological scars: a two-sample Mendelian randomization study
Source: Front Med (Lausanne). 2024 Jul 2;11:1405097. doi: 10.3389/fmed.2024.1405097 (PMC11250559; doi:10.3389/fmed.2024.1405097)
Supplement: Supplementary file 3 [file Table_3.XLSX]

## Sheet: Sheet1
Table S3. Steiger test results for MR
exposure	id.outcome	snp_r2.exposure	snp_r2.outcome	correct_causal_direction	steiger_pval
Class Melainabacteria	Keloid	0.0416704	3.66907e-05	TRUE	2.17616e-48
Class Negativicutes		0.0159268	1.83053e-05	TRUE	1.16126e-55
Order Selenomonadales		0.0138964	2.92e-05	TRUE	1.34e-44
Family Family XIII		0.0146096	1.52637e-05	TRUE	3.31841e-35
Genus Coprococcus 2		0.0159268	1.83e-05	TRUE	1.16e-55
Class Alphaproteobacteria	Hypertrophic scar	0.0165288	1.47125e-05	TRUE	6.18254e-33
Family Clostridiaceae1		0.0162602	2.29449e-05	TRUE	2.32407e-44
Family Desulfovibrionaceae		0.017913	3.60284e-05	TRUE	5.32309e-50
Genus Eubacterium coprostanoligenes group		0.0169213	3.2017e-05	TRUE	8.06057e-57
Genus Eubacterium fissicatena group		0.0512984	2.75078e-05	TRUE	2.78948e-42
Genus Erysipelotrichaceae UCG003		0.0301354	4.25944e-05	TRUE	1.95574e-75
Genus Subdoligranulum		0.0186667	3.46e-05	TRUE	1.55e-56
